# Supplementary material for: Genome Analysis of Planctomycetes Inhabiting Blades of the Red Alga Porphyra umbilicalis
Source: PLoS One. 2016 Mar 25;11(3):e0151883. doi: 10.1371/journal.pone.0151883 (PMC4807772; doi:10.1371/journal.pone.0151883)
Supplement: S1 Data — (XLSX) [file pone.0151883.s001.xlsx]

## Sheet: rrub
family accession	family size	gene accession (IMG Gene ID or NCBI GI)	desc
rrub_NCIM00001	200	rrub_460846121,rrub_460845790,rrub_460845794,rrub_460845799,rrub_460845805,rrub_460845804,rrub_460849655,rrub_460849652,rrub_460849650,rrub_460844427,rrub_460844425,rrub_460844423,rrub_460848071,rrub_460848072,rrub_460847556,rrub_460842740,rrub_460846205,rrub_460846208,rrub_460846209,rrub_460846115,rrub_460846116,rrub_460846110,rrub_460845652,rrub_460844695,rrub_460844694,rrub_460843422,rrub_4608…	N-acetylgalactosamine 6-sulfate sulfatase (GALNS)::N-acetylgalactosamine 6-sulfate sulfatase (GALNS), partial::arylsulfatase A::sulfatase family protein::arylsulfatase A::mucin-desulfating sulfatase (N-acetylglucosamine-6-sulfatase)::arylsulfatase A::N-acetylgalactosamine 6-sulfate sulfatase (GALNS)::N-acetylgalactosamine 6-sulfate sulfatase (GALNS)::mucin-desulfating sulfatase (N-acetylglucosami…
rrub_NCIM00002	118	rrub_460845801,rrub_460845578,rrub_460844996,rrub_460842743,rrub_460847888,rrub_460846684,rrub_460846060,rrub_460849222,rrub_460845582,rrub_460849008,rrub_460846852,rrub_460844188,rrub_460843747,rrub_460846101,rrub_460846457,rrub_460849671,rrub_460849672,rrub_460849673,rrub_460845596,rrub_460845592,rrub_460844402,rrub_460848183,rrub_460848057,rrub_460847626,rrub_460848238,rrub_460848980,rrub_4608…	protein containing DUF1559::protein containing DUF1559::protein containing DUF1559::protein containing DUF1559::protein containing DUF1559::protein containing DUF1559::protein containing DUF1559::protein containing DUF1559::protein containing DUF1559::protein containing DUF1559::protein containing DUF1559::protein containing DUF1559::protein containing DUF1559::protein containing DUF1559::protein…
rrub_NCIM00003	100	rrub_460845150,rrub_460848722,rrub_460849784,rrub_460849011,rrub_460849012,rrub_460849015,rrub_460845778,rrub_460845771,rrub_460844997,rrub_460843432,rrub_460844190,rrub_460845364,rrub_460848857,rrub_460844886,rrub_460849319,rrub_460849318,rrub_460849312,rrub_460848996,rrub_460848995,rrub_460844400,rrub_460849488,rrub_460849486,rrub_460846483,rrub_460849907,rrub_460845298,rrub_460845297,rrub_4608…	response regulator receiver protein::integral membrane sensor signal transduction histidine kinase::response regulator receiver protein::response regulator receiver protein::membrane protein containing ATP-binding region, ATPase-like domain protein::protein containing ATP-binding region, ATPase-like protein::Carbon storage regulator::response regulator receiver protein::membrane protein containin…
rrub_NCIM00004	79	rrub_460845975,rrub_460849836,rrub_460842748,rrub_460849822,rrub_460849005,rrub_460848999,rrub_460846102,rrub_460847452,rrub_460845002,rrub_460844674,rrub_460843369,rrub_460849077,rrub_460845122,rrub_460847993,rrub_460845105,rrub_460844522,rrub_460848889,rrub_460847616,rrub_460846709,rrub_460846800,rrub_460844467,rrub_460843814,rrub_460844261,rrub_460847281,rrub_460843155,rrub_460847157,rrub_4608…	Serine/threonine protein kinase domain protein::serine/threonine-protein kinase::Serine/threonine protein kinase domain protein::serine/threonine protein kinase::serine/threonine protein kinase::serine/threonine protein kinase::serine/threonine-protein kinase pknB::serine/threonine-protein kinase::serine/threonine protein kinase::serine/threonine-protein kinase::serine/threonine-protein kinase::s…
rrub_NCIM00005	62	rrub_460845159,rrub_460844171,rrub_460848672,rrub_460849799,rrub_460843514,rrub_460847188,rrub_460847450,rrub_460847853,rrub_460848052,rrub_460843561,rrub_460848054,rrub_460847535,rrub_460848455,rrub_460847509,rrub_460846471,rrub_460847275,rrub_460846012,rrub_460847878,rrub_460847877,rrub_460849476,rrub_460849580,rrub_460847049,rrub_460848435,rrub_460849263,rrub_460849735,rrub_460842958,rrub_4608…	ABC transporter ATP-binding protein::zinc/manganese/iron ABC transporter, ATP-binding protein::ABC transport system, ATP-binding protein::ABC transporter, ATP-binding protein::ABC transporter, ATP-binding protein::phosphate ABC transporter, ATPase subunit::taurine ABC transporter, ATP-binding protein::polysaccharide ABC transporter ATP-binding protein::macrolide-specific ABC-type efflux carrier::…
rrub_NCIM00006	43	rrub_460845795,rrub_460849370,rrub_460847557,rrub_460843637,rrub_460848085,rrub_460847629,rrub_460843177,rrub_460845432,rrub_460849615,rrub_460843602,rrub_460848609,rrub_460846399,rrub_460848895,rrub_460845384,rrub_460849911,rrub_460849913,rrub_460847490,rrub_460847499,rrub_460848385,rrub_460843222,rrub_460844418,rrub_460843820,rrub_460848285,rrub_460847014,rrub_460846525,rrub_460846745,rrub_4608…	oxidoreductase domain-containing protein::oxidoreductase domain protein::oxidoreductase domain protein::oxidoreductase domain-containing protein::oxidoreductase domain protein::oxidoreductase domain-containing protein::oxidoreductase domain-containing protein::NADH-dependent dehydrogenase::NADH-dependent dehydrogenase::oxidoreductase domain protein::NADH-dependent dehydrogenase::oxidoreductase do…
rrub_NCIM00007	38	rrub_460846058,rrub_460845803,rrub_460848078,rrub_460849224,rrub_460843743,rrub_460843955,rrub_460846211,rrub_460844748,rrub_460846872,rrub_460849471,rrub_460845116,rrub_460844641,rrub_460849607,rrub_460847816,rrub_460849452,rrub_460848150,rrub_460843135,rrub_460843228,rrub_460844877,rrub_460843720,rrub_460844848,rrub_460849161,rrub_460845468,rrub_460849398,rrub_460849379,rrub_460849377,rrub_4608…	RNA polymerase sigma-70 ECF-like, Rhodopirellula baltica::RNA polymerase sigma-70 ECF-like, Rhodopirellula baltica::RNA polymerase sigma-70 ECF-like, Rhodopirellula baltica::RNA polymerase sigma-70 ECF-like, Rhodopirellula baltica::RNA polymerase sigma-70 ECF-like, Rhodopirellula baltica::RNA polymerase sigma-70 ECF-like, Rhodopirellula baltica::RNA polymerase, sigma-24 subunit, ECF subfamily::RN…
rrub_NCIM00008	42	rrub_460845377,rrub_460842697,rrub_460845321,rrub_460846062,rrub_460849824,rrub_460849228,rrub_460849226,rrub_460847631,rrub_460845595,rrub_460846861,rrub_460847534,rrub_460843622,rrub_460847627,rrub_460846004,rrub_460842972,rrub_460849604,rrub_460847478,rrub_460843607,rrub_460843553,rrub_460843900,rrub_460847484,rrub_460845656,rrub_460843954,rrub_460846639,rrub_460849545,rrub_460845466,rrub_4608…	planctomycete cytochrome C domain protein::planctomycete cytochrome C domain protein::planctomycete cytochrome C domain protein::planctomycete cytochrome C domain protein::planctomycete cytochrome C domain protein::planctomycete cytochrome C domain protein::planctomycete cytochrome C domain protein::planctomycete cytochrome C domain protein::planctomycete cytochrome C domain protein::planctomycet…
rrub_NCIM00009	37	rrub_460845378,rrub_460842698,rrub_460845320,rrub_460846862,rrub_460846063,rrub_460849229,rrub_460849227,rrub_460847632,rrub_460845594,rrub_460847785,rrub_460847533,rrub_460843623,rrub_460847628,rrub_460842973,rrub_460849605,rrub_460847477,rrub_460843606,rrub_460843551,rrub_460847483,rrub_460845655,rrub_460843953,rrub_460849544,rrub_460845465,rrub_460844593,rrub_460843859,rrub_460849394,rrub_4608…	protein containing DUF1501::protein containing DUF1501::protein containing DUF1501::protein containing DUF1501::protein containing DUF1501::secreted protein containing DUF1501::secreted protein containing DUF1501::protein containing DUF1501::protein containing DUF1501::protein containing DUF1501::secreted protein containing DUF1501::protein containing DUF1501::protein containing DUF1501::secreted…
rrub_NCIM00010	35	rrub_460845379,rrub_460842927,rrub_460842926,rrub_460847155,rrub_460846331,rrub_460844701,rrub_460844759,rrub_460845299,rrub_460847615,rrub_460846818,rrub_460849296,rrub_460843603,rrub_460846811,rrub_460843158,rrub_460845702,rrub_460846720,rrub_460847803,rrub_460846751,rrub_460849159,rrub_460846747,rrub_460848161,rrub_460842671,rrub_460846374,rrub_460843118,rrub_460844584,rrub_460845991,rrub_4608…	hypothetical protein RRSWK_04456::peptidase domain protein::peptidase domain protein::hypothetical protein RRSWK_02764::hypothetical protein RRSWK_03494::repeat domain protein::Phage Tail Collar domain protein, partial::lipoprotein::outer membrane adhesin like proteiin::protein containing DUF11::phosphoesterase PA-phosphatase related protein::outer membrane adhesin like proteiin::hypothetical pro…
rrub_NCIM00011	31	rrub_460846057,rrub_460845802,rrub_460848079,rrub_460845322,rrub_460849225,rrub_460846854,rrub_460843742,rrub_460846210,rrub_460844749,rrub_460846871,rrub_460849472,rrub_460845117,rrub_460849608,rrub_460847815,rrub_460849451,rrub_460843719,rrub_460843136,rrub_460844876,rrub_460844605,rrub_460849380,rrub_460849160,rrub_460849397,rrub_460849378,rrub_460849981,rrub_460843313,rrub_460849573,rrub_4608…	FecR protein domain protein::FecR protein domain protein::FecR protein domain protein::FecR protein domain protein::FecR protein domain protein::FecR protein domain protein::FecR protein domain protein::FecR protein domain protein::hypothetical protein RRSWK_05181::FecR protein domain protein::FecR protein::FecR protein domain protein::FecR protein domain protein::FecR protein domain protein::Fec…
rrub_NCIM00012	31	rrub_460845659,rrub_460848539,rrub_460848997,rrub_460843296,rrub_460843282,rrub_460849669,rrub_460842715,rrub_460843383,rrub_460845103,rrub_460843778,rrub_460843773,rrub_460843157,rrub_460846732,rrub_460848973,rrub_460846725,rrub_460844860,rrub_460848707,rrub_460843923,rrub_460845855,rrub_460843848,rrub_460848336,rrub_460846768,rrub_460846761,rrub_460848810,rrub_460847226,rrub_460848790,rrub_4608…	Pyrrolo-quinoline quinone::serine/threonine protein kinase related protein::serine/threonine protein kinase related protein::Pyrrolo-quinoline quinone::serine/threonine protein kinase::serine/threonine protein kinase related protein::polyvinylalcohol dehydrogenase::Pyrrolo-quinoline quinone::serine/threonine protein kinase::Pyrrolo-quinoline quinone::polyvinylalcohol dehydrogenase::Pyrrolo-quinol…
rrub_NCIM00013	29	rrub_460849527,rrub_460843291,rrub_460847851,rrub_460847052,rrub_460844066,rrub_460844065,rrub_460844062,rrub_460844060,rrub_460847046,rrub_460843376,rrub_460845295,rrub_460844915,rrub_460844911,rrub_460843831,rrub_460844909,rrub_460844908,rrub_460842991,rrub_460848745,rrub_460845180,rrub_460844922,rrub_460847034,rrub_460847692,rrub_460845369,rrub_460844008,rrub_460844917,rrub_460845352,rrub_4608…	glycosyl transferase, group 1 family protein::glycosyl transferase group 1 family protein::glycosyl transferase group 1::glycosyl transferase, group 1 family protein::glycosyl transferase, group 1 family protein::glycosyl transferase group 1::glycosyl transferase, group 1 family protein::Glycosyl transferase, group 1::glycosyltransferase::glycosyl transferase group 1::hexosyltransferase::glycosyl…
rrub_NCIM00014	29	rrub_460845376,rrub_460842696,rrub_460849256,rrub_460848240,rrub_460848954,rrub_460849619,rrub_460845935,rrub_460848941,rrub_460845382,rrub_460849285,rrub_460844864,rrub_460844288,rrub_460848156,rrub_460842725,rrub_460846759,rrub_460845890,rrub_460848772,rrub_460845646,rrub_460849362,rrub_460844612,rrub_460846507,rrub_460846164,rrub_460845242,rrub_460845444,rrub_460843876,rrub_460845533,rrub_4608…	transcription regulator::transcriptional regulator, AraC family protein::transcriptional regulator, AraC family::xylose operon regulatory protein::AraC family transcriptional regulator::xylose operon regulatory protein::xylose operon regulatory protein::transcriptional regulator, AraC family::xylose operon regulatory protein::transcriptional regulator, AraC family protein::Helix-turn-helix, AraC …
rrub_NCIM00015	29	rrub_460846127,rrub_460849303,rrub_460846936,rrub_460846203,rrub_460846587,rrub_460846914,rrub_460842713,rrub_460847604,rrub_460849268,rrub_460847703,rrub_460847928,rrub_460843529,rrub_460846289,rrub_460849546,rrub_460849152,rrub_460846295,rrub_460843920,rrub_460848835,rrub_460846176,rrub_460849428,rrub_460843448,rrub_460847583,rrub_460846947,rrub_460843944,rrub_460847977,rrub_460843781,rrub_4608…	short-chain dehydrogenase/reductase SDR::short-chain dehydrogenase/reductase SDR::Enoyl-(acyl-carrier-protein) reductase::short-chain dehydrogenase/reductase SDR::short-chain dehydrogenase/reductase SDR::oxidoreductase, short chain dehydrogenase/reductase family::short-chain dehydrogenase/reductase SDR::short chain dehydrogenase/reductase family oxidoreductase::2-deoxy-D-gluconate 3-dehydrogenase…
rrub_NCIM00016	27	rrub_460845756,rrub_460844519,rrub_460846114,rrub_460846113,rrub_460845748,rrub_460845745,rrub_460845747,rrub_460843636,rrub_460846321,rrub_460849670,rrub_460845755,rrub_460845750,rrub_460844404,rrub_460845723,rrub_460846499,rrub_460845738,rrub_460846526,rrub_460844667,rrub_460845715,rrub_460845714,rrub_460849146,rrub_460843710,rrub_460849958,rrub_460845986,rrub_460846502,rrub_460848252,rrub_4608…	glycosyl hydrolase::Glycoside hydrolase, family 29, subgroup::Alpha-L-fucosidase::alpha-L-fucosidase precursor::glycosyl hydrolase::glycosyl hydrolase::Glycoside hydrolase, family 29::fucosidase, alpha-L- 2, plasma::Glycoside hydrolase, family 29, subgroup::Glycoside hydrolase, family 29, subgroup::Alpha-L-fucosidase::Glycoside hydrolase, family 29::glycosyl hydrolase::Glycoside hydrolase, family…
rrub_NCIM00017	23	rrub_460843429,rrub_460846691,rrub_460845177,rrub_460849675,rrub_460843626,rrub_460849616,rrub_460849900,rrub_460843150,rrub_460843974,rrub_460844659,rrub_460844470,rrub_460843838,rrub_460848608,rrub_460845861,rrub_460849368,rrub_460848168,rrub_460843956,rrub_460847025,rrub_460845303,rrub_460845544,rrub_460845044,rrub_460847772,rrub_460844148	protein containing DUF1080::protein containing DUF1080::protein containing DUF1080::secreted protein containing DUF1080::secreted protein containing DUF1080::protein containing DUF1080::protein containing DUF1080::secreted protein containing DUF1080::secreted protein containing DUF1080::protein containing DUF1080::protein containing DUF1080::alpha-L-rhamnosidase::secreted protein containing DUF10…
rrub_NCIM00018	22	rrub_460845020,rrub_460844514,rrub_460847428,rrub_460843516,rrub_460847456,rrub_460844681,rrub_460844264,rrub_460848944,rrub_460847255,rrub_460847389,rrub_460847382,rrub_460842720,rrub_460849899,rrub_460843732,rrub_460846172,rrub_460846349,rrub_460847213,rrub_460843302,rrub_460847379,rrub_460847412,rrub_460843097,rrub_460844150	transmembrane drug efflux protein::RND family efflux transporter::heavy metal efflux pump, CzcA family::multidrug resistance protein::multidrug resistance protein::multidrug efflux RND transporter MexF::acriflavin resistance plasma membrane protein::cation/multidrug efflux pump::heavy metal efflux pump, CzcA family::heavy metal efflux pump, CzcA family::heavy metal efflux pump, CzcA family::multi…
rrub_NCIM00019	20	rrub_460845458,rrub_460847941,rrub_460843567,rrub_460848378,rrub_460848376,rrub_460848373,rrub_460842940,rrub_460844043,rrub_460848369,rrub_460849930,rrub_460849712,rrub_460847657,rrub_460846357,rrub_460847229,rrub_460848908,rrub_460844010,rrub_460848318,rrub_460848313,rrub_460844207,rrub_460846042	dTDP-glucose-4,6-dehydratase, partial::GDP-mannose 4,6-dehydratase::UDP-glucose 4-epimerase::NAD-dependent epimerase/dehydratase::NAD-dependent epimerase/dehydratase::GDP-mannose 4,6-dehydratase::nucleotide sugar epimerase::dTDP-D-glucose-4,6-dehydratase::NAD-dependent epimerase/dehydratase::oxidoreductase::UDP-glucose 4-epimerase::NAD-dependent epimerase/dehydratase::NAD(P)H steroid dehydrogenas…
rrub_NCIM00020	20	rrub_460848110,rrub_460847848,rrub_460847847,rrub_460847846,rrub_460849060,rrub_460845282,rrub_460843543,rrub_460847047,rrub_460849858,rrub_460844841,rrub_460844709,rrub_460844924,rrub_460843279,rrub_460845331,rrub_460845330,rrub_460846562,rrub_460843787,rrub_460843531,rrub_460843533,rrub_460843546	glycosyl transferase, group 2 family protein::glycosyl transferase family protein::glycosyl transferase, family 2::glycosyl transferase, group 2 family protein::glycosyl transferase family 2::glycosyl transferase family 2::membrane protein containing Glycosyl transferase, family 2 domain protein::glycosyltransferase protein::glycosyl transferase, group 2 family protein::glycosyl transferase, grou…
rrub_NCIM00021	20	rrub_460849301,rrub_460844998,rrub_460844162,rrub_460844705,rrub_460849485,rrub_460848721,rrub_460847702,rrub_460846386,rrub_460847005,rrub_460849429,rrub_460845690,rrub_460848803,rrub_460846143,rrub_460843098,rrub_460845955,rrub_460844570,rrub_460846319,rrub_460845365,rrub_460847514,rrub_460842757	two component, sigma54 specific, transcriptional regulator, Fis family::two component, sigma54 specific, transcriptional regulator, Fis family::two component, sigma54 specific, transcriptional regulator, Fis family::two component, sigma54 specific, Fis family transcriptional regulator::two component, sigma54 specific, transcriptional regulator, Fis family::two component, sigma54 specific, transcr…
rrub_NCIM00022	17	rrub_460844855,rrub_460844421,rrub_460845740,rrub_460844186,rrub_460847525,rrub_460843485,rrub_460847537,rrub_460848735,rrub_460843557,rrub_460847571,rrub_460846287,rrub_460843137,rrub_460848770,rrub_460843842,rrub_460848028,rrub_460847979,rrub_460843715	alpha/beta hydrolase domain-containing protein::Alpha/beta hydrolase fold-3 domain protein::lipase/esterase::lipase/esterase::esterase/lipase-like protein::lipase/esterase::lipase/esterase::lipase/esterase::lipase/esterase::lipase/esterase::Alpha/beta hydrolase fold-3 domain protein::lipase/esterase::Esterase/lipase-like protein::lipase/esterase::lipase/esterase::lipase/esterase::lipase/esterase
rrub_NCIM00023	17	rrub_460846849,rrub_460846119,rrub_460848239,rrub_460848231,rrub_460849219,rrub_460849279,rrub_460844645,rrub_460848090,rrub_460849278,rrub_460846389,rrub_460849366,rrub_460846511,rrub_460846512,rrub_460849569,rrub_460849341,rrub_460845822,rrub_460848668	beta-galactosidase::glycoside hydrolase family 2::glycoside hydrolase family 2::glycoside hydrolase family 2::glycoside hydrolase family 42 protein::glycoside hydrolase family 2::glycoside hydrolase family 2::glycoside hydrolase family 2::glycoside hydrolase family 2::glycoside hydrolase family 2::glycoside hydrolase family 2::glycoside hydrolase family 2::glycoside hydrolase family 2::glycoside …
rrub_NCIM00024	17	rrub_460844356,rrub_460847985,rrub_460844533,rrub_460843254,rrub_460843990,rrub_460842975,rrub_460849043,rrub_460843128,rrub_460847103,rrub_460847019,rrub_460847202,rrub_460847690,rrub_460847594,rrub_460845947,rrub_460846588,rrub_460847094,rrub_460846304	magnesium chelatase, subunit I::MoxR-related protein::methanol dehydrogenase regulator (moxR)-like protein::methanol dehydrogenase regulator (moxR)-like protein::methanol dehydrogenase regulatory protein::methanol dehydrogenase regulator (moxR)-like protein::methanol dehydrogenase regulator (moxR)-like protein::methanol dehydrogenase regulatory protein::methanol dehydrogenase regulator (moxR)-lik…
rrub_NCIM00025	16	rrub_460848699,rrub_460848737,rrub_460848738,rrub_460846011,rrub_460844797,rrub_460848403,rrub_460846744,rrub_460845081,rrub_460849764,rrub_460849363,rrub_460847100,rrub_460843273,rrub_460849410,rrub_460846795,rrub_460845225,rrub_460847067	heme-binding protein::membrane-bound dehydrogenase domain protein::membrane-bound dehydrogenase domain protein::heme-binding protein::heme-binding protein::large, multifunctional secreted protein::membrane-bound dehydrogenase domain protein::membrane-bound dehydrogenase domain protein::membrane-bound dehydrogenase domain protein::membrane-bound dehydrogenase domain protein::heme-binding protein::…
rrub_NCIM00026	16	rrub_460844422,rrub_460844408,rrub_460844430,rrub_460845753,rrub_460844413,rrub_460844410,rrub_460845737,rrub_460849047,rrub_460845850,rrub_460845147,rrub_460846765,rrub_460843916,rrub_460843464,rrub_460848002,rrub_460846095,rrub_460842685	fibronectin type III domain protein::dienelactone hydrolase domain protein::fibronectin type III domain protein::large secreted protein::secreted protein containing Dienelactone hydrolase domain protein::glycoside hydrolase family 95::glycoside hydrolase family 95::fibronectin type III domain protein::large secreted protein::Alpha-L-fucosidase::putative secreted protein::glycoside hydrolase famil…
rrub_NCIM00027	14	rrub_460844193,rrub_460844693,rrub_460844178,rrub_460849470,rrub_460844736,rrub_460843708,rrub_460847813,rrub_460849923,rrub_460847664,rrub_460848702,rrub_460843138,rrub_460844458,rrub_460843271,rrub_460847572	secreted protein containing DUF1552::secreted protein containing DUF1552::secreted protein containing DUF1552::protein containing DUF1552::secreted protein containing DUF1552::secreted protein containing DUF1552::secreted protein containing DUF1552::protein containing DUF1552::protein containing DUF1552::secreted protein containing DUF1552::protein containing DUF1552::secreted protein containing …
rrub_NCIM00028	14	rrub_460844194,rrub_460844692,rrub_460844179,rrub_460844737,rrub_460849469,rrub_460843707,rrub_460847814,rrub_460849924,rrub_460848703,rrub_460843139,rrub_460849849,rrub_460844459,rrub_460843272,rrub_460847573	planctomycete cytochrome C domain protein::planctomycete cytochrome C domain protein::secreted protein containing PA14::planctomycete cytochrome C domain protein::protein containing DUF1588::planctomycete cytochrome C domain protein::planctomycete cytochrome C domain protein::planctomycete cytochrome C domain protein::planctomycete cytochrome C domain protein::planctomycete cytochrome C domain pr…
rrub_NCIM00029	14	rrub_460844432,rrub_460846104,rrub_460845751,rrub_460849265,rrub_460849277,rrub_460844723,rrub_460844724,rrub_460843728,rrub_460846516,rrub_460843682,rrub_460849571,rrub_460846515,rrub_460845932,rrub_460848069	Glycoside hydrolase, family 43::putative secreted protein::putative secreted protein::Glycoside hydrolase, family 43::hypothetical protein RRSWK_00439::Glycoside hydrolase, family 43::Glycoside hydrolase, family 43::Glycoside hydrolase, family 43::Glycoside hydrolase, family 43::hypothetical protein RRSWK_06352::Glycoside hydrolase, family 43::putative secreted protein::hypothetical protein RRSWK…
rrub_NCIM00030	14	rrub_460847150,rrub_460847886,rrub_460847453,rrub_460844326,rrub_460843288,rrub_460845610,rrub_460849561,rrub_460842827,rrub_460842829,rrub_460849661,rrub_460842663,rrub_460848904,rrub_460846414,rrub_460849682	long-chain fatty-acid-CoA ligase::2-amino-3-ketobutyrate coenzyme A ligase::acetyl-coenzyme A synthetase::8-amino-7-oxononanoate synthase::surfactin synthetase::2-acyl-glycerophospho-ethanolamine acyltransferase::non-ribosomal peptide synthetase::non-ribosomal peptide synthetase::non-ribosomal peptide synthetase::beta-ketoacyl synthase::Beta-ketoacyl synthase::non-ribosomal peptide synthetase::lo…
rrub_NCIM00031	12	rrub_460847093,rrub_460847986,rrub_460843255,rrub_460847536,rrub_460843628,rrub_460842976,rrub_460844357,rrub_460846825,rrub_460847020,rrub_460847201,rrub_460847595,rrub_460844361	protein containing DUF58::protein containing DUF58::protein containing DUF58::protein containing DUF58::protein containing DUF58::protein containing DUF58::protein containing DUF58::protein containing DUF58::von Willebrand factor, type A domain protein::hypothetical protein RRSWK_02810::hypothetical protein RRSWK_02333::membrane protein containing DUF58
rrub_NCIM00032	13	rrub_460845895,rrub_460846117,rrub_460846112,rrub_460845742,rrub_460845743,rrub_460845749,rrub_460845754,rrub_460846495,rrub_460845731,rrub_460845739,rrub_460845707,rrub_460845716,rrub_460846105	hypothetical protein RRSWK_03989::hypothetical protein RRSWK_03843::putative secreted protein::hypothetical protein RRSWK_04285::putative secreted protein::hypothetical protein RRSWK_04292::putative secreted protein::putative secreted protein::putative secreted protein::putative secreted protein::putative secreted protein::putative secreted protein::putative secreted protein
rrub_NCIM00033	11	rrub_460848040,rrub_460848458,rrub_460847925,rrub_460848906,rrub_460848758,rrub_460849560,rrub_460848905,rrub_460848305,rrub_460843889,rrub_460848201,rrub_460848204	type I polyketide synthase WcbR::3-oxoacyl-(acyl-carrier-protein) synthase II::beta keto-acyl synthase::beta-ketoacyl synthase::3-oxoacyl-(acyl-carrier-protein) synthase II::polyketide synthase type I::beta-ketoacyl synthase::3-oxoacyl-[acyl-carrier-protein] synthase II::3-oxoacyl-(acyl-carrier-protein) synthase 2::3-oxoacyl-(acyl-carrier-protein) synthase 2::malonyl CoA-acyl carrier protein tran…
rrub_NCIM00034	12	rrub_460842924,rrub_460846670,rrub_460844159,rrub_460846656,rrub_460849715,rrub_460848839,rrub_460848920,rrub_460849772,rrub_460845891,rrub_460847314,rrub_460849550,rrub_460843936	GGDEF domain-containing protein::diguanylate cyclase::Diguanylate cyclase, predicted domain protein::two-component response regulator::response regulatory protein::response regulator PleD::response regulator receiver modulated diguanylate cyclase::sensory box/GGDEF domain/EAL domain protein::diguanylate cyclase::protein containing Diguanylate cyclase, predicted::protein containing Diguanylate cyc…
rrub_NCIM00035	11	rrub_460849010,rrub_460848083,rrub_460849457,rrub_460846758,rrub_460849361,rrub_460845219,rrub_460849358,rrub_460847788,rrub_460849505,rrub_460847792,rrub_460845498	secreted protein containing ASPIC/UnbV domain protein::ASPIC/UnbV domain-containing protein::ASPIC/UnbV domain-containing protein::ASPIC/UnbV domain-containing protein::ASPIC/UnbV domain-containing protein::ASPIC/UnbV domain-containing protein::ASPIC/UnbV domain-containing protein::ASPIC/UnbV domain-containing protein::ASPIC/UnbV domain-containing protein::ASPIC/UnbV domain-containing protein::AS…
rrub_NCIM00036	11	rrub_460843353,rrub_460848448,rrub_460843094,rrub_460848452,rrub_460849063,rrub_460846541,rrub_460843609,rrub_460848368,rrub_460846359,rrub_460842899,rrub_460847090	translation initiation factor IF-2::translation elongation factor Tu::translation elongation factor Tu::bifunctional sulfate adenylyltransferase subunit 1/adenylylsulfate kinase protein::Adenylylsulfate kinase::GTP-binding protein LepA::translation elongation factor G::GTP-binding protein TypA/BipA::GTP-binding protein LepA::translation elongation factor G::translation elongation factor G
rrub_NCIM00037	10	rrub_460844981,rrub_460844980,rrub_460849076,rrub_460845292,rrub_460844979,rrub_460845641,rrub_460846355,rrub_460848922,rrub_460846356,rrub_460849407	type IV-A pilus assembly ATPase PilB::twitching motility protein PilT::type II/IV secretion system protein, TadA subfamily protein::general secretion pathway protein E::type IV-A pilus assembly ATPase PilB::type IV-A pilus assembly ATPase PilB::twitching motility protein PilT::type IV-A pilus assembly ATPase PilB::type II secretion system protein E::type II secretion system protein E
rrub_NCIM00038	10	rrub_460844776,rrub_460849536,rrub_460849538,rrub_460844768,rrub_460849000,rrub_460846710,rrub_460847992,rrub_460847726,rrub_460847780,rrub_460843662	RNA polymerase sigma factor cnrH::RNA polymerase, sigma-24 subunit, ECF subfamily::RNA polymerase, sigma-24 subunit, ECF subfamily::RNA polymerase, sigma-24 subunit, ECF subfamily::RNA polymerase sigma-E type, Rhodopirellula baltica::RNA polymerase sigma-E type, Rhodopirellula baltica::RNA polymerase sigma-E type, Rhodopirellula baltica::RNA polymerase sigma-E type, Rhodopirellula baltica::RNA po…
rrub_NCIM00039	10	rrub_460849071,rrub_460848507,rrub_460849674,rrub_460843378,rrub_460847194,rrub_460843709,rrub_460847225,rrub_460845201,rrub_460846040,rrub_460849689	alkyl hydroperoxide reductase/ Thiol specific antioxidant/ Mal allergen::FixW protein::Thiol-disulfide oxidoreductase::Redoxin domain protein::Thiol-disulfide oxidoreductase::thioredoxin family protein::FixW protein::thioredoxin::secreted protein containing Redoxin domain protein::alkyl hydroperoxide reductase/ Thiol specific antioxidant/ Mal allergen
rrub_NCIM00040	10	rrub_460844680,rrub_460848053,rrub_460846469,rrub_460846350,rrub_460849898,rrub_460847212,rrub_460843303,rrub_460848132,rrub_460844151,rrub_460843334	RND family efflux transporter MFP subunit::efflux transporter, RND family, MFP subunit::efflux transporter, RND family, MFP subunit::efflux transporter, RND family, MFP subunit::efflux transporter, RND family, MFP subunit::efflux transporter, RND family, MFP subunit::efflux transporter, RND family, MFP subunit::secretion protein HlyD family protein::efflux transporter, RND family, MFP subunit::ef…
rrub_NCIM00041	10	rrub_460847420,rrub_460847624,rrub_460846672,rrub_460846025,rrub_460845410,rrub_460845411,rrub_460845412,rrub_460844952,rrub_460848361,rrub_460843586	protease Do::Peptidase S1 and S6, chymotrypsin/Hap domain protein::peptidase S1C, Do::peptidase S1C, Do::peptidase S1 and S6 chymotrypsin/Hap::secreted protein containing PDZ/DHR/GLGF domain protein::protease do::serine protease Do::serine protease::peptidase S1C, Do
rrub_NCIM00042	10	rrub_460847242,rrub_460849260,rrub_460844912,rrub_460844047,rrub_460847122,rrub_460847051,rrub_460843902,rrub_460844919,rrub_460844049,rrub_460844209	Maa (Maltose O-acetyltransferase)::transferase hexapeptide repeat containing protein::serine O-acetyltransferase::bifunctional isomerase / acetyl transferase::hexapeptide transferase family protein::O-acetyltransferase::ferripyochelin-binding protein::galactoside acetyltransferase::transferase hexapeptide repeat containing protein::Sialic acid O-acyltransferase, NeuD
rrub_NCIM00043	10	rrub_460842749,rrub_460847219,rrub_460844521,rrub_460849137,rrub_460844675,rrub_460847697,rrub_460843913,rrub_460846103,rrub_460845140,rrub_460844787	RNA polymerase sigma factor Y::ECF sigma factor::RNA polymerase sigma-H factor::RNA polymerase sigma-H factor::RNA polymerase sigma-H factor::RNA polymerase sigma-70 domain protein::extracytoplasmic function alternative sigma factor::RNA polymerase sigma-H factor::RNA polymerase sigma factor Y::extracytoplasmic function alternative sigma factor
rrub_NCIM00044	10	rrub_460847195,rrub_460846829,rrub_460846749,rrub_460842981,rrub_460844032,rrub_460842980,rrub_460846601,rrub_460844632,rrub_460848797,rrub_460845919	putative secreted protein::putative secreted protein::hypothetical protein RRSWK_03096::putative secreted protein::putative secreted protein::putative secreted protein::hypothetical protein RRSWK_03348::putative membrane protein::hypothetical protein RRSWK_01048::hypothetical protein RRSWK_04013
rrub_NCIM00045	9	rrub_460847857,rrub_460846096,rrub_460848938,rrub_460849126,rrub_460844068,rrub_460848939,rrub_460848937,rrub_460846894,rrub_460847650	H repeat-associated protein, partial::transposase IS4 family protein::transposase::transposase IS4 family protein::hypothetical protein RRSWK_05845::transposase ISAs1 family protein::transposase::transposase IS4 family protein, partial::transposase IS4 family protein
rrub_NCIM00046	9	rrub_460846214,rrub_460846667,rrub_460847293,rrub_460849612,rrub_460845945,rrub_460849450,rrub_460849164,rrub_460848614,rrub_460845940	pyridine nucleotide-disulfide oxidoreductase::secreted protein-putative xanthan lyase::Glucose-inhibited division protein A-related protein::secreted protein, putative xanthan lyase::pyridine nucleotide-disulfide oxidoreductase::Lipase, GDSL domain protein::pyridine nucleotide-disulfide oxidoreductase::secreted protein, putative xanthan lyase::fumarate reductase/succinate dehydrogenase flavoprote…
rrub_NCIM00047	9	rrub_460847899,rrub_460847421,rrub_460843199,rrub_460848984,rrub_460849708,rrub_460849343,rrub_460845874,rrub_460849422,rrub_460846045	heavy metal translocating P-type ATPase::heavy metal-(Cd/Co/Hg/Pb/Zn)-translocating P-type ATPase::ATPase, E1-E2 type:copper-translocating P-type ATPase:heavy metal translocating P-type ATPase::cation-transporting ATPase, E1-E2 family::heavy metal translocating P-type ATPase::cation transport ATPase::plasma-membrane proton-efflux P-type ATPase::putative P-type cation-transporting ATPase::heavy me…
rrub_NCIM00048	9	rrub_460842771,rrub_460849049,rrub_460845703,rrub_460847675,rrub_460849705,rrub_460849846,rrub_460846989,rrub_460847908,rrub_460843658	ATP-dependent DNA helicase RecQ::ATP-dependent DNA helicase, RecQ family::ATP-dependent DNA helicase RecQ::cold-shock deAd-box protein a::DEAD/DEAH box helicase domain-containing protein::DEAD/DEAH box helicase domain-containing protein::DEAD/DEAH box helicase domain-containing protein::DEAD/H associated domain protein::ATP-dependent DNA helicase RecQ
rrub_NCIM00049	9	rrub_460845004,rrub_460847532,rrub_460845394,rrub_460846294,rrub_460849364,rrub_460848160,rrub_460844481,rrub_460843875,rrub_460845937	sodium/glucose cotransport protein::SSS sodium solute transporter superfamily::sodium/solute symporter family protein::transporter, SSS family protein::symporter YidK::solute carrier family 5, member 3::Na+/solute symporter::sodium/solute symporter family protein glucose transporter::Na+/solute symporter
rrub_NCIM00050	14	rrub_460846332,rrub_460847423,rrub_460849662,rrub_460842971,rrub_460847270,rrub_460845380,rrub_460844273,rrub_460842872,rrub_460846750,rrub_460843822,rrub_460843474,rrub_460846771,rrub_460848105,rrub_460845810	RNA polymerase sigma factor sigW::RNA polymerase ECF-type sigma factor::RNA polymerase sigma-H factor::RNA polymerase sigma factor 70, region 4 type 2 domain protein::RNA polymerase sigma-70::RNA polymerase sigma-70 factor::RNA polymerase ECF-type sigma factor::RNA polymerase, sigma-24 subunit, ECF subfamily::RNA polymerase sigma factor RpoE::RNA polymerase ECF-type sigma factor::ECF family RNA p…
rrub_NCIM00051	8	rrub_460849238,rrub_460847887,rrub_460846323,rrub_460848055,rrub_460844732,rrub_460849269,rrub_460847238,rrub_460846161	Alcohol dehydrogenase zinc-binding domain protein::L-threonine 3-dehydrogenase::Alcohol dehydrogenase GroES domain protein::zinc-containing alcohol dehydrogenase superfamily protein::zinc-binding dehydrogenase family oxidoreductase::alcohol dehydrogenase GroES domain protein::formaldehyde dehydrogenase, glutathione- independent::sorbitol dehydrogenase
rrub_NCIM00052	8	rrub_460845774,rrub_460847503,rrub_460849134,rrub_460846728,rrub_460845264,rrub_460847912,rrub_460848817,rrub_460843403	cysteine desulfurase IscS::cysteine desulfurase family protein::isopenicillin-N epimerase::cysteine desulfurase, SufS subfamily::nifS protein::cysteine desulfurase family protein::aminotransferase class V::aminotransferase class V
rrub_NCIM00053	8	rrub_460846054,rrub_460849821,rrub_460849006,rrub_460847282,rrub_460847497,rrub_460848563,rrub_460843107,rrub_460847795	RNA polymerase sigma-70 ECF-like protein::RNA polymerase sigma-70 ECF-like protein::RNA polymerase sigma-70 domain protein::RNA polymerase sigma-70 ECF-like protein::RNA polymerase sigma-70::hypothetical protein RRSWK_01440::RNA polymerase sigma-70 ECF-like protein::RNA polymerase sigma-70 ECF-like protein
rrub_NCIM00054	8	rrub_460846434,rrub_460843504,rrub_460849739,rrub_460842884,rrub_460842882,rrub_460843268,rrub_460845304,rrub_460843525	protein containing DUF1568::protein containing DUF1568, partial::protein containing DUF1568::protein containing DUF1568::hypothetical protein RRSWK_06920::protein containing DUF1568, partial::protein containing DUF1568::protein containing DUF1568
rrub_NCIM00055	7	rrub_460842809,rrub_460849267,rrub_460844706,rrub_460843038,rrub_460849317,rrub_460845512,rrub_460848740	succinate-semialdehyde dehydrogenase::succinate-semialdehyde dehydrogenase I::aldehyde dehydrogenase (NAD) family protein::bifunctional proline dehydrogenase/delta-1-pyrroline-5-carboxylate dehydrogenase::succinate-semialdehyde dehydrogenase (NAD(P)+)::NAD-dependent aldehyde dehydrogenase::aldehyde dehydrogenase
rrub_NCIM00056	7	rrub_460845649,rrub_460848987,rrub_460844735,rrub_460843301,rrub_460844005,rrub_460843795,rrub_460849339	glycogen branching enzyme::glycogen debranching enzyme GlgX::glycogen branching enzyme::isoamylase::malto-oligosyltrehalose trehalohydrolase::glycogen debranching enzyme GlgX::glycogen branching enzyme
rrub_NCIM00057	7	rrub_460845483,rrub_460848952,rrub_460843381,rrub_460844083,rrub_460847342,rrub_460848579,rrub_460845968	Carbon storage regulator::Carbon storage regulator::Carbon storage regulator::Carbon storage regulator::Carbon storage regulator::Carbon storage regulator::Carbon storage regulator
rrub_NCIM00058	7	rrub_460843752,rrub_460845734,rrub_460845426,rrub_460845387,rrub_460847812,rrub_460848151,rrub_460845036	putative secreted protein::putative secreted protein::putative secreted protein::signal peptide protein::putative secreted protein::putative secreted protein::hypothetical protein RRSWK_04812
rrub_NCIM00059	7	rrub_460842701,rrub_460847859,rrub_460847861,rrub_460847860,rrub_460848566,rrub_460849994,rrub_460848564	ankyrin-like protein, partial::ankyrin-like protein::Ankyrin repeat-like protein, partial::ankyrin-like protein::ankyrin repeat protein, partial::ankyrin repeat-containing protein, partial::ankyrin repeat-containing protein
rrub_NCIM00060	7	rrub_460848535,rrub_460848622,rrub_460842737,rrub_460844446,rrub_460848042,rrub_460845960,rrub_460847147	outer membrane channel protein::hypothetical protein RRSWK_01325::outer membrane efflux protein::outer membrane efflux protein::outer membrane efflux protein::putative secreted protein::outer membrane efflux protein
rrub_NCIM00061	7	rrub_460847339,rrub_460845913,rrub_460845435,rrub_460842954,rrub_460846888,rrub_460846156,rrub_460844873	MscS Mechanosensitive ion channel::transporter, small conductance mechanosensitive ion channel family protein::MscS Mechanosensitive ion channel::mechanosensitive ion channel protein::MscS Mechanosensitive ion channel::MscS Mechanosensitive ion channel::mechanosensitive ion channel protein MscS
rrub_NCIM00062	7	rrub_460846459,rrub_460844051,rrub_460844063,rrub_460847865,rrub_460845840,rrub_460842729,rrub_460842728	hypothetical protein RRSWK_03445::transposase IS204/IS1001/IS1096/IS1165 family protein::transposase IS204/IS1001/IS1096/IS1165 family protein::transposase IS204/IS1001/IS1096/IS1165 family protein::transposase IS204/IS1001/IS1096/IS1165 family protein::transposase IS204/IS1001/IS1096/IS1165 family protein::transposase
rrub_NCIM00063	7	rrub_460848850,rrub_460846017,rrub_460848501,rrub_460845130,rrub_460848114,rrub_460849332,rrub_460845762	dihydrolipoyl dehydrogenase::dihydrolipoamide dehydrogenase::soluble pyridine nucleotide transhydrogenase::pyridine nucleotide-disulfide oxidoreductase family protein::pyridine nucleotide-disulfide oxidoreductase dimerization region::regulatory protein::nitrite reductase
rrub_NCIM00064	7	rrub_460849524,rrub_460849813,rrub_460849439,rrub_460845671,rrub_460845060,rrub_460845058,rrub_460849517	F0F1 ATP synthase subunit alpha::transcription termination factor Rho::transcription termination factor Rho::flagellum-specific ATP synthase::F0F1 ATP synthase subunit beta::F0F1 ATP synthase subunit alpha::F0F1 ATP synthase subunit beta
rrub_NCIM00065	7	rrub_460843375,rrub_460849630,rrub_460847482,rrub_460848768,rrub_460847118,rrub_460843893,rrub_460847143	RNA polymerase sigma factor whiG::RNA polymerase sigma factor rpoD::RNA polymerase sigma 70::RNA polymerase, sigma 70 subunit, RpoD subfamily::sigma-70 factor::RNA polymerase, sigma 70 subunit, RpoD subfamily::transcription initiation factor sigma 70
rrub_NCIM00066	7	rrub_460848591,rrub_460846622,rrub_460848595,rrub_460848590,rrub_460848583,rrub_460848589,rrub_460848588	protein containing DUF1254::protein containing DUF1214::membrane protein containing DUF1254::secreted protein containing DUF1254::protein containing DUF1254::secreted protein containing DUF1254::secreted protein containing DUF1254
rrub_NCIM00067	7	rrub_460846519,rrub_460845796,rrub_460842815,rrub_460842816,rrub_460846528,rrub_460844699,rrub_460849276	glycoside hydrolase family 16::glycoside hydrolase family 16::glycoside hydrolase family protein::glycoside hydrolase family 16::glycoside hydrolase family protein::hydrolase family protein::glycoside hydrolase family 16
rrub_NCIM00068	7	rrub_460849305,rrub_460849306,rrub_460846256,rrub_460846381,rrub_460842666,rrub_460849316,rrub_460845333	zinc-binding alcohol dehydrogenase family protein::zinc-binding alcohol dehydrogenase::Alcohol dehydrogenase zinc-binding domain protein::Alcohol dehydrogenase zinc-binding domain protein::Alcohol dehydrogenase zinc-binding domain protein::NADP-dependent oxidoreductase::zinc-containing alcohol dehydrogenase superfamily protein
rrub_NCIM00069	6	rrub_460846206,rrub_460845586,rrub_460844406,rrub_460849467,rrub_460847121,rrub_460847914	alkaline phosphatase D::Phosphodiesterase/alkaline phosphatase D-like protein::Phosphodiesterase/alkaline phosphatase D-like protein::isomerase::6-phosphogluconolactonase::Phosphodiesterase/alkaline phosphatase D
rrub_NCIM00070	6	rrub_460845827,rrub_460846030,rrub_460846201,rrub_460846202,rrub_460846693,rrub_460843898	transposase for insertion sequence element, partial::transposase for insertion sequence element, partial::transposase for insertion sequence element::IS5 family transposase::transposase for insertion sequence element, partial::transposase for insertion sequence element, partial
rrub_NCIM00071	6	rrub_460848948,rrub_460849929,rrub_460847669,rrub_460845473,rrub_460845211,rrub_460845494	signal peptide protein::signal peptide protein::signal peptide protein::signal peptide protein::signal peptide protein::signal peptide protein
rrub_NCIM00072	6	rrub_460845906,rrub_460848532,rrub_460847283,rrub_460846259,rrub_460844442,rrub_460848626	peptidase, M50 family::membrane protein containing Peptidase M50 domain protein::M50 family peptidase::peptidase, M50 family::peptidase, M50 family protein::peptidase, M50 family
rrub_NCIM00073	6	rrub_460844729,rrub_460844668,rrub_460849384,rrub_460845119,rrub_460843076,rrub_460847984	alpha-glucosidase::alpha-glucosidase::alpha-glucosidase::alpha-glucosidase::alpha-glucosidase::alpha-glucosidase
rrub_NCIM00074	6	rrub_460845917,rrub_460846510,rrub_460844630,rrub_460848274,rrub_460843668,rrub_460845423	biopolymer transport ExbB-related protein::MotA/TolQ/ExbB proton channel::tolQ-type transport protein::TolQ-type transport protein::MotA/TolQ/ExbB proton channel::MotA/TolQ/ExbB proton channel
rrub_NCIM00075	6	rrub_460849124,rrub_460846627,rrub_460848651,rrub_460847652,rrub_460845829,rrub_460848514	hypothetical protein RRSWK_00857, partial::hypothetical protein RRSWK_03312::hypothetical protein RRSWK_01322::hypothetical protein RRSWK_02302::hypothetical protein RRSWK_04086, partial::hypothetical protein RRSWK_01451
rrub_NCIM00076	6	rrub_460843174,rrub_460846037,rrub_460849244,rrub_460847337,rrub_460846098,rrub_460849024	transposase, partial::hypothetical protein RRSWK_03889::hypothetical protein RRSWK_00406::hypothetical protein RRSWK_02612, partial::hypothetical protein RRSWK_03824::hypothetical protein RRSWK_01016
rrub_NCIM00077	6	rrub_460849798,rrub_460846160,rrub_460846158,rrub_460848909,rrub_460847416,rrub_460845954	macrolide export ATP-binding/permease protein MacB::ABC transporter integral membrane protein::ABC transporter integral membrane protein::membrane protein containing DUF214, permase predicted::membrane protein containing DUF214, permase predicted::ABC transporter permease protein
rrub_NCIM00078	6	rrub_460843428,rrub_460846325,rrub_460848256,rrub_460849286,rrub_460848729,rrub_460844626	aldo/keto reductase family oxidoreductase::oxidoreductase::aldo/keto reductase family oxidoreductase TAS::aldo/keto reductase::oxidoreductase, aldo/keto reductase family::oxidoreductase, aldo/keto reductase family
rrub_NCIM00079	6	rrub_460847199,rrub_460842978,rrub_460849432,rrub_460846827,rrub_460847598,rrub_460843257	putative membrane protein::membrane protein containing DUF1355::protein containing DUF1355::putative membrane protein::membrane protein containing DUF1355::putative membrane protein
rrub_NCIM00080	6	rrub_460849350,rrub_460847384,rrub_460846167,rrub_460842895,rrub_460847777,rrub_460847311	Thioredoxin domain protein::thioredoxin::Thioredoxin::Thioredoxin domain protein::Thioredoxin::thioredoxin
rrub_NCIM00081	6	rrub_460845741,rrub_460843175,rrub_460848402,rrub_460848340,rrub_460849037,rrub_460847574	multi-domain protein::secreted protein containing DUF1080::large multi-functional protein::large multi-functional protein::multi-domain protein::multi-domain protein
rrub_NCIM00082	5	rrub_460849828,rrub_460847460,rrub_460849716,rrub_460848298,rrub_460848860	pseudouridine synthase, RluA family::ribosomal large subunit pseudouridine synthase D::ribosomal large subunit pseudouridine synthase D::ribosomal large subunit pseudouridine synthase A::ribosomal large subunit pseudouridine synthase D
rrub_NCIM00083	5	rrub_460849863,rrub_460848711,rrub_460847934,rrub_460847933,rrub_460849028	Transposase, Rhodopirellula-type::Transposase, Rhodopirellula-type::Transposase, Rhodopirellula-type::Transposase, Rhodopirellula-type::hypothetical protein RRSWK_01020
rrub_NCIM00084	5	rrub_460843176,rrub_460845923,rrub_460845096,rrub_460844842,rrub_460844835	hydroxypyruvate isomerase::sugar phosphate isomerase/epimerase::xylose isomerase domain-containing protein::Xylose isomerase domain protein TIM barrel::Xylose isomerase-type TIM barrel domain protein
rrub_NCIM00085	5	rrub_460849017,rrub_460847087,rrub_460844524,rrub_460844618,rrub_460845393	dihydrodipicolinate synthase::dihydrodipicolinate synthase::dihydrodipicolinate synthase::N-acetylneuraminate lyase subunit protein::N-acetylneuraminate lyase
rrub_NCIM00086	5	rrub_460848723,rrub_460849599,rrub_460848419,rrub_460849479,rrub_460845032	pyruvate, phosphate dikinase::phosphoenolpyruvate-protein phosphotransferase::phosphoenolpyruvate-protein phosphotransferase::phosphoenolpyruvate synthase::pyruvate phosphate dikinase PEP/pyruvate- binding protein
rrub_NCIM00087	5	rrub_460843285,rrub_460844657,rrub_460844656,rrub_460844654,rrub_460848669	alfa-L-rhamnosidase::Bacterial alpha-L-rhamnosidase domain protein::alfa-L-rhamnosidase::alpha-L-rhamnosidase::glycoside hydrolase, family 78
rrub_NCIM00088	5	rrub_460844426,rrub_460849449,rrub_460846193,rrub_460846764,rrub_460849021	sialic acid-specific 9-O-acetylesterase::sialic acid-specific 9-O-acetylesterase::sialic acid-specific 9-O-acetylesterase::sialic acid-specific 9-O-acetylesterase::Sialate O-acetylesterase
rrub_NCIM00089	5	rrub_460849530,rrub_460842772,rrub_460846013,rrub_283465131,rrub_460844310	L-lactate dehydrogenase 2::malate dehydrogenase, NAD-dependent::L-lactate/malate dehydrogenase::malate dehydrogenase::L-lactate/malate dehydrogenase
rrub_NCIM00090	5	rrub_460843295,rrub_460847056,rrub_460849193,rrub_460847942,rrub_460845815	undecaprenyl-phosphate galactosephosphotransferase::sugar transferase, PEP-CTERM system associated::Bacterial sugar transferase domain protein::Exopolysaccharide biosynthesis polyprenyl glycosylphosphotransferase::capsular polysaccharide biosynthesis glycosyltransferase
rrub_NCIM00091	5	rrub_460848698,rrub_460845706,rrub_460849458,rrub_460849948,rrub_460849349	bacterioferritin comigratory protein::redoxin::alkyl hydroperoxide reductase/ Thiol specific antioxidant/ Mal allergen::alkyl hydroperoxide reductase/ Thiol specific antioxidant/ Mal allergen::alkyl hydroperoxide reductase/ Thiol specific antioxidant/ Mal allergen
rrub_NCIM00092	5	rrub_460848084,rrub_460845240,rrub_460843711,rrub_460844650,rrub_460849973	glycoside hydrolase family 2::glycoside hydrolase family 2::putative secreted protein::glycoside hydrolase family 2::hypothetical protein RRSWK_00092
rrub_NCIM00093	5	rrub_460849641,rrub_460846671,rrub_460844208,rrub_460844041,rrub_460844046	ADP-glucose pyrophosphorylase small subunit::Glucose-1-phosphate adenylyltransferase::sugar-phosphate nucleotide transferase::glucose-1-phosphate thymidylyltransferase RmlA::Glucose-1-phosphate thymidylyltransferase, long form
rrub_NCIM00094	5	rrub_460842761,rrub_460845245,rrub_460847516,rrub_460845248,rrub_460845247	proton-translocating NADH-quinone oxidoreductase, chain L::monovalent cation/H+ antiporter subunit D::NADH dehydrogenase::monovalent cation/H+ antiporter subunit D::monovalent cation/H+ antiporter subunit D
rrub_NCIM00095	5	rrub_460847988,rrub_460844359,rrub_460847023,rrub_460847022,rrub_460844360	von Willebrand factor type A (vWA) domain-containing protein::BatA protein::von Willebrand factor type A::BatA protein::BatB
rrub_NCIM00096	5	rrub_460846438,rrub_460849116,rrub_460842616,rrub_460849713,rrub_460847636	Integrase, integron-type, partial::integrase/recombinase::phage integrase family protein, partial::site-specific tyrosine recombinase XerD::phage integrase family protein, partial
rrub_NCIM00097	5	rrub_460843517,rrub_460847455,rrub_460844265,rrub_460842721,rrub_460846173	efflux transporter, RND family, MFP subunit::secretion protein HlyD family protein::RND family efflux transporter MFP subunit::RND family efflux transporter MFP subunit::Membrane-fusion protein
rrub_NCIM00098	4	rrub_460849056,rrub_460849721,rrub_460849777,rrub_460847752	transporter::transporter::TadE-like protein::transporter
rrub_NCIM00099	4	rrub_460847290,rrub_460847291,rrub_460847289,rrub_460846966	protein containing DUF124::protein containing DUF124::protein containing DUF124::protein containing DUF124
rrub_NCIM00100	4	rrub_460845908,rrub_460846260,rrub_460847285,rrub_460848623	alkaline protease secretion protein AprE::alkaline protease secretion protein AprE::phytochrome sensor protein::alkaline protease secretion protein AprE
rrub_NCIM00101	4	rrub_460848536,rrub_460848949,rrub_460844448,rrub_460848750	Pentaxin::outer membrane adhesin like proteiin::Cadherin domain protein, partial::Cadherin
rrub_NCIM00102	4	rrub_460847429,rrub_460843186,rrub_460847376,rrub_460847375	secreted protein, partial::hypothetical protein RRSWK_06633::secreted protein::secreted protein
rrub_NCIM00103	4	rrub_460848992,rrub_460849490,rrub_460847190,rrub_460848983	universal stress protein::universal stress protein::UspA domain protein::universal stress protein
rrub_NCIM00104	4	rrub_460849817,rrub_460846007,rrub_460842965,rrub_460843475	SWF/SNF family helicase::SNF2 helicase associated domain protein::SNF2-like protein::Snf2/Rad54 family helicase
rrub_NCIM00105	4	rrub_460844516,rrub_460847666,rrub_460849551,rrub_460843885	adenosylmethionine-8-amino-7-oxononanoate aminotransferase::glutamate-1-semialdehyde 2,1-aminomutase::Aminotransferase class-III::Aminotransferase class-III
rrub_NCIM00106	4	rrub_460845806,rrub_460844192,rrub_460846645,rrub_460849868	putative secreted protein::secreted protein containing Lipase, GDSL domain protein::putative secreted protein::putative secreted protein
rrub_NCIM00107	4	rrub_460845599,rrub_460844401,rrub_460846484,rrub_460845709	signal transduction histidine kinase::histidine kinase::histidine kinase::coagulation factor 5/8 type domain protein
rrub_NCIM00108	4	rrub_460845914,rrub_460844048,rrub_460848328,rrub_460844206	pleiotropic regulatory protein::glutamine--scyllo-inositol transaminase::DegT/DnrJ/EryC1/StrS aminotransferase::pyridoxal phosphate-dependent enzyme
rrub_NCIM00109	4	rrub_460845420,rrub_460846836,rrub_460846638,rrub_460849698	glutamine amidotransferase of anthranilate synthase::para-aminobenzoate/anthranilate synthase glutamine amidotransferase component II::bifunctional GMP synthase/glutamine amidotransferase protein::carbamoyl phosphate synthase small subunit
rrub_NCIM00110	4	rrub_460846935,rrub_460848891,rrub_460843886,rrub_460843888	Beta-hydroxyacyl-(acyl-carrier-protein) dehydratase FabA/FabZ::beta-hydroxyacyl-ACP dehydratase::hydroxymyristoyl-(acyl carrier protein) dehydratase::hydroxymyristoyl-(acyl carrier protein) dehydratase
rrub_NCIM00111	4	rrub_460847239,rrub_460847002,rrub_460844941,rrub_460847240	metallophosphoesterase::metallophosphoesterase::hypothetical protein RRSWK_05141::diadenosine tetraphosphatase
rrub_NCIM00112	4	rrub_460842660,rrub_460843446,rrub_460849035,rrub_460846540	ROK family protein::ROK family protein::ROK family protein::ROK family protein
rrub_NCIM00113	4	rrub_460847753,rrub_460849055,rrub_460849720,rrub_460849776	von Willebrand factor type A::von Willebrand factor type A::von Willebrand factor type A::von Willebrand factor type A
rrub_NCIM00114	4	rrub_460846845,rrub_460847269,rrub_460843007,rrub_460847324	Forkhead-associated domain protein::Forkhead-associated domain protein::FHA domain containing protein::FHA domain containing protein
rrub_NCIM00115	4	rrub_460843439,rrub_460846815,rrub_460849169,rrub_460845144	peptidase C14 caspase catalytic subunit p20::repeat protein, beta transducin-like protein::repeat protein, beta transducin-like protein::repeat protein
rrub_NCIM00116	4	rrub_460845005,rrub_460846530,rrub_460843805,rrub_460844884	asparaginyl-tRNA synthetase::lysyl-tRNA synthetase-related protein::aspartyl-tRNA synthetase::lysyl-tRNA synthetase
rrub_NCIM00117	4	rrub_460847257,rrub_460847388,rrub_460847411,rrub_460847402	efflux transporter, RND family::MchE protein::MchE protein::TPR repeat-containing protein
rrub_NCIM00118	4	rrub_460846385,rrub_460847584,rrub_460849356,rrub_460849331	peroxidase-related enzyme::alkylhydroperoxidase AhpD family core domain protein::peroxidase-related enzyme::alkylhydroperoxidase
rrub_NCIM00119	4	rrub_460846050,rrub_460847187,rrub_460847186,rrub_460846049	phosphate transport system permease protein::Phosphate transport system permease protein 2::phosphate ABC transporter, inner membrane subunit PstC::phosphate ABC transporter, inner membrane subunit PstA
rrub_NCIM00120	4	rrub_460847528,rrub_460845176,rrub_460842982,rrub_460843819	tolB protein::amidohydrolase::peptidase yuxL::TolB protein (Precursor)
rrub_NCIM00121	4	rrub_460846266,rrub_460847230,rrub_460848903,rrub_460845700	3-oxoacyl-(acyl carrier protein) synthase III::3-oxoacyl-(acyl-carrier-protein) synthase III::3-oxoacyl-[acyl-carrier-protein] synthase III::3-oxoacyl-(acyl carrier protein) synthase III
rrub_NCIM00122	4	rrub_460844435,rrub_460844340,rrub_460843809,rrub_460848685	nitrogen regulatory protein P-II::Nitrogen regulatory protein PII::Nitrogen regulatory protein PII::Nitrogen regulatory protein PII
rrub_NCIM00123	4	rrub_460843648,rrub_460846724,rrub_460849625,rrub_460847357	AAA ATPase central domain protein::cell division protein FtsH::cell division protein FtsH::ATPase, AAA family
rrub_NCIM00124	4	rrub_460842969,rrub_460849711,rrub_460848736,rrub_460849757	signal peptide protein::signal peptide and transmembrane prediction::signal peptide protein::signal peptide and transmembrane prediction
rrub_NCIM00125	4	rrub_460846597,rrub_460848988,rrub_460846168,rrub_460848131	dihydroorotate dehydrogenase family protein::dihydroorotate dehydrogenase 2::dihydroorotate dehydrogenase 2::dihydroorotate dehydrogenase 2
rrub_NCIM00126	4	rrub_460847061,rrub_460847930,rrub_460844904,rrub_460844379	Exopolysaccharide synthesis protein::Exopolysaccharide synthesis protein::capsular exopolysaccharide family::Exopolysaccharide synthesis protein
rrub_NCIM00127	4	rrub_460845003,rrub_460848773,rrub_460846523,rrub_460849365	aldose 1-epimerase::aldose 1-epimerase::Aldose 1-epimerase::aldose 1-epimerase
rrub_NCIM00128	4	rrub_460845429,rrub_460848158,rrub_460844311,rrub_460845540	class II aldolase/adducin family protein::protein containing Class II aldolase/adducin::class II aldolase/adducin family protein::class II aldolase/adducin family protein
rrub_NCIM00129	4	rrub_460847032,rrub_460847921,rrub_460848801,rrub_460848814	polysaccharide biosynthesis protein::polysaccharide biosynthesis protein::polysaccharide biosynthesis protein::polysaccharide biosynthesis protein
rrub_NCIM00130	4	rrub_460848194,rrub_460846285,rrub_460848171,rrub_460847317	glycerate dehydrogenase::D-isomer specific 2-hydroxyacid dehydrogenase, NAD binding domain protein::D-isomer specific 2-hydroxyacid dehydrogenase NAD-binding protein::D-3-phosphoglycerate dehydrogenase
rrub_NCIM00131	4	rrub_460844983,rrub_460845640,rrub_460849177,rrub_460848923	type IV fimbrial assembly protein PilC::type IV pilus biogenesis protein PilC::type II secretion system protein F::general secretion pathway protein F
rrub_NCIM00132	4	rrub_460845422,rrub_460846509,rrub_460844631,rrub_460845918	Biopolymer transport protein ExbD/TolR::Biopolymer transport protein ExbD/TolR::Biopolymer transport protein ExbD/TolR::Biopolymer transport protein ExbD/TolR
rrub_NCIM00133	4	rrub_460845344,rrub_460849342,rrub_460849337,rrub_460849330	hypothetical protein RRSWK_04567::hypothetical protein RRSWK_00504::hypothetical protein RRSWK_00499::hypothetical protein RRSWK_00492
rrub_NCIM00134	4	rrub_460848970,rrub_460845684,rrub_460844946,rrub_460847547	general secretion pathway protein D::bacterial type II/III secretion system protein::general secretion pathway protein D (outD)::type II and III secretion system protein
rrub_NCIM00135	4	rrub_460845028,rrub_460849595,rrub_460848061,rrub_460845030	transglutaminase domain-containing protein::transglutaminase domain-containing protein::transglutaminase domain-containing protein::transglutaminase domain-containing protein
rrub_NCIM00136	4	rrub_460848542,rrub_460847267,rrub_460843065,rrub_460847763	Ribosomal protein S1, RNA binding domain protein::30S ribosomal protein S1::30S ribosomal protein S1::transcriptional accessory protein
rrub_NCIM00137	4	rrub_460848257,rrub_460848390,rrub_460844355,rrub_460843789	Peptidylprolyl isomerase::peptidyl-prolyl cis-trans isomerase cyclophilin type::(CYCLOPHILIN 5) peptidyl-prolyl cis-trans isomerase::peptidylprolyl isomerase
rrub_NCIM00138	4	rrub_460847754,rrub_460849719,rrub_460849775,rrub_460849057	TadE-like protein::TadE-like protein::hypothetical protein RRSWK_00285::TadE-like protein
rrub_NCIM00139	4	rrub_460847560,rrub_460847671,rrub_460842944,rrub_460849215	repeat domain protein::protein containing DUF11::protein containing DUF11::protein containing DUF11, partial
rrub_NCIM00140	3	rrub_460843515,rrub_460845009,rrub_460848076	Putative esterase::gluconolactonase::esterase
rrub_NCIM00141	3	rrub_460844504,rrub_460843162,rrub_460847232	serine/threonine protein phosphatase family protein::serine/threonine protein phosphatase::serine/threonine protein phosphatase
rrub_NCIM00142	3	rrub_460845132,rrub_460843768,rrub_460846779	transcriptional regulator, ArsR family::transcriptional regulator, ArsR family::ArsR family transcriptional regulator
rrub_NCIM00143	3	rrub_460844180,rrub_460843548,rrub_460843547	secreted protein containing DUF1207::hypothetical protein RRSWK_06218::secreted protein containing DUF1207
rrub_NCIM00144	3	rrub_460844226,rrub_460844253,rrub_460844254	flagellar hook protein FlgE::flagellar basal-body rod protein FlgG::flagellar hook-basal body protein, FlgE/F/G
rrub_NCIM00145	3	rrub_460846863,rrub_460842763,rrub_460843326	carbonic anhydrase::sulfate transporter, SulP family protein::sulfate transporter
rrub_NCIM00146	3	rrub_460845979,rrub_460845294,rrub_460846630	aspartate aminotransferase::aspartate aminotransferase::aspartate/tyrosine/aromatic aminotransferase
rrub_NCIM00147	3	rrub_460845124,rrub_460849199,rrub_460849200	O-acetylhomoserine/O-acetylserine sulfhydrylase::methionine gamma-lyase::Cystathionine beta-lyase
rrub_NCIM00148	3	rrub_460843340,rrub_460845900,rrub_460848499	metallo-beta-lactamase/rhodanese-like domain-containing protein::metallo-beta-lactamase/rhodanese-like domain-containing protein::Rhodanese domain protein
rrub_NCIM00149	3	rrub_460848024,rrub_460846822,rrub_460847712	oxaloacetate decarboxylase subunit alpha::Pyruvate carboxylase::acetyl-CoA carboxylase biotin carboxylase subunit
rrub_NCIM00150	3	rrub_460849785,rrub_460842905,rrub_460846975	replicative DNA helicase::replicative DNA helicase::replicative DNA helicase
rrub_NCIM00151	3	rrub_460845834,rrub_460845838,rrub_460845839	integrase family protein::integrase/recombinase XerD::integrase family protein
rrub_NCIM00152	3	rrub_460845798,rrub_460844880,rrub_460846423	putative secreted protein::hypothetical protein RRSWK_05080::putative secreted protein
rrub_NCIM00153	3	rrub_460847531,rrub_460846405,rrub_460849514	putative secreted protein::hypothetical protein RRSWK_03568::protein containing DUF1680
rrub_NCIM00154	3	rrub_460846931,rrub_460843171,rrub_460848405	protein containing DUF1571::secreted protein containing DUF1571::secreted protein containing DUF1571
rrub_NCIM00155	3	rrub_460845325,rrub_460848041,rrub_460848050	glycosyl transferase family protein::glycosyl transferase family protein::glycosyl transferase family protein
rrub_NCIM00156	3	rrub_460847613,rrub_460848439,rrub_460847012	hypothetical protein RRSWK_02351::hypothetical protein RRSWK_01573::hypothetical protein RRSWK_02621
rrub_NCIM00157	3	rrub_460846819,rrub_460849154,rrub_460844369	Adenylyl cyclase class-3/4/guanylyl cyclase domain protein::adenylate/guanylate cyclase::adenylate/guanylate cyclase
rrub_NCIM00158	3	rrub_460845770,rrub_460848123,rrub_460844349	protein disulfide-isomerase::YHS domain protein::protein disulfide-isomerase
rrub_NCIM00159	3	rrub_460843289,rrub_460843830,rrub_460849194	lipopolysaccharide biosynthesis protein::exopolysaccharide biosynthesis protein::lipopolysaccharide biosynthesis protein
rrub_NCIM00160	3	rrub_460847474,rrub_460844042,rrub_460849688	UDP-glucose 6-dehydrogenase::UDP-glucose/GDP-mannose dehydrogenase::UDP-glucose/GDP-mannose dehydrogenase
rrub_NCIM00161	3	rrub_460846076,rrub_460843198,rrub_460847396	outer membrane efflux protein::Outer membrane efflux protein::Outer membrane efflux protein
rrub_NCIM00162	3	rrub_460847800,rrub_460845896,rrub_460843594	Lipase, GDSL domain protein::O-antigen related protein::O-antigen related protein
rrub_NCIM00163	3	rrub_460847235,rrub_460845135,rrub_460847734	signal peptide protein::signal peptide protein::ferredoxin
rrub_NCIM00164	3	rrub_460843244,rrub_460849302,rrub_460843103	protein containing DUF1568::protein containing DUF1568::protein containing DUF1568
rrub_NCIM00165	3	rrub_460847158,rrub_460848127,rrub_460848587	ABC1 family protein::ubiquinone biosynthesis protein UbiB::ubiquinone biosynthesis protein UbiB
rrub_NCIM00166	3	rrub_460849703,rrub_460844598,rrub_460848339	excinuclease ABC subunit A::excinuclease ABC, A subunit::excinuclease ABC, A subunit
rrub_NCIM00167	3	rrub_460849270,rrub_460845241,rrub_460849963	rhamnose-proton symporter::RhaT l-rhamnose-proton symport 2::RhaT l-rhamnose-proton symport 2
rrub_NCIM00168	3	rrub_460845006,rrub_460845443,rrub_460844811	Glutamate--tRNA ligase::glutamyl-tRNA synthetase::glutaminyl-tRNA synthetase
rrub_NCIM00169	3	rrub_460846808,rrub_460846807,rrub_460846804	putative secreted protein::hypothetical protein RRSWK_03154::putative secreted protein
rrub_NCIM00170	3	rrub_460847677,rrub_460846403,rrub_460848121	hypothetical protein RRSWK_02201::Glycosyl transferase, family 2::glycosyl transferase family protein
rrub_NCIM00171	3	rrub_460844382,rrub_460844126,rrub_460843247	hypothetical protein RRSWK_05507::hypothetical protein RRSWK_05770::hypothetical protein RRSWK_06621
rrub_NCIM00172	3	rrub_460842705,rrub_460842704,rrub_460847541	zinc protease::processing peptidase::peptidase M16 domain-containing protein
rrub_NCIM00173	3	rrub_460843145,rrub_460847880,rrub_460846802	cyclic nucleotide-binding protein::molybdopterin oxidoreductase, iron sulfur subunit::cyclic nucleotide-binding domain (cNMP-BD) protein
rrub_NCIM00174	3	rrub_460844894,rrub_460844077,rrub_460844883	Integrase, catalytic core, phage domain protein::Integrase, catalytic core, phage domain protein::hypothetical protein RRSWK_05083
rrub_NCIM00175	3	rrub_460843235,rrub_460848618,rrub_460848628	integron integrase, partial::integron integrase, partial::integrase/recombinase Y4QK
rrub_NCIM00176	3	rrub_460846433,rrub_460846431,rrub_460845171	chaperonin GroEL::chaperonin GroEL::chaperonin GroEL
rrub_NCIM00177	3	rrub_460846933,rrub_460842712,rrub_460846194	putative secreted protein::putative secreted protein::hypothetical protein RRSWK_03605
rrub_NCIM00178	3	rrub_460847751,rrub_460845757,rrub_460842998	DNA topoisomerase IV, B subunit::DNA gyrase, B subunit::DNA gyrase subunit B
rrub_NCIM00179	3	rrub_460847611,rrub_460845078,rrub_460848862	Inositol monophosphatase::inositol monophosphatase family protein::inositol-1-monophosphatase
rrub_NCIM00180	3	rrub_460849273,rrub_460842812,rrub_460849153	ribokinase-like domain-containing protein::ribokinase-like domain-containing protein::ribokinase-like domain-containing protein
rrub_NCIM00181	3	rrub_460849262,rrub_460846249,rrub_460849261	Monosaccharide-transporting ATPase::monosaccharide-transporting ATPase::monosaccharide-transporting ATPase
rrub_NCIM00182	3	rrub_460844381,rrub_460848572,rrub_460842644	hypothetical protein RRSWK_05506::lipoprotein::hypothetical protein RRSWK_07239
rrub_NCIM00183	3	rrub_460847700,rrub_460842881,rrub_460843669	hypothetical protein RRSWK_02224::hypothetical protein RRSWK_06919::hypothetical protein RRSWK_06339
rrub_NCIM00184	3	rrub_460844445,rrub_460845474,rrub_460843816	preprotein translocase subunit SecA::preprotein translocase secA subunit::preprotein translocase, SecA subunit
rrub_NCIM00185	3	rrub_460849834,rrub_460848288,rrub_460845314	peptidyl-prolyl cis-trans isomerase, FKBP-type::FKBP-type peptidyl-prolyl cis-trans isomerase fkpA::FKBP-type peptidyl-prolyl cis-trans isomerase
rrub_NCIM00186	3	rrub_460846322,rrub_460849767,rrub_460845535	L-fucose:H+ symporter permease::glucose/galactose transporter family protein::L-fucose:H+ symporter permease
rrub_NCIM00187	3	rrub_460848249,rrub_460843468,rrub_460843673	peptidase S9, prolyl oligopeptidase active site domain protein::peptidase S9B dipeptidylpeptidase IV domain protein::peptidase S9B dipeptidylpeptidase IV domain protein
rrub_NCIM00188	3	rrub_460844169,rrub_460849491,rrub_460846563	Na(+)-translocating NADH-quinone reductase subunit F::oxidoreductase FAD/NAD(P)-binding domain protein::oxidoreductase FAD/NAD(P)-binding domain protein
rrub_NCIM00189	3	rrub_460848697,rrub_460846140,rrub_460848847	heat-shock chaperone protein::molecular chaperone-like protein::molecular chaperone DnaK
rrub_NCIM00190	3	rrub_460846923,rrub_460848157,rrub_460844156	Glycerol kinase::L-ribulokinase::xylulose kinase
rrub_NCIM00191	3	rrub_460844902,rrub_460846183,rrub_460849687	signal peptide protein::O-antigen ligase-related protein::signal peptide protein
rrub_NCIM00192	3	rrub_460845870,rrub_460849976,rrub_460848064	hypothetical protein RRSWK_03964::hypothetical protein RRSWK_00095::hypothetical protein RRSWK_01999
rrub_NCIM00193	3	rrub_460843605,rrub_460847739,rrub_460847784	peptidase domain-containing protein::peptidase domain protein::serine proteinase, subtilase family
rrub_NCIM00194	3	rrub_460849598,rrub_460849327,rrub_460844564	CsbD-like protein::CsbD-like protein::CsbD-like protein
rrub_NCIM00195	3	rrub_460845155,rrub_460845154,rrub_460845898	metallophosphoesterase::metallophosphoesterase::metallophosphoesterase
rrub_NCIM00196	3	rrub_460844778,rrub_460843000,rrub_460849446	PfpI family intracellular peptidase::intracellular protease, PfpI family::intracellular protease, PfpI family
rrub_NCIM00197	3	rrub_460845367,rrub_460845366,rrub_460848130	heat shock protein Hsp20::heat shock protein Hsp20::heat shock protein Hsp20
rrub_NCIM00198	3	rrub_460847558,rrub_460849842,rrub_460843685	leucine-rich repeat domain protein::regulatory subunit::hypothetical protein RRSWK_06355
rrub_NCIM00199	3	rrub_460849837,rrub_460845001,rrub_460843119	RNA polymerase sigma-70 ECF-like protein::RNA polymerase sigma-70 ECF-like protein::ECF subfamily RNA polymerase sigma-24 factor
rrub_NCIM00200	3	rrub_460846014,rrub_460845385,rrub_460848086	hypothetical protein RRSWK_03922::transmembrane::putative secreted protein
rrub_NCIM00201	3	rrub_460843906,rrub_460843667,rrub_460843666	Biopolymer transport protein ExbD/TolR::biopolymer transport exbD2 protein::Biopolymer transport protein ExbD/TolR
rrub_NCIM00202	3	rrub_460848612,rrub_460847967,rrub_460846047	hypothetical protein RRSWK_01389::hypothetical protein RRSWK_01902::hypothetical protein RRSWK_03773
rrub_NCIM00203	3	rrub_460847706,rrub_460848295,rrub_460849747	Polyprenyl synthetase::Polyprenyl synthetase::polyprenyl synthetase
rrub_NCIM00204	3	rrub_460846258,rrub_460848879,rrub_460845543	protein containing DUF1570::protein containing DUF1570::secreted protein containing DUF1570
rrub_NCIM00205	3	rrub_460844982,rrub_460844040,rrub_460844045	S23 ribosomal protein::23S rRNA-associated protein::S23 ribosomal protein
rrub_NCIM00206	3	rrub_460849894,rrub_460845087,rrub_460843321	DNA repair protein RadC::DNA repair protein RadC::DNA repair protein RadC
rrub_NCIM00207	3	rrub_460846831,rrub_460846830,rrub_460849214	flagellin::flagellin::flagellin domain protein
rrub_NCIM00208	3	rrub_460847512,rrub_460843005,rrub_460846943	4Fe-4S ferredoxin iron-sulfur binding domain protein::Ferredoxin 1::4Fe-4S ferredoxin iron-sulfur binding domain protein
rrub_NCIM00209	3	rrub_460848475,rrub_460849816,rrub_460847004	secreted protein containing DUF1598::protein containing DUF1598::secreted protein containing DUF1598
rrub_NCIM00210	3	rrub_460847854,rrub_460847050,rrub_460844929	ABC transporter, permease protein::ABC-2 type transporter::ABC-2 type transporter
rrub_NCIM00211	3	rrub_460845019,rrub_460846505,rrub_460844364	LmbE family protein::N-acetylglucosaminyl phosphatidylinositol deacetylase::LmbE family protein
rrub_NCIM00212	3	rrub_460846122,rrub_460849275,rrub_460849968	Beta-agarase::beta-agarase::Beta-agarase
rrub_NCIM00213	3	rrub_460843646,rrub_460847945,rrub_460847442	Polyphosphate kinase 2, predicted::Polyphosphate kinase 2, predicted::polyphosphate kinase 2
rrub_NCIM00214	3	rrub_460844795,rrub_460847092,rrub_460846302	membrane protein containing Transglutaminase-like domain protein::transglutaminase domain protein::transglutaminase domain protein
rrub_NCIM00215	3	rrub_460849586,rrub_460843678,rrub_460843962	Pyridoxal-5'-phosphate-dependent protein beta subunit::cysteine synthase A::cysteine synthase A
rrub_NCIM00216	3	rrub_460848232,rrub_460842817,rrub_460843881	xylose/H+ symporter::MFS transporter, sugar porter family::Sugar/inositol transporter
rrub_NCIM00217	3	rrub_460842801,rrub_460844867,rrub_460842759	Phosphate-selective porin O/P::polyphosphate-selective porin O::Phosphate-selective porin O/P
rrub_NCIM00218	3	rrub_460848598,rrub_460847344,rrub_460846236	resolvase domain-containing protein::resolvase domain-containing protein::site-specific recombinase, resolvase family protein
rrub_NCIM00219	3	rrub_460849218,rrub_460844107,rrub_460845194	protein containing DUF1568::hypothetical protein RRSWK_05807::protein containing DUF1568
rrub_NCIM00220	3	rrub_460846692,rrub_460845926,rrub_460845733	glycoside hydrolase family::glycoside hydrolase family 28::glycoside hydrolase family 28
rrub_NCIM00221	3	rrub_460847427,rrub_460843733,rrub_460847378	Secretion protein HlyD::metal transport-related, exported protein::metal transport-related, exported protein
rrub_NCIM00222	3	rrub_460842808,rrub_460849266,rrub_460842726	mandelate racemase/muconate lactonizing enzyme family protein::Mandelate racemase/muconate lactonizing protein::mandelate racemase/muconate lactonizing enzyme family protein
rrub_NCIM00223	3	rrub_460842695,rrub_460848422,rrub_460848383	sodium/hydrogen exchanger::PTS IIA-like nitrogen-regulatory protein PtsN::PTS system, fructose-specific IIABC component
rrub_NCIM00224	3	rrub_460849314,rrub_460843943,rrub_460847973	membrane protein containing DUF1328::secreted protein containing DUF1328::membrane protein containing DUF1328
rrub_NCIM00225	3	rrub_460844829,rrub_460848732,rrub_460843653	Peptidase S54, rhomboid::Peptidase S54, rhomboid::Peptidase S54, rhomboid
rrub_NCIM00226	3	rrub_460842833,rrub_460849543,rrub_460847028	DevC protein::DevC protein::ABC transporter permease protein
rrub_NCIM00227	3	rrub_460846504,rrub_460842659,rrub_460848468	glucosamine-6-phosphate deaminase::glucosamine-6-phosphate isomerase::glucosamine-6-phosphate deaminase
rrub_NCIM00228	3	rrub_460848694,rrub_460845636,rrub_460843841	Peptidase S41A::carboxyl-terminal protease::tail-specific protease precursor
rrub_NCIM00229	3	rrub_460849526,rrub_460844009,rrub_460845232	alpha amylase catalytic region::alpha-amylase, amylosucrase::glycosidase
rrub_NCIM00230	2	rrub_460845029,rrub_460845026	protein containing DUF404, bacteria::hypothetical protein RRSWK_04802
rrub_NCIM00231	2	rrub_460847882,rrub_460849211	precorrin-3B synthase::sulfite reductase subunit beta
rrub_NCIM00232	2	rrub_460846847,rrub_460848427	magnesium transporter::magnesium transporter
rrub_NCIM00233	2	rrub_460844686,rrub_460845038	glycerophosphoryl diester phosphodiesterase family protein::glycerophosphoryl diester phosphodiesterase
rrub_NCIM00234	2	rrub_460843438,rrub_460842673	hypothetical protein RRSWK_06451::YTV domain protein
rrub_NCIM00235	2	rrub_460848470,rrub_460844555	alpha-isopropylmalate/homocitrate synthase family transferase::2-isopropylmalate synthase
rrub_NCIM00236	2	rrub_460842747,rrub_460849291	3-demethylubiquinone-9 3-methyltransferase::DGPFAETKE family protein
rrub_NCIM00237	2	rrub_460847336,rrub_460844712	hypothetical protein RRSWK_02611::hypothetical protein RRSWK_05144
rrub_NCIM00238	2	rrub_460844651,rrub_460845584	hypothetical protein RRSWK_05241::hypothetical protein RRSWK_04127
rrub_NCIM00239	2	rrub_460843350,rrub_460848254	3-dehydroquinate synthase::3-dehydroquinate synthase
rrub_NCIM00240	2	rrub_460847413,rrub_460844289	secreted protein::signal peptide protein
rrub_NCIM00241	2	rrub_460848990,rrub_460849480	putative secreted protein::putative secreted protein
rrub_NCIM00242	2	rrub_460846100,rrub_460844671	hypothetical protein RRSWK_03826::hypothetical protein RRSWK_05261
rrub_NCIM00243	2	rrub_460845355,rrub_460846559	MATE efflux family protein::MATE efflux family protein
rrub_NCIM00244	2	rrub_460844175,rrub_460847781	amidohydrolase 2::amidohydrolase 2
rrub_NCIM00245	2	rrub_460848677,rrub_460845439	hypothetical protein RRSWK_01250::hypothetical protein RRSWK_04516
rrub_NCIM00246	2	rrub_460845343,rrub_460845137	Endonuclease/exonuclease/phosphatase::membrane protein containing Endonuclease/exonuclease/phosphatase domain protein
rrub_NCIM00247	2	rrub_460846689,rrub_460848284	ATP-dependent DNA helicase RecG::transcription-repair coupling factor
rrub_NCIM00248	2	rrub_460843635,rrub_460845349	ribosomal RNA adenine dimethylase phospholipid N-methyltransferase::Methyltransferase type 12
rrub_NCIM00249	2	rrub_460848198,rrub_460848900	tRNA-dihydrouridine synthase::TIM-barrel protein, nifR3 family
rrub_NCIM00250	2	rrub_460846339,rrub_460847689	sugar-phosphate isomerase, RpiB/LacA/LacB family::ribose-5-phosphate isomerase B
rrub_NCIM00251	2	rrub_460846067,rrub_460849578	Gluconate transporter::Gluconate transporter
rrub_NCIM00252	2	rrub_460845758,rrub_460848315	DNA gyrase, subunit A::DNA gyrase, A subunit
rrub_NCIM00253	2	rrub_460845372,rrub_460846429	GrpE nucleotide exchange factor::GrpE nucleotide exchange factor
rrub_NCIM00254	2	rrub_460844195,rrub_460848843	putative secreted protein::putative secreted protein
rrub_NCIM00255	2	rrub_460846432,rrub_460845170	10 kDa chaperonin::Chaperonin Cpn10
rrub_NCIM00256	2	rrub_460843342,rrub_460845131	Rhodanese domain protein::rhodanese domain-containing protein
rrub_NCIM00257	2	rrub_460843347,rrub_460846412	multifunctional fatty acid oxidation complex subunit alpha::multifunctional fatty acid oxidation complex subunit alpha
rrub_NCIM00258	2	rrub_460849231,rrub_460845989	membrane protein containing DUF900, hydrolase-like protein::putative hydrolase family protein
rrub_NCIM00259	2	rrub_460845809,rrub_460843473	von Willebrand factor type A domain protein::von Willebrand factor type A domain-containing protein
rrub_NCIM00260	2	rrub_460849521,rrub_460848487	F0F1 ATP synthase subunit A::ATPase, F0 complex, subunit A
rrub_NCIM00261	2	rrub_460844517,rrub_460847881	oxidoreductase alpha (molybdopterin) subunit::nitrate reductase catalytic subunit
rrub_NCIM00262	2	rrub_460848032,rrub_460848031	hypothetical protein RRSWK_01967::hypothetical protein RRSWK_01966
rrub_NCIM00263	2	rrub_460847081,rrub_460844491	beta-galactosidase::beta-galactosidase
rrub_NCIM00264	2	rrub_460843400,rrub_460844861	Xylose isomerase domain protein TIM barrel::xylose isomerase domain-containing protein
rrub_NCIM00265	2	rrub_460843640,rrub_460843418	peptide methionine sulfoxide reductase::peptide methionine sulfoxide reductase
rrub_NCIM00266	2	rrub_460846200,rrub_460845583	hypothetical protein RRSWK_03611::secreted protein
rrub_NCIM00267	2	rrub_460847424,rrub_460843736	Outer membrane efflux protein::Outer membrane efflux protein
rrub_NCIM00268	2	rrub_460849533,rrub_460844853	hypothetical protein RRSWK_00695::secreted protein
rrub_NCIM00269	2	rrub_460849794,rrub_460846569	hypothetical protein RRSWK_00304::hypothetical protein RRSWK_03316
rrub_NCIM00270	2	rrub_460849791,rrub_460847241	Secretion chaperone CsaA::chaperonin involved in protein secretion (CsaA protein)
rrub_NCIM00271	2	rrub_460844879,rrub_460848058	secreted protein::secreted protein
rrub_NCIM00272	2	rrub_460845871,rrub_460849243	alpha-glucan phosphorylase::glycogen/starch/alpha-glucan phosphorylase
rrub_NCIM00273	2	rrub_460845744,rrub_460845746	secreted protein::putative secreted protein
rrub_NCIM00274	2	rrub_460845161,rrub_460846398	zinc carboxypeptidase family protein::peptidase M14 carboxypeptidase A
rrub_NCIM00275	2	rrub_460848959,rrub_460846226	transposase mutator::transposase, Mutator family
rrub_NCIM00276	2	rrub_460847522,rrub_460843458	signal peptide protein::signal peptide protein
rrub_NCIM00277	2	rrub_460846649,rrub_460842841	UMP-CMP kinase::adenylate kinase
rrub_NCIM00278	2	rrub_460848534,rrub_460844444	efflux transporter, RND family, MFP subunit::secretion protein HlyD family protein
rrub_NCIM00279	2	rrub_460847744,rrub_460844027	glutamate synthase subunit beta::glutamate synthase small subunit
rrub_NCIM00280	2	rrub_460848089,rrub_460848082	rhamnogalacturonan acetylesterase::rhamnogalacturonan acetylesterase
rrub_NCIM00281	2	rrub_460843161,rrub_460843844	signal peptide protein::secreted protein containing DUF1573
rrub_NCIM00282	2	rrub_460843440,rrub_460846276	hemolysin::hemolysin protein
rrub_NCIM00283	2	rrub_460848332,rrub_460843196	integral membrane protein::Nodulin 21-like protein
rrub_NCIM00284	2	rrub_460842903,rrub_460846973	hypothetical protein RRSWK_06941::hypothetical protein RRSWK_03021
rrub_NCIM00285	2	rrub_460849112,rrub_460849113	hypothetical protein RRSWK_00861::hypothetical protein RRSWK_00862
rrub_NCIM00286	2	rrub_460844774,rrub_460844773	Peptidase S14, ClpP::ATP-dependent Clp protease, proteolytic subunit ClpP
rrub_NCIM00287	2	rrub_460842767,rrub_460845095	3-deoxy-8-phosphooctulonate synthase::3-deoxy-7-phosphoheptulonate synthase
rrub_NCIM00288	2	rrub_460849460,rrub_460844138	nonspecific acid phosphatase precursor::nonspecific acid phosphatase precursor
rrub_NCIM00289	2	rrub_460843757,rrub_460848748	aspartate carbamoyltransferase, catalytic subunit::aspartate carbamoyltransferase catalytic subunit
rrub_NCIM00290	2	rrub_460846465,rrub_460847341	stationary-phase survival protein SurE::stationary phase survival protein SurE
rrub_NCIM00291	2	rrub_460846662,rrub_460848936	TonB-dependent copper receptor::TonB-dependent copper receptor
rrub_NCIM00292	2	rrub_460847449,rrub_460847876	binding-protein-dependent transport system inner membrane component::nitrate ABC transporter permease protein
rrub_NCIM00293	2	rrub_460845007,rrub_460847742	hydrogen peroxide-inducible gene activator::transcriptional regulator, LysR family
rrub_NCIM00294	2	rrub_460843170,rrub_460848928	DNA polymerase III alpha subunit::DNA polymerase III, alpha subunit
rrub_NCIM00295	2	rrub_460844950,rrub_460846475	radical SAM enzyme, Cfr family::radical SAM enzyme, Cfr family
rrub_NCIM00296	2	rrub_460848088,rrub_460848154	endo-1,4-beta-xylanase::endo-1,4-beta-xylanase
rrub_NCIM00297	2	rrub_460845617,rrub_460843466	UbiE/COQ5 methyltransferase::ubiquinone/menaquinone biosynthesis methyltransferase UbiE
rrub_NCIM00298	2	rrub_460846901,rrub_460842933	polysaccharide export protein::polysaccharide biosynthesis/export protein
rrub_NCIM00299	2	rrub_460849245,rrub_460844070	hypothetical protein RRSWK_00407::transposase, mutator type
rrub_NCIM00300	2	rrub_460844526,rrub_460848540	Putative oxygen-independent coproporphyrinogen III oxidase::oxygen-independent coproporphyrinogen III oxidase
rrub_NCIM00301	2	rrub_460846878,rrub_460848680	PbrT protein-putative c-type cytochrome::PbrT protein-putative c-type cytochrome
rrub_NCIM00302	2	rrub_460844428,rrub_460844666	Glucosylceramidase domain protein::Glucosylceramidase domain protein
rrub_NCIM00303	2	rrub_460844328,rrub_460843035	4-hydroxybenzoyl-CoA thioesterase::thioesterase superfamily protein
rrub_NCIM00304	2	rrub_460849117,rrub_460849861	transposase::transposase
rrub_NCIM00305	2	rrub_460842806,rrub_460842807	GntR domain-containing protein::GntR family transcriptional regulator
rrub_NCIM00306	2	rrub_460842800,rrub_460846361	Peptide chain release factor 2::peptide chain release factor 1
rrub_NCIM00307	2	rrub_460844181,rrub_460843571	hypothetical protein RRSWK_05597::hypothetical protein RRSWK_06241
rrub_NCIM00308	2	rrub_460842717,rrub_460844900	5-nucleotidase lipoprotein e(P4)::5-nucleotidase lipoprotein e(P4)
rrub_NCIM00309	2	rrub_460848886,rrub_460844576	putative secreted protein::putative membrane protein
rrub_NCIM00310	2	rrub_460843761,rrub_460849749	integral membrane protein::putative membrane protein
rrub_NCIM00311	2	rrub_460848471,rrub_460847297	valyl-tRNA synthetase::Isoleucyl-tRNA synthetase 2
rrub_NCIM00312	2	rrub_460848957,rrub_460847007	RNA 2-phosphotransferase::phosphate acetyltransferase
rrub_NCIM00313	2	rrub_460848951,rrub_460848950	fibrinogen-binding protein::fibrinogen-binding protein
rrub_NCIM00314	2	rrub_460849264,rrub_460847177	periplasmic binding protein/LacI transcriptional regulator::periplasmic binding protein/LacI transcriptional regulator
rrub_NCIM00315	2	rrub_460846015,rrub_460849683	alpha-L-glutamate ligase, RimK family::ribosomal protein S6 modification protein
rrub_NCIM00316	2	rrub_460843384,rrub_460843946	phospholipase D/Transphosphatidylase::cardiolipin synthetase
rrub_NCIM00317	2	rrub_460843385,rrub_460847414	signal peptide protein::hypothetical protein RRSWK_02595
rrub_NCIM00318	2	rrub_460846146,rrub_460847873	nucleoside diphosphate kinase regulator::transcription elongation factor greA
rrub_NCIM00319	2	rrub_460847618,rrub_460846708	acetolactate synthase, large subunit, biosynthetic type::acetolactate synthase, large subunit, biosynthetic type
rrub_NCIM00320	2	rrub_460845100,rrub_460844088	hypothetical protein RRSWK_04876::GCN5-related N-acetyltransferase domain protein
rrub_NCIM00321	2	rrub_460849289,rrub_460849292	putative thioredoxin family protein::YCII-related protein
rrub_NCIM00322	2	rrub_460846817,rrub_460847839	hypothetical protein RRSWK_03164::secreted protein
rrub_NCIM00323	2	rrub_460849120,rrub_460849122	Transposase, IS4 family protein::transposase IS4 family
rrub_NCIM00324	2	rrub_460842810,rrub_460849272	KDPG and KHG aldolase::2-dehydro-3-deoxyphosphogluconate aldolase/4- hydroxy-2-oxoglutarate aldolase
rrub_NCIM00325	2	rrub_460842760,rrub_460847515	hypothetical protein RRSWK_07102::hypothetical protein RRSWK_02476
rrub_NCIM00326	2	rrub_460844231,rrub_460842706	SSU ribosomal protein S12P methylthiotransferase::tRNA-I(6)A37 thiotransferase enzyme MiaB
rrub_NCIM00327	2	rrub_460848436,rrub_460846959	sodium extrusion ABC transporter,permease protein::sodium extrusion protein NatB
rrub_NCIM00328	2	rrub_460848547,rrub_460846401	signal peptide protein::signal peptide protein
rrub_NCIM00329	2	rrub_460842638,rrub_460844034	hypothetical protein RRSWK_07233::hypothetical protein RRSWK_05856
rrub_NCIM00330	2	rrub_460845383,rrub_460848942	Xylose isomerase domain protein TIM barrel::Xylose isomerase domain protein TIM barrel
rrub_NCIM00331	2	rrub_460843395,rrub_460845236	phosphoribosylformimino-5-aminoimidazole carboxamide ribotide isomerase::imidazoleglycerol phosphate synthase, cyclase subunit
rrub_NCIM00332	2	rrub_460843394,rrub_460849484	TrkA-N domain protein::TrkA-N domain protein
rrub_NCIM00333	2	rrub_460844575,rrub_460847148	signal peptide protein::hypothetical protein RRSWK_02757
rrub_NCIM00334	2	rrub_460845016,rrub_460846736	3-isopropylmalate dehydratase, large subunit::aconitate hydratase 1
rrub_NCIM00335	2	rrub_460849600,rrub_460849602	glycosidase::glycosidase
rrub_NCIM00336	2	rrub_460844095,rrub_460843924	hypothetical protein RRSWK_05795::hypothetical protein RRSWK_05948
rrub_NCIM00337	2	rrub_460845972,rrub_460849732	ATP-dependent helicase HrpB::ATP-dependent RNA helicase HrpA
rrub_NCIM00338	2	rrub_460843287,rrub_460845705	putative secreted protein::secreted protein
rrub_NCIM00339	2	rrub_460847472,rrub_460844658	glycoside hydrolase family protein::glycoside hydrolase family 10
rrub_NCIM00340	2	rrub_460845437,rrub_460842955	hypothetical protein RRSWK_04514::hypothetical protein RRSWK_06993
rrub_NCIM00341	2	rrub_460842825,rrub_460843017	protein containing DUF1597::secreted protein containing DUF1597
rrub_NCIM00342	2	rrub_460848599,rrub_460846235	bacteriophage related protein::bacteriophage related protein
rrub_NCIM00343	2	rrub_460848979,rrub_460849529	hypothetical protein RRSWK_00971::hypothetical protein RRSWK_00691
rrub_NCIM00344	2	rrub_460845613,rrub_460847704	radical SAM domain-containing protein::radical SAM domain-containing protein
rrub_NCIM00345	2	rrub_460847542,rrub_460843253	Rieske::Rieske (2Fe-2S) domain protein
rrub_NCIM00346	2	rrub_460843122,rrub_460843133	signal peptide protein::signal peptide protein
rrub_NCIM00347	2	rrub_460848725,rrub_460846293	mannose-6-phosphate isomerase, class I::phosphomannose isomerase-like protein
rrub_NCIM00348	2	rrub_460849459,rrub_460849143	putative secreted protein::hypothetical protein RRSWK_00782
rrub_NCIM00349	2	rrub_460844302,rrub_460845572	signal peptide protein::signal peptide protein
rrub_NCIM00350	2	rrub_460847923,rrub_460843306	radical SAM family protein::radical SAM domain-containing protein
rrub_NCIM00351	2	rrub_460844854,rrub_460843231	lipoprotein::phospholipid-binding protein
rrub_NCIM00352	2	rrub_460845920,rrub_460846346	Methyltransferase type 11::Methyltransferase type 11
rrub_NCIM00353	2	rrub_460848898,rrub_460849706	serine/threonine protein phosphatase::serine/threonine phosphatase
rrub_NCIM00354	2	rrub_460845399,rrub_460845398	hypothetical protein RRSWK_04476::hypothetical protein RRSWK_04475
rrub_NCIM00355	2	rrub_460845427,rrub_460844964	3-isopropylmalate dehydrogenase::3-isopropylmalate dehydrogenase
rrub_NCIM00356	2	rrub_460844281,rrub_460845538	Rhamnulokinase (Rhamnulose kinase)::Rhamnulokinase
rrub_NCIM00357	2	rrub_460846644,rrub_460843588	putative secreted protein::hypothetical protein RRSWK_06258
rrub_NCIM00358	2	rrub_460846977,rrub_460846978	ankyrin repeat domain-containing SOCS box protein::ankyrin repeat-containing protein
rrub_NCIM00359	2	rrub_460845688,rrub_460845517	Flp/Fap pilin component::Flp/Fap pilin component
rrub_NCIM00360	2	rrub_460848382,rrub_460848840	hypothetical protein RRSWK_01516::hypothetical protein RRSWK_01091
rrub_NCIM00361	2	rrub_460847481,rrub_460843078	DNA binding domain protein, excisionase family::binding domain protein, excisionase family
rrub_NCIM00362	2	rrub_460846621,rrub_460846976	hypothetical protein RRSWK_03368::hypothetical protein RRSWK_03024
rrub_NCIM00363	2	rrub_460844191,rrub_460846624	integral membrane sensor signal transduction histidine kinase::GGDEF family protein
rrub_NCIM00364	2	rrub_460848967,rrub_460842897	purine nucleoside phosphorylase I, inosine and guanosine-specific::Inosine guanosine and xanthosine phosphorylase
rrub_NCIM00365	2	rrub_460846682,rrub_460843001	hypothetical protein RRSWK_03300::hypothetical protein RRSWK_07039
rrub_NCIM00366	2	rrub_460843641,rrub_460848784	SMP-30/Gluconolaconase/LRE domain protein::gluconolactonase
rrub_NCIM00367	2	rrub_460847392,rrub_460847918	sterol desaturase-related protein::fatty acid hydroxylase
rrub_NCIM00368	2	rrub_460845386,rrub_460846531	putative membrane protein::putative membrane protein
rrub_NCIM00369	2	rrub_460844069,rrub_460847936	glycosyl transferase, group 2 family protein::glycosyl transferase, group 2 family protein
rrub_NCIM00370	2	rrub_460847932,rrub_460844943	hypothetical protein RRSWK_01867::hypothetical protein RRSWK_05143
rrub_NCIM00371	2	rrub_460849271,rrub_460846521	GntR family transcriptional regulator::GntR family transcriptional regulator
rrub_NCIM00372	2	rrub_460849109,rrub_460849114	hypothetical protein RRSWK_00858::hypothetical protein RRSWK_00863
rrub_NCIM00373	2	rrub_460845864,rrub_460848008	secreted protein::secreted protein
rrub_NCIM00374	2	rrub_460845642,rrub_460843315	NolW domain protein::NolW domain protein
rrub_NCIM00375	2	rrub_460843958,rrub_460849163	hypothetical protein RRSWK_05982::putative membrane protein
rrub_NCIM00376	2	rrub_460849718,rrub_460845518	putative membrane protein::putative membrane protein
rrub_NCIM00377	2	rrub_460848854,rrub_460848060	NADH:flavin oxidoreductase/NADH oxidase::xenobiotic reductase A
rrub_NCIM00378	2	rrub_460849628,rrub_460847146	hypothetical protein RRSWK_00138::hypothetical protein RRSWK_02755
rrub_NCIM00379	2	rrub_460844905,rrub_460844376	Tetratricopeptide TPR_2 repeat protein::hypothetical protein RRSWK_05537
rrub_NCIM00380	2	rrub_460844907,rrub_460844377	membrane protein containing Exosortase, EpsH, 8 transmembrane domain protein::membrane protein containing Exosortase, EpsH, 8 transmembrane domain protein
rrub_NCIM00381	2	rrub_460844054,rrub_460843691	hypothetical protein RRSWK_05831::transposase, IS4
rrub_NCIM00382	2	rrub_460845505,rrub_460845712	hypothetical protein RRSWK_04387::secreted protein
rrub_NCIM00383	2	rrub_460846949,rrub_460844617	Phytanoyl-CoA dioxygenase::Phytanoyl-CoA dioxygenase
rrub_NCIM00384	2	rrub_460844901,rrub_460842996	SD repeat-containing protein::SD repeat-containing protein
rrub_NCIM00385	2	rrub_460848975,rrub_460849562	Sodium/hydrogen exchanger::Sodium/hydrogen exchanger
rrub_NCIM00386	2	rrub_460848196,rrub_460848657	signal peptide prediction::signal peptide prediction
rrub_NCIM00387	2	rrub_460847124,rrub_460847125	methylmalonyl-CoA mutase large subunit::methylmalonyl-CoA mutase, large subunit
rrub_NCIM00388	2	rrub_460848354,rrub_460848582	multidrug resistance efflux pump::protein secretion protein, HlyD family
rrub_NCIM00389	2	rrub_460843729,rrub_460843200	hypothetical protein RRSWK_06139::hypothetical protein RRSWK_06647
rrub_NCIM00390	2	rrub_283465008,rrub_460845237	bifunctional purine biosynthesis protein::AICARFT/IMPCHase bienzyme
rrub_NCIM00391	2	rrub_460848597,rrub_460846237	hypothetical protein RRSWK_01374::hypothetical protein RRSWK_03648
rrub_NCIM00392	2	rrub_460848593,rrub_460848349	Carbohydrate-selective porin OprB::Carbohydrate-selective porin OprB
rrub_NCIM00393	2	rrub_460848853,rrub_460849644	protoporphyrinogen oxidase::protoporphyrinogen IX and coproporphyrinogen III oxidase
rrub_NCIM00394	2	rrub_460847843,rrub_460848108	transcriptional regulator, Crp/Fnr family::transcriptional regulator, Crp/Fnr family
rrub_NCIM00395	2	rrub_460843214,rrub_460847446	protein-tyrosine-phosphatase::phosphotyrosine protein phosphatase
rrub_NCIM00396	2	rrub_460843229,rrub_460844849	hypothetical protein RRSWK_06676::hypothetical protein RRSWK_05049
rrub_NCIM00397	2	rrub_460849893,rrub_460843320	hypothetical protein RRSWK_00124::hypothetical protein RRSWK_06469
rrub_NCIM00398	2	rrub_460849949,rrub_460848926	Enoyl-CoA hydratase/isomerase::enoyl-CoA hydratase/isomerase
rrub_NCIM00399	2	rrub_460845588,rrub_460849433	bifunctional acetaldehyde-CoA/alcohol dehydrogenase::iron-containing alcohol dehydrogenase
rrub_NCIM00400	2	rrub_460849436,rrub_460843051	L-aspartate oxidase::succinate dehydrogenase or fumarate reductase, flavoprotein subunit
rrub_NCIM00401	2	rrub_460847408,rrub_460846545	hypothetical protein RRSWK_02589::signal peptide protein
rrub_NCIM00402	2	rrub_460844698,rrub_460849765	sugar hydrolase::glycoside hydrolase family 92 protein
rrub_NCIM00403	2	rrub_460844932,rrub_460844934	Na-Ca exchanger/integrin-beta4 domain protein::Endonuclease/exonuclease/phosphatase domain protein
rrub_NCIM00404	2	rrub_460846430,rrub_460848290	chaperone protein DnaJ::Heat shock protein DnaJ
rrub_NCIM00405	2	rrub_460849806,rrub_460844594	para-aminobenzoate synthase, subunit I::anthranilate synthase, component I
rrub_NCIM00406	2	rrub_460844332,rrub_460847099	hypothetical protein RRSWK_05748::hypothetical protein RRSWK_02708
rrub_NCIM00407	2	rrub_460843195,rrub_460843731	protein containing DUF156::protein containing DUF156
rrub_NCIM00408	2	rrub_460842675,rrub_460848038	K+-dependent Na+/Ca+ exchanger-like protein::YrbG protein
rrub_NCIM00409	2	rrub_283465717,rrub_460847009	fumarate hydratase::fumarate hydratase, class II
rrub_NCIM00410	2	rrub_460844187,rrub_460849009	secreted protein::secreted protein
rrub_NCIM00411	2	rrub_460844097,rrub_460846606	secreted protein::hypothetical protein RRSWK_03353
rrub_NCIM00412	2	rrub_460849280,rrub_460847221	Phosphopyruvate hydratase::phosphopyruvate hydratase
rrub_NCIM00413	2	rrub_460848351,rrub_460848585	mu-protocadherin-putative cell-suface protein::mu-protocadherin-putative cell-suface protein
rrub_NCIM00414	2	rrub_460848356,rrub_460848581	hypothetical protein RRSWK_01622::putative membrane protein
rrub_NCIM00415	2	rrub_460848552,rrub_460843115	Hemolysin-type calcium-binding region::type I secretion target repeat protein
rrub_NCIM00416	2	rrub_460848111,rrub_460848113	secreted protein containing DUF547::membrane protein containing SNARE domain protein
rrub_NCIM00417	2	rrub_460849555,rrub_460844014	integral membrane protein::integral membrane protein
rrub_NCIM00418	2	rrub_460845859,rrub_460849558	lysophospholipase::lysophospholipase
rrub_NCIM00419	2	rrub_460849344,rrub_460845851	oxidoreductase FAD/NAD(P)-binding domain protein::oxidoreductase FAD/NAD(P)-binding domain protein
rrub_NCIM00420	2	rrub_460849069,rrub_460845077	Rhomboid family protein::Peptidase S54, rhomboid
rrub_NCIM00421	2	rrub_460843565,rrub_460845072	cytosine deaminase::CMP/dCMP deaminase zinc-binding protein
rrub_NCIM00422	2	rrub_460849959,rrub_460849957	L-carnitine dehydratase/bile acid-inducible protein F::L-carnitine dehydratase/bile acid-inducible protein F
rrub_NCIM00423	2	rrub_460846248,rrub_460849427	DNA topoisomerase III::DNA topoisomerase I
rrub_NCIM00424	2	rrub_460843930,rrub_460846578	cytochrome c oxidase, subunit II::cytochrome c oxidase, subunit II
rrub_NCIM00425	2	rrub_460843935,rrub_460842891	secreted protein containing DUF1111::secreted protein containing DUF1111
rrub_NCIM00426	2	rrub_460845374,rrub_460845210	fibrinogen-binding protein::fibrinogen-binding protein
rrub_NCIM00427	2	rrub_460845221,rrub_460845216	transcriptional regulator, LacI family::ribose operon repressor
rrub_NCIM00428	2	rrub_460845182,rrub_460846421	deoxyribonuclease gamma::deoxyribonuclease I precursor (DNase I)
rrub_NCIM00429	2	rrub_460843230,rrub_460844852	hypothetical protein RRSWK_06677::putative secreted protein
rrub_NCIM00430	2	rrub_460844105,rrub_460844108	hypothetical protein RRSWK_05805::hypothetical protein RRSWK_05808
rrub_NCIM00431	2	rrub_460844276,rrub_460844436	ammonium transporter::Ammonium transporter
rrub_NCIM00432	2	rrub_460843297,rrub_460845691	peptide methionine sulfoxide reductase::peptide methionine sulfoxide reductase
rrub_NCIM00433	2	rrub_460843600,rrub_460843599	Squalene/phytoene synthase::Squalene/phytoene synthase
rrub_NCIM00434	2	rrub_460846903,rrub_460843846	peptidase C39, bacteriocin processing::putative membrane protein
rrub_NCIM00435	2	rrub_460847174,rrub_460848118	Methyltransferase type 11::Methyltransferase type 11
rrub_NCIM00436	2	rrub_460844457,rrub_460844327	ankyrin repeat protein::ankyrin repeat-containing protein
rrub_NCIM00437	2	rrub_460843410,rrub_460843441	chromosome partitioning protein parA::Cobyrinic acid ac-diamide synthase
rrub_NCIM00438	2	rrub_460846981,rrub_460842640	Prolyl 4-hydroxylase, alpha subunit domain protein::oxidoreductase, 2OG-Fe(II) oxygenase family
rrub_NCIM00439	2	rrub_460842888,rrub_460845045	dihydroxy-acid and 6-phosphogluconate dehydratase::dihydroxy-acid dehydratase
rrub_NCIM00440	2	rrub_460847207,rrub_460848025	propionyl-CoA carboxylase beta chain::propionyl-CoA carboxylase, beta subunit
rrub_NCIM00441	2	rrub_460848759,rrub_460845206	hypothetical protein RRSWK_01203::hypothetical protein RRSWK_04604
rrub_NCIM00442	2	rrub_460846179,rrub_460846347	HxlR family transcriptional regulator::Helix-turn-helix, HxlR type domain protein
rrub_NCIM00443	2	rrub_460845452,rrub_460846340	DNA polymerase III gamma and tau subunit::DNA polymerase III, tau/gamma subunit
rrub_NCIM00444	2	rrub_460846617,rrub_460846618	beta-1,4 N-acetylgalactosaminyltransferase::beta-1,4 N-acetylgalactosaminyltransferase 2
rrub_NCIM00445	2	rrub_460843120,rrub_460848243	Methyltransferase type 11::Methyltransferase type 12
rrub_NCIM00446	2	rrub_460848815,rrub_460848800	hypothetical protein RRSWK_01066::hypothetical protein RRSWK_01051
rrub_NCIM00447	2	rrub_460847714,rrub_460848804	hypothetical protein RRSWK_02238::hypothetical protein RRSWK_01055
rrub_NCIM00448	2	rrub_460848993,rrub_460848806	DNA polymerase family X protein::phosphotransferase domain-containing protein
rrub_NCIM00449	2	rrub_460849456,rrub_460849515	FG-GAP repeat domain protein::FG-GAP repeat domain protein
rrub_NCIM00450	2	rrub_460844676,rrub_460847963	ribokinase::ribokinase-like domain-containing protein
rrub_NCIM00451	2	rrub_460847710,rrub_460847961	peptidase M24 family protein::peptidase M24
rrub_NCIM00452	2	rrub_460847192,rrub_460847966	Nodulation efficiency, NfeD::Nodulation efficiency, NfeD
rrub_NCIM00453	2	rrub_460848155,rrub_460845848	secreted arabinosidase::Alpha-N-arabinofuranosidase
rrub_NCIM00454	2	rrub_460849967,rrub_460845941	Glycoside hydrolase family 42 domain protein::hypothetical protein RRSWK_04035
rrub_NCIM00455	2	rrub_460843991,rrub_460849962	monoamine oxidase regulatory protein::MaoC domain protein dehydratase
rrub_NCIM00456	2	rrub_460846679,rrub_460845202	alanine dehydrogenase/PNT domain protein::alanine dehydrogenase
rrub_NCIM00457	2	rrub_460849590,rrub_460844828	Xylose isomerase domain protein TIM barrel::Xylose isomerase domain protein TIM barrel
rrub_NCIM00458	2	rrub_460844293,rrub_460849548	excinuclease ABC subunit C::excinuclease ABC subunit C
rrub_NCIM00459	2	rrub_460847905,rrub_460846153	uracil-DNA glycosylase superfamily protein::Phage SPO1 DNA polymerase-related protein
rrub_NCIM00460	2	rrub_460844318,rrub_460844319	Bacterial microcompartments protein domain protein::microcompartments protein
rrub_NCIM00461	2	rrub_460848103,rrub_460847173	secreted protein containing Peptidase C14, caspase catalytic domain protein::secreted protein containing Peptidase C14, caspase catalytic domain protein
rrub_NCIM00462	2	rrub_460844312,rrub_460844316	carbon dioxide concentrating mechanism protein CcmL::Ethanolamine utilization protein EutN/carboxysome structural protein Ccml
rrub_NCIM00463	2	rrub_460844317,rrub_460847898	acetate kinase::acetate kinase
rrub_NCIM00464	2	rrub_460848027,rrub_460847208	biotin/lipoyl attachment domain-containing protein::Biotin/lipoyl attachment domain protein
rrub_NCIM00465	2	rrub_460845644,rrub_460847757	peptidase M28::aminopeptidase
rrub_NCIM00466	2	rrub_460848636,rrub_460844203	hypothetical protein RRSWK_01339::hypothetical protein RRSWK_05619
rrub_NCIM00467	2	rrub_460843929,rrub_460846579	cytochrome c oxidase subunit I::cytochrome c oxidase, subunit I
rrub_NCIM00468	2	rrub_460849786,rrub_460848816	chromosomal replication initiator protein dnaA::chromosomal replication initiator protein dnaA
rrub_NCIM00469	2	rrub_460844799,rrub_460847686	hypothetical protein RRSWK_04999::hypothetical protein RRSWK_02210
rrub_NCIM00470	2	rrub_460847680,rrub_460845567	transcriptional regulator, GntR family::transcriptional regulator, GntR family
rrub_NCIM00471	2	rrub_460844298,rrub_460845228	secreted protein::secreted protein
rrub_NCIM00472	2	rrub_460842890,rrub_460846154	tRNA modification GTPase TrmE::small GTP-binding protein
rrub_NCIM00473	2	rrub_460846087,rrub_460844801	signal recognition particle-docking protein FtsY::signal recognition particle protein
rrub_NCIM00474	2	rrub_460848747,rrub_460846351	dihydroorotase, multifunctional complex type::dihydroorotase, multifunctional complex type
rrub_NCIM00475	2	rrub_460849403,rrub_460844286	transmembrane prediction::transmembrane prediction
rrub_NCIM00476	2	rrub_460849892,rrub_460843319	hypothetical protein RRSWK_00123::hypothetical protein RRSWK_06468
rrub_NCIM00477	2	rrub_460844277,rrub_460849190	Glycosyl transferase WecB/TagA/CpsF::glycosyl transferase, WecB/TagA/CpsF family
rrub_NCIM00478	2	rrub_460843501,rrub_460844125	hypothetical protein RRSWK_06418::hypothetical protein RRSWK_05769
rrub_NCIM00479	2	rrub_460847320,rrub_460843026	Cap5J protein-putative transmembrane protein::Cap5J protein-putative transmembrane protein
rrub_NCIM00480	2	rrub_460846711,rrub_460843976	repeat domain protein::60 kDa cysteine-rich outer membrane protein
rrub_NCIM00481	2	rrub_460845907,rrub_460844018	family protein-putative secreted protein::secretion protein HlyD family protein
rrub_NCIM00482	2	rrub_460847184,rrub_460845547	thioredoxin-disulfide reductase::thioredoxin-disulfide reductase
rrub_NCIM00483	2	rrub_460846380,rrub_460848224	protein containing DUF1569::protein containing DUF1569
rrub_NCIM00484	2	rrub_460846918,rrub_460847768	Glycine cleavage H-protein::glycine cleavage system H protein
rrub_NCIM00485	2	rrub_460843074,rrub_460845556	pyrophosphate--fructose-6-phosphate 1-phosphotransferase::6-phosphofructokinase
rrub_NCIM00486	2	rrub_460845462,rrub_460847567	AAA ATPase::AAA ATPase
rrub_NCIM00487	2	rrub_460842896,rrub_460848864	dehydrogenase, subunit C-like protein::Formylmethanofuran dehydrogenase subunit C domain protein
rrub_NCIM00488	2	rrub_460849931,rrub_460846362	Methyltransferase small domain protein::modification methylase, HemK family
rrub_NCIM00489	2	rrub_460846784,rrub_460846783	hypothetical protein RRSWK_03131::putative secreted protein
rrub_NCIM00490	2	rrub_460847826,rrub_460846940	RNA-directed DNA polymerase (Reverse transcriptase)::Retron-type reverse transcriptase
rrub_NCIM00491	2	rrub_283465371,rrub_460846091	serine hydroxymethyltransferase::Glycine hydroxymethyltransferase
rrub_NCIM00492	2	rrub_460843073,rrub_460843090	chemotaxis protein CheX::chemotaxis protein CheX
rrub_NCIM00493	2	rrub_460845434,rrub_460845823	LysR, substrate-binding domain protein::transcriptional regulator, LysR family
rrub_NCIM00494	2	rrub_460848197,rrub_460845048	pyruvate kinase::pyruvate kinase
rrub_NCIM00495	2	rrub_460847870,rrub_460845283	formamidopyrimidine-DNA glycosylase::formamidopyrimidine-DNA glycosylase
rrub_NCIM00496	2	rrub_460848387,rrub_460843329	lipoprotein::lipoprotein
rrub_NCIM00497	2	rrub_460848489,rrub_460845227	protein containing DNA photolyase, FAD-binding/Cryptochrome::deoxyribodipyrimidine photolyase
rrub_NCIM00498	2	rrub_460846743,rrub_460849699	cycloartenol synthase-like protein::cycloartenol synthase-like protein
rrub_NCIM00499	2	rrub_460847830,rrub_460849693	signal peptide protein::signal peptide protein
rrub_NCIM00500	2	rrub_460848280,rrub_460849695	hypothetical protein RRSWK_01700::putative secreted protein
rrub_NCIM00501	2	rrub_460844152,rrub_460847665	transcription regulator LuxR::response regulator
rrub_NCIM00502	2	rrub_460847334,rrub_460849320	site-specific DNA-methyltransferase (cytosine-specific)-putative transcriptional regulator::transcriptional regulator, MerR family
rrub_NCIM00503	2	rrub_460846950,rrub_460843461	translation-associated GTPase::GTPase ObgE
rrub_NCIM00504	2	rrub_460844213,rrub_460844217	hypothetical protein RRSWK_05629::hypothetical protein RRSWK_05633
rrub_NCIM00505	2	rrub_460843779,rrub_460846803	Respiratory-chain NADH dehydrogenase domain 51 kDa subunit, partial::Respiratory-chain NADH dehydrogenase domain 51 kDa subunit
rrub_NCIM00506	2	rrub_460847974,rrub_460844572	hypothetical protein RRSWK_01909::hypothetical protein RRSWK_05321
rrub_NCIM00507	2	rrub_460847114,rrub_460844577	ATP-dependent DNA helicase PcrA::ATP-dependent DNA helicase PcrA
rrub_NCIM00508	2	rrub_460846788,rrub_460843412	N-formylglutamate amidohydrolase::N-formylglutamate amidohydrolase
rrub_NCIM00509	2	rrub_460843020,rrub_460848120	radical SAM domain-containing protein::radical SAM domain-containing protein
rrub_NCIM00510	2	rrub_460848353,rrub_460848584	hypothetical protein RRSWK_01619::Steroid delta5-4-isomerase
rrub_NCIM00511	2	rrub_460843488,rrub_460843960	reverse transcriptase/maturase::reverse transcriptase/maturase
rrub_NCIM00512	2	rrub_460843522,rrub_460843524	alkyl hydroperoxide reductase/ Thiol specific antioxidant/ Mal allergen::hypothetical protein RRSWK_06194
rrub_NCIM00513	2	rrub_460846451,rrub_460843545	permease YjgP/YjgQ family protein::permease YjgP/YjgQ family protein
rrub_NCIM00514	2	rrub_460848260,rrub_460848302	menaquinone biosynthesis methyltransferase related protein::Methyltransferase type 12
rrub_NCIM00515	2	rrub_460848303,rrub_460848306	Phytoene dehydrogenase::phytoene dehydrogenase
rrub_NCIM00516	2	rrub_460847578,rrub_460846227	transposase::transposase
rrub_NCIM00517	2	rrub_460843758,rrub_460847095	asparagine synthetase::asparagine synthase (glutamine-hydrolyzing)
rrub_NCIM00518	2	rrub_460846775,rrub_460848873	signal peptide-containing protein::signal peptide-containing protein
rrub_NCIM00519	2	rrub_460846529,rrub_460847315	Stearoyl-CoA 9-desaturase::delta 9 acyl-lipid fatty acid desaturase
rrub_NCIM00520	2	rrub_460844840,rrub_460846422	pyruvate dehydrogenase, E2 component, dihydrolipoamide acetyltransferase::dihydrolipoyllysine-residue succinyltransferase
rrub_NCIM00521	2	rrub_460847398,rrub_460847403	peptidase C14 caspase catalytic subunit p20::peptidase C14 caspase catalytic subunit p20
rrub_NCIM00522	2	rrub_460847799,rrub_460847798	NHL repeat containing protein::NHL repeat containing protein
rrub_NCIM00523	2	rrub_460849307,rrub_460843087	BLUF domain-containing protein::BLUF domain-containing protein
rrub_NCIM00524	2	rrub_460844469,rrub_460843080	chemotaxis protein CheA::chemotaxis histidine kinase
rrub_NCIM00525	2	rrub_460849559,rrub_460849554	auxin-responsive-like protein::GH3 auxin-responsive promoter family protein
rrub_NCIM00526	2	rrub_460848533,rrub_460844443	membrane-fusion protein::membrane-fusion protein
rrub_NCIM00527	2	rrub_460843887,rrub_460848202	acyl carrier protein::Acyl carrier protein (ACP)
rrub_NCIM00528	2	rrub_460849297,rrub_460847488	Methyltransferase type 11::Methyltransferase type 11
rrub_NCIM00529	2	rrub_460849534,rrub_460845982	secreted protein::putative secreted protein
rrub_NCIM00530	2	rrub_460845967,rrub_460848962	FAD linked oxidase domain protein::FAD linked oxidase domain-containing protein
rrub_NCIM00531	2	rrub_460843166,rrub_460842681	ADP-ribosylation factor-directed GTPase activating protein isoform b::ADP-ribosylation factor-directed GTPase activating protein isoform b-like protein
rrub_NCIM00532	2	rrub_460848400,rrub_460842687	metallophosphoesterase::metallophosphoesterase
rrub_NCIM00533	2	rrub_460847244,rrub_460848066	CoA-binding domain-containing protein::CoA-binding domain-containing protein
rrub_NCIM00534	2	rrub_460845963,rrub_460848208	RNA polymerase, alpha subunit::DNA-directed RNA polymerase subunit alpha
rrub_NCIM00535	2	rrub_460846024,rrub_460847097	redoxin domain-containing protein::Thiol-disulfide oxidoreductase
rrub_NCIM00536	2	rrub_460844707,rrub_460847548	phytoene dehydrogenase::phytoene dehydrogenase
rrub_NCIM00537	2	rrub_460843949,rrub_460843650	hypothetical protein RRSWK_05973::hypothetical protein RRSWK_06320
rrub_NCIM00538	2	rrub_460847606,rrub_460842818	protein containing DUF1680::protein containing DUF1680
rrub_NCIM00539	2	rrub_460847211,rrub_460848135	marR-family transcription regulator::MarR family transcriptional regulator
rrub_NCIM00540	2	rrub_460845522,rrub_460848845	negative regulator of genetic competence ClpC/mecB::protein disaggregation chaperone
rrub_NCIM00541	2	rrub_460848684,rrub_460848683	hypothetical protein RRSWK_01257::hypothetical protein RRSWK_01256
rrub_NCIM00542	2	rrub_460849019,rrub_460843460	Glyceraldehyde-3-phosphate dehydrogenase, type I::Glyceraldehyde-3-phosphate dehydrogenase A
rrub_NCIM00543	2	rrub_460845021,rrub_460847580	membrane fusion protein::membrane fusion protein mtrC, partial
rrub_NCIM00544	2	rrub_460844170,rrub_460843595	thiamine biosynthesis lipoprotein apbE::ApbE-like lipoprotein
rrub_NCIM00545	2	rrub_460844172,rrub_460844173	ABC-3 protein::ABC-3 protein
rrub_NCIM00546	2	rrub_460849780,rrub_460848739	translation elongation factor P::translation elongation factor EF-P
rrub_NCIM00547	2	rrub_460846207,rrub_460845942	putative secreted protein::putative secreted protein
rrub_NCIM00548	2	rrub_460849239,rrub_460844874	diacylglycerol kinase catalytic region::hypothetical protein RRSWK_05074
rrub_NCIM00549	2	rrub_460843356,rrub_460849004	protein containing DUF28::protein containing DUF28
rrub_NCIM00550	2	rrub_460846297,rrub_460846299	poly(beta-D-mannuronate) lyase::alginate lyase precursor
rrub_NCIM00551	2	rrub_460848946,rrub_460843002	putative secreted protein::hypothetical protein RRSWK_07040
rrub_NCIM00552	2	rrub_460847637,rrub_460842617	hypothetical protein RRSWK_02304::hypothetical protein RRSWK_07212
rrub_NCIM00553	2	rrub_460842910,rrub_460849885	hypothetical protein RRSWK_06948::hypothetical protein RRSWK_00116
rrub_NCIM00554	2	rrub_460845348,rrub_460846886	ribonuclease BN::ribonuclease BN
rrub_NCIM00555	2	rrub_460844689,rrub_460845786	putative secreted protein::signal peptide protein
rrub_NCIM00556	3	rrub_460846352,rrub_460845550,rrub_460848844	putative secreted protein::putative secreted protein::putative secreted protein
rrub_NCIM00557	3	rrub_460849831,rrub_460849648,rrub_460843058	Metal-dependent phosphohydrolase, HD region, subdomain protein domain protein::Metal-dependent phosphohydrolase, HD region, subdomain protein domain protein::HD-GYP hydrolase domain-containing protein
rrub_NCIM00558	2	rrub_460844767,rrub_460846737	ketoglutarate semialdehyde dehydrogenase::ketoglutarate semialdehyde dehydrogenase
rrub_NCIM00559	2	rrub_460847322,rrub_460849192	glycosyl transferase, group 1 family::hexosyltransferase
rrub_NCIM00560	2	rrub_460843290,rrub_460844930	glycosyltransferase::membrane protein containing Glycosyl transferase, group 1 domain protein
rrub_NCIM00561	2	rrub_460843104,rrub_460844482	von Willebrand factor type A domain-containing protein::Vault protein inter-alpha-trypsin domain-containing protein
rrub_NCIM00562	2	rrub_460844796,rrub_460846303	protein containing DUF58::membrane protein containing DUF58
rrub_NCIM00563	2	rrub_460844862,rrub_460846290	oxidoreductase domain protein::oxidoreductase domain protein
rrub_NCIM00564	2	rrub_460845993,rrub_460846566	Dystroglycan-type cadherin-like domain protein, partial::Ig domain family
rrub_NCIM00565	2	rrub_460844640,rrub_460845467	hypothetical protein RRSWK_05230::jellyroll fold domain-containing protein

## Sheet: rsal
family accession	family size	gene accession (IMG Gene ID or NCBI GI)	function
rsal_NCIM00001	156	rsal_460929548,rsal_460928402,rsal_460929547,rsal_460927461,rsal_460933970,rsal_460933971,rsal_460933976,rsal_460927129,rsal_460928708,rsal_460934547,rsal_460930867,rsal_460933073,rsal_460933072,rsal_460931147,rsal_460934905,rsal_460931141,rsal_460931142,rsal_460929174,rsal_460930986,rsal_460931719,rsal_460933985,rsal_460930691,rsal_460927233,rsal_460935514,rsal_460927367,rsal_460933960,rsal_4609…	arylsulfatase A::arylsulfatase A::arylsulfatase A::Iduronate-2-sulfatase::arylsulfatase A::sulfatase atsG::arylsulfatase B::arylsulfatase A::arylsulfatase B::mucin-desulfating sulfatase (N-acetylglucosamine-6-sulfatase)::Iduronate-2-sulfatase::sulfatase atsG::choline sulfatase::N-acetylgalactosamine 6-sulfate sulfatase (GALNS)::sulfatase family protein::arylsulfatase::arylsulfatase A::arylsulfata…
rsal_NCIM00002	122	rsal_460933806,rsal_460927574,rsal_460933480,rsal_460927805,rsal_460929279,rsal_460930988,rsal_460930989,rsal_460931261,rsal_460930984,rsal_460930985,rsal_460930983,rsal_460928330,rsal_460934189,rsal_460929700,rsal_460931976,rsal_460935194,rsal_460933656,rsal_460929663,rsal_460928626,rsal_460930668,rsal_460933804,rsal_460933805,rsal_460933800,rsal_460935067,rsal_460929309,rsal_460930753,rsal_4609…	Signal transduction response regulator, receiver region domain protein::sensory transduction histidine kinase, partial::ATP-binding region, ATPase-like domain protein::integral membrane sensor signal transduction histidine kinase::two component transcriptional regulator, LuxR family::sigma-54 dependent DNA-binding response regulator::membrane protein containing ATP-binding region, ATPase-like dom…
rsal_NCIM00003	119	rsal_460934904,rsal_460928406,rsal_460927479,rsal_460928716,rsal_460933974,rsal_460927044,rsal_460929277,rsal_460928240,rsal_460928247,rsal_460931498,rsal_460927882,rsal_460927880,rsal_460931497,rsal_460927886,rsal_460935518,rsal_460930427,rsal_460934186,rsal_460933394,rsal_460935192,rsal_460933964,rsal_460934025,rsal_460933717,rsal_460935198,rsal_460933715,rsal_460929261,rsal_460927639,rsal_4609…	secreted protein containing DUF1559::protein containing DUF1559::protein containing DUF1559::protein containing DUF1559::protein containing DUF1559::secreted protein containing DUF1559::secreted protein containing DUF1559::protein containing DUF1559::secreted protein containing DUF1559::secreted protein containing DUF1559::protein containing DUF1559::secreted protein containing DUF1559::signal pe…
rsal_NCIM00004	74	rsal_460930007,rsal_460928528,rsal_460929988,rsal_460929945,rsal_460935525,rsal_460930482,rsal_460931133,rsal_460934217,rsal_460930101,rsal_460935354,rsal_460930228,rsal_460934253,rsal_460934409,rsal_460929250,rsal_460928893,rsal_460932243,rsal_460934059,rsal_460933508,rsal_460934114,rsal_460927512,rsal_460932207,rsal_460933362,rsal_460928060,rsal_460929183,rsal_460930279,rsal_460929339,rsal_4609…	serine/threonine protein kinase::serine/threonine protein kinase::Serine/threonine protein kinase-related domain protein::Serine/threonine protein kinase domain protein::serine/threonine-protein kinase::serine/threonine-protein kinase::serine/threonine-specific protein kinase::serine/threonine-protein kinase pknB::serine/threonine protein kinase::Serine/threonine protein kinase domain protein::se…
rsal_NCIM00005	62	rsal_460928425,rsal_460930580,rsal_460927341,rsal_460934813,rsal_460934358,rsal_460929541,rsal_460929969,rsal_460931383,rsal_460932338,rsal_460931168,rsal_460928771,rsal_460930940,rsal_460929447,rsal_460928619,rsal_460929272,rsal_460928031,rsal_460930270,rsal_460932362,rsal_460932493,rsal_460927809,rsal_460932121,rsal_460930437,rsal_460935129,rsal_460928788,rsal_460932630,rsal_460930791,rsal_4609…	zinc/manganese/iron ABC transporter, ATP-binding protein::ABC transporter (glutamine transport ATP-binding protein)::phosphate ABC transporter, ATP-binding protein::ABC transporter ATP-binding protein::ABC transporter, ATP-binding protein::ABC transporter-like domain protein::lipoprotein releasing system ATP-binding protein lolD::ABC transporter ATP binding protein::sodium ABC transporter ATP-bin…
rsal_NCIM00006	43	rsal_460931966,rsal_460933896,rsal_460934441,rsal_460933968,rsal_460932885,rsal_460928757,rsal_460932792,rsal_460934579,rsal_460928632,rsal_460927412,rsal_460935124,rsal_460934157,rsal_460931220,rsal_460933234,rsal_460931203,rsal_460931246,rsal_460933684,rsal_460927884,rsal_460935413,rsal_460929024,rsal_460928378,rsal_460931830,rsal_460934207,rsal_460931690,rsal_460934245,rsal_460932545,rsal_4609…	RNA polymerase sigma-70 ECF-like, Rhodopirellula baltica::RNA polymerase sigma-70 ECF-like, Rhodopirellula baltica::RNA polymerase sigma factor RpoE::RNA polymerase ECF-type sigma factor::RNA polymerase ECF-type sigma factor::RNA polymerase sigma-70 ECF-like, Rhodopirellula baltica::RNA polymerase, sigma-24 subunit, ECF subfamily::RNA polymerase sigma-E factor::RNA polymerase sigma-70 ECF-like, R…
rsal_NCIM00007	44	rsal_460931061,rsal_460929967,rsal_460928283,rsal_460927183,rsal_460931969,rsal_460932920,rsal_460935540,rsal_460928635,rsal_460931388,rsal_460928752,rsal_460934650,rsal_460928755,rsal_460933741,rsal_460935144,rsal_460934155,rsal_460934870,rsal_460931262,rsal_460934209,rsal_460930403,rsal_460932919,rsal_460933097,rsal_460933862,rsal_460932544,rsal_460934455,rsal_460928097,rsal_460933962,rsal_4609…	protein containing DUF1549::secreted protein containing DUF1549::secreted protein containing DUF1549::repeat-containing regulatory protein::secreted protein containing DUF1549::protein containing DUF1549::protein containing Cytochrome C, Planctomycete, partial::protein containing DUF1549::membrane protein containing Cytochrome C, Planctomycete domain protein::secreted protein containing DUF1549::…
rsal_NCIM00008	42	rsal_460928811,rsal_460929072,rsal_460928812,rsal_460932808,rsal_460933905,rsal_460927759,rsal_460931026,rsal_460931024,rsal_460931023,rsal_460932477,rsal_460934954,rsal_460930399,rsal_460932991,rsal_460931711,rsal_460931712,rsal_460933522,rsal_460932995,rsal_460933523,rsal_460934953,rsal_460930352,rsal_460927767,rsal_460934363,rsal_460929644,rsal_460929057,rsal_460935196,rsal_460929007,rsal_4609…	glycosyl transferase group 1::glycosyl transferase, group 1::glycosyl transferase group 1::hexosyltransferase::glycosyltransferase::group 1 glycosyl transferase::glycosyl transferase, group 1 family protein::glycosyl transferase, group 1 family protein::glycosyl transferase group 1 protein::Glycosyltransferase::glycosyl transferase group 1::glycosyl transferase group 1::glycosyl transferase, grou…
rsal_NCIM00009	34	rsal_460932299,rsal_460928361,rsal_460928360,rsal_460935463,rsal_460930102,rsal_460934443,rsal_460929659,rsal_460927248,rsal_460932464,rsal_460928486,rsal_460932205,rsal_460928403,rsal_460927379,rsal_460928418,rsal_460929434,rsal_460930011,rsal_460930012,rsal_460934184,rsal_460928642,rsal_460927449,rsal_460934718,rsal_460928604,rsal_460934474,rsal_460928074,rsal_460929340,rsal_460930910,rsal_4609…	cadherin domain/calx-beta domain protein::peptidase domain protein::hypothetical protein RSSM_05837::Cadherin domain protein::outer membrane adhesin-like protein, partial::Peptidase M10A and M12B, matrixin and adamalysin domain protein::Polymorphic membrane protein::peptidase domain-containing protein, partial::extracellular nuclease::xylanase, partial::hypothetical protein RSSM_02698::C-type lec…
rsal_NCIM00010	37	rsal_460927208,rsal_460929855,rsal_460933087,rsal_460931824,rsal_460930589,rsal_460935356,rsal_460935357,rsal_460934541,rsal_460929374,rsal_460927100,rsal_460930453,rsal_460931539,rsal_460932616,rsal_460931758,rsal_460933689,rsal_460934875,rsal_460927964,rsal_460927940,rsal_460930313,rsal_460934584,rsal_460928352,rsal_460933091,rsal_460927098,rsal_460928470,rsal_460927702,rsal_460935348,rsal_4609…	oxidoreductase domain-containing protein::NADH-dependent dehydrogenase::oxidoreductase domain-containing protein::oxidoreductase domain-containing protein::oxidoreductase domain-containing protein::dehydrogenase::oxidoreductase domain-containing protein::oxidoreductase domain-containing protein::oxidoreductase, Gfo/Idh/MocA family::oxidoreductase domain-containing protein::oxidoreductase domain p…
rsal_NCIM00011	37	rsal_460929965,rsal_460928282,rsal_460934210,rsal_460932543,rsal_460932921,rsal_460931063,rsal_460928636,rsal_460928753,rsal_460928751,rsal_460935143,rsal_460934156,rsal_460933739,rsal_460934871,rsal_460931263,rsal_460932012,rsal_460933098,rsal_460931970,rsal_460933867,rsal_460933961,rsal_460934456,rsal_460929514,rsal_460934576,rsal_460934243,rsal_460933845,rsal_460931015,rsal_460927130,rsal_4609…	secreted protein containing DUF1501, partial::protein containing DUF1501::secreted protein containing DUF1501::secreted protein containing DUF1501::protein containing DUF1501::secreted protein containing DUF1501::protein containing DUF1501::secreted protein containing DUF1501::secreted protein containing DUF1501::secreted protein containing DUF1501::secreted protein containing DUF1501::secreted p…
rsal_NCIM00012	29	rsal_460933993,rsal_460927225,rsal_460934538,rsal_460927366,rsal_460935542,rsal_460929691,rsal_460931143,rsal_460934527,rsal_460928243,rsal_460929158,rsal_460928849,rsal_460928467,rsal_460932871,rsal_460932326,rsal_460933462,rsal_460932751,rsal_460931500,rsal_460934873,rsal_460933885,rsal_460933966,rsal_460930464,rsal_460932896,rsal_460934536,rsal_460927401,rsal_460930240,rsal_460933434,rsal_4609…	transcriptional regulator, AraC family::transcriptional regulator, AraC family::transcriptional regulator, AraC family::xylose operon regulatory protein::AraC family transcriptional regulator::AraC family transcriptional regulator::xylose operon regulatory protein::xylose operon regulatory protein::xylose operon regulatory protein::transcriptional regulator, AraC/XylS family::xylose operon regula…
rsal_NCIM00013	26	rsal_460931967,rsal_460933897,rsal_460928756,rsal_460932884,rsal_460931060,rsal_460928631,rsal_460927411,rsal_460933233,rsal_460931202,rsal_460933683,rsal_460927885,rsal_460934208,rsal_460929023,rsal_460931831,rsal_460935412,rsal_460932931,rsal_460934244,rsal_460932934,rsal_460934578,rsal_460933824,rsal_460932567,rsal_460933714,rsal_460927294,rsal_460929166,rsal_460934901,rsal_460934498	FecR protein domain protein::FecR protein domain protein::FecR protein::FecR protein domain protein::FecR protein domain protein::FecR protein domain protein::FecR protein domain protein::FecR protein domain protein::hypothetical protein RSSM_03530::FecR protein domain protein::FecR protein domain protein::FecR protein domain protein::FecR protein domain protein::FecR protein domain protein::FecR…
rsal_NCIM00014	25	rsal_460935523,rsal_460927938,rsal_460931906,rsal_460931869,rsal_460930841,rsal_460928676,rsal_460933385,rsal_460927169,rsal_460931898,rsal_460935104,rsal_460933404,rsal_460933446,rsal_460929594,rsal_460932018,rsal_460934205,rsal_460935260,rsal_460928668,rsal_460931058,rsal_460929123,rsal_460930759,rsal_460934414,rsal_460933621,rsal_460927070,rsal_460929138,rsal_460932764	3-oxoacyl-[acyl-carrier-protein] reductase::short chain dehydrogenase/reductase family oxidoreductase::3-oxoacyl-(acyl-carrier-protein) reductase::short-chain dehydrogenase/reductase SDR::3-oxoacyl-[acyl-carrier-protein] reductase::Enoyl-(acyl-carrier-protein) reductase::short-chain dehydrogenase/reductase SDR::short-chain dehydrogenase/reductase SDR::short-chain dehydrogenase/reductase SDR::gluc…
rsal_NCIM00015	26	rsal_460934445,rsal_460930340,rsal_460927089,rsal_460933654,rsal_460934566,rsal_460935059,rsal_460927120,rsal_460933761,rsal_460927329,rsal_460934078,rsal_460934072,rsal_460928947,rsal_460928889,rsal_460930702,rsal_460933409,rsal_460928966,rsal_460930339,rsal_460935472,rsal_460935434,rsal_460934453,rsal_460927397,rsal_460935494,rsal_460934923,rsal_460930205,rsal_460931723,rsal_460932761	Pyrrolo-quinoline quinone::Pyrrolo-quinoline quinone::serine/threonine protein kinase related protein-like protein::Pyrrolo-quinoline quinone::pyrrolo-quinoline quinone::Pyrrolo-quinoline quinone::serine/threonine protein kinase::serine/threonine protein kinase related protein::Pyrrolo-quinoline quinone::polyvinylalcohol dehydrogenase::Pyrrolo-quinoline quinone::serine/threonine protein kinase re…
rsal_NCIM00016	26	rsal_460928817,rsal_460929717,rsal_460932098,rsal_460927732,rsal_460927798,rsal_460927775,rsal_460927774,rsal_460932095,rsal_460928044,rsal_460930575,rsal_460931774,rsal_460931361,rsal_460929865,rsal_460930888,rsal_460929642,rsal_460933596,rsal_460927765,rsal_460932686,rsal_460929456,rsal_460934750,rsal_460927766,rsal_460934927,rsal_460932088,rsal_460934865,rsal_460928078,rsal_460932767	GDP-mannose 4,6-dehydratase, partial::vitamin K epoxide reductase::CDP-glucose 4,6-dehydratase::GDP-mannose 4,6-dehydratase::nucleotide sugar epimerase::NAD-dependent epimerase/dehydratase::CDP-tyvelose epimerase::NAD-dependent epimerase/dehydratase::nucleoside-diphosphate-sugar epimerase::NAD-dependent epimerase/dehydratase::dTDP-D-glucose-4,6-dehydratase::oxidoreductase::UDP-glucose 4-epimerase…
rsal_NCIM00017	22	rsal_460928507,rsal_460928327,rsal_460927348,rsal_460933898,rsal_460931943,rsal_460935054,rsal_460934522,rsal_460927282,rsal_460931540,rsal_460928476,rsal_460927099,rsal_460928471,rsal_460927272,rsal_460932562,rsal_460932563,rsal_460932564,rsal_460928493,rsal_460929089,rsal_460930227,rsal_460930500,rsal_460932319,rsal_460930650	Alpha-L-fucosidase::glycosyl hydrolase::glycosyl hydrolase::glycoside hydrolase family 29 (alpha-L-fucosidase), partial::Glycoside hydrolase, family 29, subgroup::coagulation factor 5/8 type domain protein::Glycoside hydrolase, family 29, subgroup::Glycoside hydrolase, family 29, subgroup::Plasma alpha-L-fucosidase::glycosyl hydrolase::Glycoside hydrolase, family 29, subgroup::glycoside hydrolase…
rsal_NCIM00018	22	rsal_460933183,rsal_460933957,rsal_460928938,rsal_460935403,rsal_460933700,rsal_460929230,rsal_460931347,rsal_460928848,rsal_460929020,rsal_460935005,rsal_460928761,rsal_460931071,rsal_460931073,rsal_460934533,rsal_460934738,rsal_460932277,rsal_460933696,rsal_460933692,rsal_460933455,rsal_460933456,rsal_460927890,rsal_460933698	glycosyl hydrolase family 2, sugar binding domain protein::glycoside hydrolase family 2 sugar binding protein::glycoside hydrolase family 2, sugar binding protein::glycoside hydrolase family 2 sugar binding protein::beta-galactosidase::secreted protein containing Glycoside hydrolase family 2, TIM barrel domain protein::glycosyl hydrolase family 2, sugar binding domain protein::glycosyl hydrolase …
rsal_NCIM00019	19	rsal_460931754,rsal_460928501,rsal_460928580,rsal_460935072,rsal_460934832,rsal_460927529,rsal_460931868,rsal_460931591,rsal_460928600,rsal_460932842,rsal_460933644,rsal_460932307,rsal_460928613,rsal_460932541,rsal_460930256,rsal_460934674,rsal_460930167,rsal_460927465,rsal_460933571	magnesium chelatase subunit I::methanol dehydrogenase regulator (moxR)-like protein::methanol dehydrogenase regulatory protein::methanol dehydrogenase regulator (moxR)-like protein::ATPase associated with various cellular activities AAA_5::methanol dehydrogenase regulatory protein::methanol dehydrogenase regulatory protein::Holliday junction DNA helicase RuvB::methanol dehydrogenase regulator (mo…
rsal_NCIM00020	19	rsal_460930397,rsal_460934746,rsal_460932022,rsal_460929320,rsal_460934108,rsal_460928342,rsal_460931638,rsal_460930802,rsal_460933843,rsal_460932546,rsal_460930318,rsal_460928898,rsal_460932047,rsal_460932316,rsal_460929696,rsal_460928746,rsal_460929454,rsal_460934052,rsal_460929417	secreted protein containing DUF1080::protein containing DUF1080::secreted protein containing DUF1080::putative secreted protein::protein containing DUF1080::secreted glycosyl hydrolase::secreted protein containing DUF1080::secreted glycosyl hydrolase::protein containing DUF1080::hypothetical protein RSSM_02470::secreted protein containing DUF1080::secreted protein containing DUF1080::alpha-L-rham…
rsal_NCIM00021	19	rsal_460928170,rsal_460927510,rsal_460933109,rsal_460934224,rsal_460931118,rsal_460927154,rsal_460929176,rsal_460928928,rsal_460932857,rsal_460930090,rsal_460935266,rsal_460935267,rsal_460933407,rsal_460932755,rsal_460934662,rsal_460929908,rsal_460928959,rsal_460934557,rsal_460928054	transporter AcrB/D/F family protein::Acriflavin resistance protein::RND transporter, HAE1/HME family, permease protein::heavy metal efflux pump, CzcA family protein::acriflavin resistance protein, partial::cation efflux system protein::transporter hydrophobe/amphiphile efflux-1 (HAE1) family::multidrug resistance protein, AcrB/AcrD/AcrF family protein::Cation/multidrug efflux pump::heavy metal ef…
rsal_NCIM00022	18	rsal_460929616,rsal_460928377,rsal_460933216,rsal_460931670,rsal_460930578,rsal_460929108,rsal_460929422,rsal_460929011,rsal_460931890,rsal_460930708,rsal_460927687,rsal_460932068,rsal_460931714,rsal_460930576,rsal_460935238,rsal_460929539,rsal_460935235,rsal_460934026	2-amino-3-ketobutyrate coenzyme A ligase::non-ribosomal peptide synthase::Phosphopantetheine-binding domain protein::long-chain fatty-acid-CoA ligase::cyanopeptolin synthetase::polyketide synthase type I::peptide synthase::Beta-ketoacyl synthase, partial::acetyl-coenzyme a synthetase::Glycine C-acetyltransferase::long-chain-fatty-acid--CoA ligase::KAPA synthase-II::pyoverdine synthetase D::protei…
rsal_NCIM00023	18	rsal_460933756,rsal_460933199,rsal_460929270,rsal_460931746,rsal_460933108,rsal_460928169,rsal_460928958,rsal_460929177,rsal_460933791,rsal_460928053,rsal_460935265,rsal_460929907,rsal_460934663,rsal_460932754,rsal_460929749,rsal_460932856,rsal_460929871,rsal_460934556	RND family efflux transporter MFP subunit, partial::efflux transporter, RND family, MFP subunit::Efflux transporter, RND family, MFP subunit::secretion protein HlyD family protein::membrane-fusion protein::efflux transporter, RND family, MFP subunit::RND family efflux transporter MFP subunit::efflux transporter RND family, MFP subunit::HlyD family secretion protein::efflux transporter RND family,…
rsal_NCIM00024	18	rsal_460932990,rsal_460927762,rsal_460930566,rsal_460931461,rsal_460932089,rsal_460927929,rsal_460931028,rsal_460927386,rsal_460932993,rsal_460927697,rsal_460930715,rsal_460931726,rsal_460933832,rsal_460933527,rsal_460933526,rsal_460927586,rsal_460930794,rsal_460932035	glycosyl transferase, group 2 family::glycosyl transferase family protein::family 2 glycosyl transferase::glycosyl transferase family 2::glycosyl transferase, group 2 family protein::glycosyl transferase family 2::glycosyl transferase family 2::Dolichyl-phosphate beta-D-mannosyltransferase::glycosyl transferase, family 2 protein::glycosyl transferase, group 2 family protein::glycosyl transferase,…
rsal_NCIM00025	17	rsal_460933154,rsal_460931416,rsal_460928398,rsal_460935272,rsal_460931642,rsal_460927224,rsal_460929430,rsal_460934374,rsal_460933044,rsal_460934565,rsal_460930886,rsal_460930517,rsal_460932280,rsal_460934682,rsal_460927595,rsal_460928308,rsal_460935024	thioredoxin::Thioredoxin domain-containing protein::FixW protein::thioredoxin::Thioredoxin::Thiol-disulfide oxidoreductase::alkyl hydroperoxide reductase/ thiol specific antioxidant/ Mal allergen::thioredoxin::redoxin domain-containing protein::redoxin domain-containing protein::FixW protein::thioredoxin related protein::thioredoxin::thioredoxin family protein::alkyl hydroperoxide reductase/ Thio…
rsal_NCIM00026	17	rsal_460934312,rsal_460934036,rsal_460929735,rsal_460931193,rsal_460929321,rsal_460929322,rsal_460930242,rsal_460932127,rsal_460927791,rsal_460935307,rsal_460931396,rsal_460932311,rsal_460933578,rsal_460931516,rsal_460933710,rsal_460934405,rsal_460933686	membrane-bound dehydrogenase domain-containing protein::membrane-bound dehydrogenase domain-containing protein::membrane-bound dehydrogenase domain-containing protein, partial::membrane-bound dehydrogenase domain-containing protein::membrane-bound dehydrogenase domain-containing protein::membrane-bound dehydrogenase domain-containing protein::secreted glycosyl hydrolase::membrane-bound dehydrogen…
rsal_NCIM00027	16	rsal_460933650,rsal_460928612,rsal_460929970,rsal_460929785,rsal_460931753,rsal_460933645,rsal_460933841,rsal_460932540,rsal_460932170,rsal_460931547,rsal_460934406,rsal_460932841,rsal_460934675,rsal_460927463,rsal_460933570,rsal_460928579	membrane protein containing DUF58::secreted protein containing DUF58::protein containing DUF58::protein containing DUF58::hypothetical protein RSSM_03061::protein containing DUF58::hypothetical protein RSSM_01350::protein containing DUF58::hypothetical protein RSSM_02720::hypothetical protein RSSM_03262, partial::protein containing DUF58::protein containing DUF58::hypothetical protein RSSM_00689:…
rsal_NCIM00028	14	rsal_460931002,rsal_460931146,rsal_460933182,rsal_460934041,rsal_460929728,rsal_460930362,rsal_460935068,rsal_460932027,rsal_460929881,rsal_460927184,rsal_460932889,rsal_460928581,rsal_460932943,rsal_460932028	alpha-L-fucosidase::glycoside hydrolase family 95::glycoside hydrolase family 95::putative secreted protein::Dienelactone hydrolase domain protein::alpha-L-fucosidase::glycoside hydrolase, family 95::hypothetical protein RSSM_02846::alpha-L-fucosidase, partial::Alpha-L-fucosidase::hypothetical protein RSSM_02145::Alpha-L-fucosidase, partial::glycoside hydrolase family 95::hypothetical protein RSS…
rsal_NCIM00029	14	rsal_460931000,rsal_460931911,rsal_460931140,rsal_460935323,rsal_460934127,rsal_460934532,rsal_460928301,rsal_460929656,rsal_460934537,rsal_460933454,rsal_460931076,rsal_460933443,rsal_460929022,rsal_460934530	Glycoside hydrolase::hypothetical protein RSSM_02914::lipoprotein::Glycoside hydrolase::Glycoside hydrolase, partial::Glycoside hydrolase, family 43::putative secreted protein::glycoside hydrolase family 43, partial::Glycoside hydrolase::lipoprotein::lipoprotein::Glycoside hydrolase::Glycoside hydrolase::glycoside hydrolase
rsal_NCIM00030	13	rsal_460927234,rsal_460927235,rsal_460933949,rsal_460927230,rsal_460934906,rsal_460927229,rsal_460927228,rsal_460933950,rsal_460933951,rsal_460934479,rsal_460932045,rsal_460931717,rsal_460933185	alfa-L-rhamnosidase::alpha-L-rhamnosidase::glycoside hydrolase family protein, partial::alfa-L-rhamnosidase::Alpha-L-rhamnosidase::alpha-L-rhamnosidase::alfa-L-rhamnosidase::alpha-L-rhamnosidase::alpha-L-rhamnosidase::alpha-L-rhamnosidase::alpha-L-rhamnosidase::alfa-L-rhamnosidase::glycoside hydrolase, family 78
rsal_NCIM00031	13	rsal_460931803,rsal_460928046,rsal_460928047,rsal_460930029,rsal_460933999,rsal_460931802,rsal_460931186,rsal_460930278,rsal_460930221,rsal_460930562,rsal_460929307,rsal_460930995,rsal_460931188	twitching motility protein PilT::general secretion pathway protein E::twitching motility protein PilT::general secretion pathway protein E::type IV-A pilus assembly ATPase PilB::type IV-A pilus assembly ATPase PilB::type IV-A pilus assembly ATPase PilB::type II/IV secretion system protein, TadA subfamily protein::general secretion pathway protein E::type IV-A pilus assembly ATPase PilB, partial::…
rsal_NCIM00032	12	rsal_460933601,rsal_460927643,rsal_460927986,rsal_460927987,rsal_460928918,rsal_460927988,rsal_460929051,rsal_460929756,rsal_460930571,rsal_460927853,rsal_460934940,rsal_460935189	PDZ/DHR/GLGF domain protein::peptidase S1C, Do::protease Do::periplasmic serine protease DegS::DO serine protease::peptidase S1 and S6 chymotrypsin::protease degQ::serine protease DO::serine protease::serine endoprotease::serine protease Do::serine endoprotease
rsal_NCIM00033	12	rsal_460931217,rsal_460930366,rsal_460931354,rsal_460932679,rsal_460932568,rsal_460928332,rsal_460928333,rsal_460927275,rsal_460931334,rsal_460933247,rsal_460932944,rsal_460932883	secreted protein containing DUF1592::secreted protein containing PA14::protein containing DUF1588::membrane or secreted protein containing DUF1592::secreted protein containing DUF1595::protein containing DUF1592::protein containing DUF1588::secreted protein containing DUF1587::protein containing DUF1592::secreted protein containing DUF1588::protein containing DUF1592::secreted protein containing …
rsal_NCIM00034	11	rsal_460929319,rsal_460929971,rsal_460935225,rsal_460929596,rsal_460935369,rsal_460932040,rsal_460927273,rsal_460932783,rsal_460928557,rsal_460929862,rsal_460932897	lipase, putative esterase::lipase/esterase::lipase/esterase::lipase/esterase, partial::pectin acetylesterase::lipase/esterase::lipase/esterase::Esterase/lipase-like protein::Esterase/lipase::esterase/lipase-like protein::alpha/beta hydrolase domain-containing protein
rsal_NCIM00035	11	rsal_460927032,rsal_460928042,rsal_460934761,rsal_460929939,rsal_460928447,rsal_460933597,rsal_460931412,rsal_460927588,rsal_460934758,rsal_460933859,rsal_460933567	hypothetical protein RSSM_06877::GTP-binding protein LepA::translation elongation factor Tu::GTP-binding protein LepA::translation initiation factor IF-2::GTP-binding protein TypA/BipA::Translation elongation factor EFG/EF2::adenylylsulfate kinase::bifunctional sulfate adenylyltransferase subunit 1/adenylylsulfate kinase protein::translation elongation factor 2 (EF-2/EF-G)::translation elongation…
rsal_NCIM00036	11	rsal_460931335,rsal_460928334,rsal_460930365,rsal_460931216,rsal_460928950,rsal_460929297,rsal_460933248,rsal_460927274,rsal_460931353,rsal_460932945,rsal_460932882	secreted protein containing DUF1552::secreted protein containing DUF1552::secreted protein containing DUF1552::protein containing DUF1552::hypothetical protein RSSM_05367::protein containing DUF1552::protein containing DUF1552::protein containing DUF1552::secreted protein containing DUF1552::secreted protein containing DUF1552::secreted protein containing DUF1552
rsal_NCIM00037	10	rsal_460932535,rsal_460927097,rsal_460927502,rsal_460935481,rsal_460928228,rsal_460934440,rsal_460934681,rsal_460933977,rsal_460929526,rsal_460932536	hypothetical protein RSSM_02459::putative secreted protein::hypothetical protein RSSM_06530::hypothetical protein RSSM_00028::hypothetical protein RSSM_05945::hypothetical protein RSSM_00871::putative secreted protein::putative membrane protein::hypothetical protein RSSM_04890::hypothetical protein RSSM_02460
rsal_NCIM00038	10	rsal_460930931,rsal_460933120,rsal_460930346,rsal_460934947,rsal_460932954,rsal_460935110,rsal_460934544,rsal_460932415,rsal_460929245,rsal_460933542	exopolysaccharide polymerization protein::exopolysaccharide biosynthesis protein::capsular exopolysaccharide family::Exopolysaccharide synthesis protein::chromosome partitioning protein parA::chromosome partitioning protein ParA::Cobyrinic acid ac-diamide synthase::cobyrinic acid a,c-diamide synthase::Exopolysaccharide synthesis protein::Exopolysaccharide synthesis protein
rsal_NCIM00039	10	rsal_460934021,rsal_460932257,rsal_460934511,rsal_460928057,rsal_460927501,rsal_460928671,rsal_460929004,rsal_460930543,rsal_460934966,rsal_460927069	UbiE/COQ5 methyltransferase::Methyltransferase type 11 domain protein::Methyltransferase type 11::methyltransferase type 11::Methyltransferase type 11::methyltransferase type 11::Methyltransferase type 11 domain protein::phosphatidylethanolamine N-methyltransferase::ubiquinone/menaquinone biosynthesis methyltransferase::Methyltransferase type 11 domain protein
rsal_NCIM00040	10	rsal_460927742,rsal_460930658,rsal_460934849,rsal_460931300,rsal_460928391,rsal_460933477,rsal_460930472,rsal_460927575,rsal_460929449,rsal_460933504	DEAD/H associated domain protein::ATP-dependent DNA helicase RecQ::cold-shock deAd box protein a::DEAD/DEAH box helicase domain-containing protein::ATP-dependent DNA helicase RecQ::DEAD/DEAH box helicase domain-containing protein::DEAD/DEAH box helicase domain-containing protein::ATP-dependent DNA helicase, recq family::DEAD/DEAH box helicase domain-containing protein::ATP-dependent DNA helicase,…
rsal_NCIM00041	9	rsal_460928815,rsal_460931027,rsal_460927768,rsal_460933520,rsal_460931212,rsal_460932997,rsal_460932983,rsal_460927753,rsal_460932989	chloramphenicol acetyltransferase::colanic acid biosynthesis acetyltransferase WcaF::hexapeptide repeat-containing transferase::O-acetyltransferase::Chloramphenicol O-acetyltransferase::serine O-acetyltransferase::serine O-acetyltransferase::acetyltransferase::galactoside acetyltransferase
rsal_NCIM00042	9	rsal_460934412,rsal_460929187,rsal_460931916,rsal_460934745,rsal_460934113,rsal_460927056,rsal_460930008,rsal_460927511,rsal_460933812	extracytoplasmic function alternative sigma factor::RNA polymerase sigma-H factor::RNA polymerase sigma-H factor::RNA polymerase sigma-70 domain protein::RNA polymerase sigma-H factor::ECF sigma factor::extracytoplasmic function alternative sigma factor::extracytoplasmic function alternative sigma factor::RNA polymerase sigma-H factor
rsal_NCIM00043	9	rsal_460933887,rsal_460934526,rsal_460927658,rsal_460928245,rsal_460927365,rsal_460929922,rsal_460929923,rsal_460934535,rsal_460932011	sodium/myo-inositol cotransporter 2::solute carrier family 5, member 3::sodium/solute symporter family protein glucose transporter::sodium/solute symporter family protein::Na+/solute symporter::sodium/glucose cotransporter::sodium/glucose cotransporter::Na+/solute symporter::SSS sodium solute transporter superfamily
rsal_NCIM00044	9	rsal_460934396,rsal_460927503,rsal_460931008,rsal_460927976,rsal_460927975,rsal_460930194,rsal_460931068,rsal_460930193,rsal_460933978	Biopolymer transport protein ExbD/TolR::Biopolymer transport protein ExbD/TolR::Biopolymer transport protein ExbD/TolR::biopolymertransporter ExbD/TolR::biopolymer transport protein ExbD/TolR::biopolymer transport exbD2 protein::Biopolymer transport protein ExbD/TolR::Biopolymer transport protein ExbD/TolR::Biopolymer transport protein ExbD/TolR
rsal_NCIM00045	9	rsal_460927820,rsal_460933149,rsal_460934163,rsal_460929325,rsal_460934057,rsal_460933835,rsal_460933445,rsal_460931931,rsal_460927665	ketoglutarate semialdehyde dehydrogenase::aldehyde dehydrogenase family protein::succinate-semialdehyde dehydrogenase (NADP+), partial::aldehyde dehydrogenase B::ketoglutarate semialdehyde dehydrogenase::NAD-dependent aldehyde dehydrogenase::succinate-semialdehyde dehydrogenase I::aldehyde dehydrogenase::succinate-semialdehyde dehydrogenase (NADP+)
rsal_NCIM00046	8	rsal_460933217,rsal_460930577,rsal_460933085,rsal_460929834,rsal_460930838,rsal_460930843,rsal_460930455,rsal_460934596	polyketide synthase type I, partial::Polyketide synthase::3-oxoacyl-[acyl-carrier-protein] synthase II::3-oxoacyl-(acyl-carrier-protein) synthase II::3-oxoacyl-(acyl-carrier-protein) synthase 2::malonyl CoA-acyl carrier protein transacylase::beta-ketoacyl-acyl-carrier-protein synthase II::3-oxoacyl-(acyl-carrier-protein) synthase II
rsal_NCIM00047	10	rsal_460931787,rsal_460933221,rsal_460930442,rsal_460928964,rsal_460935248,rsal_460932226,rsal_460932864,rsal_460934002,rsal_460933763,rsal_460934464	Cadherin domain protein, partial::adhesin-like protein, partial::outer membrane adhesin like proteiin::eosinophil peroxidase::Glucose/sorbosone dehydrogenase-like protein::peroxidase::outer membrane adhesin like proteiin::protein containing Legume lectin, beta chain::outer membrane adhesin-like protein::Pentaxin, partial
rsal_NCIM00048	9	rsal_460932874,rsal_460934423,rsal_460931590,rsal_460932242,rsal_460927821,rsal_460933510,rsal_460934060,rsal_460928943,rsal_460928572	RNA polymerase sigma-E type, Rhodopirellula baltica::RNA polymerase sigma-E type, Rhodopirellula baltica::RNA polymerase sigma-E type, Rhodopirellula baltica::RNA polymerase sigma-E type, Rhodopirellula baltica::RNA polymerase, sigma-24 subunit, ECF subfamily::RNA polymerase sigma-E factor::RNA-polymerase sigma-E factor::RNA polymerase, sigma-24 subunit, ECF subfamily::RNA polymerase sigma-E type…
rsal_NCIM00049	12	rsal_460928516,rsal_460927645,rsal_460935526,rsal_460934371,rsal_460928737,rsal_460930010,rsal_460930489,rsal_460929118,rsal_460930564,rsal_460929459,rsal_460928883,rsal_460927657	HD-GYP hydrolase domain containing protein::GGDEF domain protein::FHA domain/GGDEF domain-containing protein::Diguanylate cyclase, predicted::HD-GYP domain-containing protein::diguanylate cyclase::response regulator receiver modulated metal dependent phosphohydrolase::diguanylate cyclase and metal dependent phosphohydrolase::response regulator receiver modulated diguanylate cyclase::two-component…
rsal_NCIM00050	8	rsal_460930519,rsal_460935445,rsal_460931152,rsal_460927921,rsal_460934171,rsal_460928258,rsal_460933736,rsal_460930656	putative secreted protein::putative secreted protein::secreted protein containing PDZ/DHR/GLGF domain protein::putative secreted protein, partial::putative secreted protein::hypothetical protein RSSM_05875::hypothetical protein RSSM_01451::hypothetical protein RSSM_03963
rsal_NCIM00051	8	rsal_460934743,rsal_460929355,rsal_460933203,rsal_460932508,rsal_460928351,rsal_460934361,rsal_460930230,rsal_460928212	FHA domain protein::Forkhead-associated domain protein::Diguanylate phosphodiesterase, predicted::FHA domain containing protein::protein serine phosphatase with GAF(s) sensor(s)::FHA domain containing protein::FHA domain protein::Forkhead-associated domain protein
rsal_NCIM00052	8	rsal_460929646,rsal_460931895,rsal_460932276,rsal_460934459,rsal_460931215,rsal_460928180,rsal_460932660,rsal_460934488	malto-oligosyltrehalose trehalohydrolase::isoamylase::glycogen branching enzyme::protein containing 1,4-alpha-glucan branching enzyme, core region::glycogen branching enzyme::glycogen debranching enzyme GlgX, partial::glycogen debranching enzyme GlgX::isoamylase
rsal_NCIM00053	8	rsal_460927115,rsal_460934632,rsal_460933690,rsal_460927387,rsal_460927498,rsal_460930659,rsal_460927398,rsal_460932599	Xylose isomerase domain-containing protein TIM barrel::Xylose isomerase domain-containing protein TIM barrel::hydroxypyruvate isomerase::Xylose isomerase domain-containing protein TIM barrel::sugar phosphate isomerase/epimerase::D-tagatose 3-epimerase::sugar phosphate isomerase/epimerase::Xylose isomerase-type TIM barrel domain protein
rsal_NCIM00054	8	rsal_460934076,rsal_460935501,rsal_460927054,rsal_460934635,rsal_460927739,rsal_460933476,rsal_460931477,rsal_460935391	SufS subfamily cysteine desulfurase::aminotransferase class V::aminotransferase class V::aminotransferase class V::cysteine desulfurase family protein::cysteine desulfurase IscS::class V aminotransferase::cysteine desulfurase family protein
rsal_NCIM00055	7	rsal_460934280,rsal_460933778,rsal_460931702,rsal_460934179,rsal_460929489,rsal_460927899,rsal_460928791	regulatory protein::pyridine nucleotide-disulfide oxidoreductase dimerization region::dihydrolipoyl dehydrogenase::nitrite reductase (NAD(P)H) large subunit::soluble pyridine nucleotide transhydrogenase::dihydrolipoyl dehydrogenase::NADH oxidase
rsal_NCIM00056	7	rsal_460929615,rsal_460931151,rsal_460930927,rsal_460928550,rsal_460930498,rsal_460933447,rsal_460934546	L-threonine 3-dehydrogenase::Alcohol dehydrogenase zinc-binding domain protein::alcohol dehydrogenase zinc-binding domain protein::zinc-type alcohol dehydrogenase-like protein YjgB::zinc-type alcohol dehydrogenase protein::alcohol dehydrogenase GroES domain-containing protein::glutathione-independent formaldehyde dehydrogenase
rsal_NCIM00057	7	rsal_460929783,rsal_460927175,rsal_460929143,rsal_460932538,rsal_460935094,rsal_460934677,rsal_460929692	putative membrane protein::membrane protein containing DUF1355::membrane protein containing DUF1355::membrane protein containing DUF1355::putative membrane protein::putative membrane protein::protein containing DUF1355
rsal_NCIM00058	7	rsal_460933895,rsal_460934523,rsal_460934162,rsal_460932750,rsal_460933697,rsal_460929111,rsal_460933444	mandelate racemase/muconate lactonizing enzyme domain-containing protein::mandelate racemase muconate lactonizing enzyme family protein::Galactonate dehydratase::mandelate racemase/muconate lactonizing enzyme family protein::mandelate racemase/muconate lactonizing protein::Mandelate racemase/muconate lactonizing enzyme family protein::Mandelate racemase/muconate lactonizing protein
rsal_NCIM00059	7	rsal_460933882,rsal_460929233,rsal_460927327,rsal_460934247,rsal_460935298,rsal_460934251,rsal_460935408	ASPIC/UnbV domain protein::ASPIC/UnbV domain-containing protein::FG-GAP repeat-containing protein::ASPIC/UnbV domain-containing protein::ASPIC/UnbV domain-containing protein::ASPIC/UnbV domain-containing protein::ASPIC/UnbV domain protein
rsal_NCIM00060	7	rsal_460934356,rsal_460928114,rsal_460931823,rsal_460927260,rsal_460928707,rsal_460929657,rsal_460933453	beta-agarase::glycoside hydrolase family 16::glycoside hydrolase family 16::kappa-carrageenase precursor::kappa-carrageenase precursor::glycoside hydrolase family 16::glycoside hydrolase family 16
rsal_NCIM00061	7	rsal_460929722,rsal_460935045,rsal_460935046,rsal_460929280,rsal_460928331,rsal_460931260,rsal_460930653	signal transduction histidine kinase::sensor histidine kinase::histidine kinase::sensor histidine kinase::integral membrane sensor signal transduction histidine kinase::signal transduction histidine kinase::signal transduction histidine kinase
rsal_NCIM00062	7	rsal_460934983,rsal_460929557,rsal_460931231,rsal_460930032,rsal_460928000,rsal_460930236,rsal_460930238	transposase::transposase IS4 family protein::transposase IS4 family protein, partial::transposase IS4 family protein::transposase IS4 family protein, partial::transposase IS4 family protein::transposase IS4 family protein
rsal_NCIM00063	7	rsal_460927846,rsal_460934939,rsal_460930197,rsal_460933121,rsal_460934064,rsal_460928558,rsal_460931770	hypothetical protein RSSM_06236::hypothetical protein RSSM_00455::hypothetical protein RSSM_04349::hypothetical protein RSSM_01967::hypothetical protein RSSM_01218::hypothetical protein RSSM_05642::hypothetical protein RSSM_03078
rsal_NCIM00064	7	rsal_460931676,rsal_460934601,rsal_460928534,rsal_460930461,rsal_460930064,rsal_460935027,rsal_460928281	transcription initiation factor sigma 70::RNA polymerase, sigma 70 subunit, RpoD subfamily::RNA polymerase sigma factor rpoD::RNA polymerase sigma factor rpoS::RNA polymerase sigma factor RpoD::RNA polymerase sigma-28 subunit SigD/FliA/WhiG::RNA polymerase ECF-type sigma factor
rsal_NCIM00065	7	rsal_460928171,rsal_460928177,rsal_460934085,rsal_460929150,rsal_460933189,rsal_460929405,rsal_460929407	V-type ATP synthase subunit B::h+transporting two sector atpase alpha subunit beta central region::type III secretion system ATPase::transcription termination factor Rho::transcription termination factor Rho::F0F1 ATP synthase subunit beta::F0F1 ATP synthase subunit alpha
rsal_NCIM00066	7	rsal_460929207,rsal_460927504,rsal_460927974,rsal_460933057,rsal_460930195,rsal_460931070,rsal_460933980	putative membrane protein::biopolymer transport ExbB-related protein::TolQ-type transport protein::TolQ-type transport protein::MotA/TolQ/ExbB proton channel::MotA/TolQ/ExbB proton channel::tolQ-type transport protein
rsal_NCIM00067	7	rsal_460931662,rsal_460931959,rsal_460932706,rsal_460933936,rsal_460932004,rsal_460932002,rsal_460927545	membrane-fusion protein::alkaline proteinase secretion protein aprE::alkaline proteinase secretion protein aprE::alkaline protease secretion protein AprE::membrane-fusion protein::peptidase, M50 family::phytochrome sensor protein
rsal_NCIM00068	7	rsal_460934503,rsal_460927649,rsal_460927372,rsal_460928461,rsal_460928790,rsal_460929491,rsal_460928459	metallo-beta-lactamase/rhodanese-like domain-containing protein::rhodanese-like domain-containing protein::metallo-beta-lactamase/rhodanese-like domain-containing protein::metallo-beta-lactamase superfamily protein, partial::Rhodanese domain-containing protein::Rhodanese domain-containing protein::Rhodanese-like protein
rsal_NCIM00069	6	rsal_460931750,rsal_460931751,rsal_460928576,rsal_460928577,rsal_460933647,rsal_460933648	von Willebrand factor type A::BatA aerotolerance operon protein::transporter::von Willebrand factor type A domain-containing protein::BatA aerotolerance operon protein::von Willebrand factor type A
rsal_NCIM00070	6	rsal_460932364,rsal_460927344,rsal_460927343,rsal_460932363,rsal_460928772,rsal_460928773	phosphate ABC transporter inner membrane subunit PstC::phosphate ABC transporter, inner membrane subunit PstC::phosphate ABC transporter, inner membrane subunit PstA::phosphate ABC transporter (permease)::phosphate transport system permease protein PstA::phosphate ABC transporter, permease protein
rsal_NCIM00071	6	rsal_460934268,rsal_460931303,rsal_460927916,rsal_460929457,rsal_460930165,rsal_460930730	Integrase, catalytic core, phage domain protein::integrase/recombinase::Integrase, catalytic core, phage domain protein::site-specific tyrosine recombinase XerD::integrase family protein::tyrosine type site-specific recombinase
rsal_NCIM00072	6	rsal_460929825,rsal_460930476,rsal_460932701,rsal_460934542,rsal_460933858,rsal_460933560	adenylate cyclase regulatory protein::hypothetical protein RSSM_04146::leucine-rich repeat domain protein::leucine-rich repeat-containing protein::receptor protein kinase::adenylate cyclase regulatory protein
rsal_NCIM00073	6	rsal_460931768,rsal_460932618,rsal_460933186,rsal_460929814,rsal_460931681,rsal_460928597	secreted protein containing DUF1598::signal peptide protein::secreted protein containing DUF1598::secreted protein containing DUF1598::type II and III secretion system protein::Type II and III secretion system protein
rsal_NCIM00074	6	rsal_460935535,rsal_460933181,rsal_460928485,rsal_460932267,rsal_460932550,rsal_460931391	helicase protein::SWF/SNF family helicase::helicase, Snf2 family protein::helicase domain-containing protein::SWI/SNF family helicase::helicase, SNF2/RAD54 family
rsal_NCIM00075	6	rsal_460931799,rsal_460930813,rsal_460929308,rsal_460934151,rsal_460930220,rsal_460934000	type IV fimbrial assembly protein PilC::type IV pilin biogenesis protein::general secretion pathway protein F-putative pilus protein::type II secretion system F domain protein::general secretion pathway protein F::type 4 fimbrial assembly protein pilC
rsal_NCIM00076	6	rsal_460935154,rsal_460929604,rsal_460935318,rsal_460929452,rsal_460928987,rsal_460927339	plasma-membrane proton-efflux P-type ATPase::heavy metal translocating P-type ATPase::heavy metal translocating p-type atpase, partial::cadmium translocating P-type ATPase::cation-transporting ATPase, E1-E2 family, partial::heavy metal translocating P-type ATPase
rsal_NCIM00077	6	rsal_460932279,rsal_460934107,rsal_460933100,rsal_460927326,rsal_460931194,rsal_460932654	AhpC/Tsa family protein::bacterioferritin comigratory protein::alkyl hydroperoxide reductase/ Thiol specific antioxidant/ Mal allergen::alkyl hydroperoxide reductase/ Thiol specific antioxidant/ Mal allergen::alkyl hydroperoxide reductase/ Thiol specific antioxidant/ Mal allergen::thioredoxin peroxidase
rsal_NCIM00078	6	rsal_460929465,rsal_460931616,rsal_460929463,rsal_460927582,rsal_460931618,rsal_460927581	transporter::TadE family protein::TadE family protein::transporter::TadE family protein::transporter
rsal_NCIM00079	6	rsal_460931673,rsal_460934623,rsal_460931788,rsal_460932704,rsal_460934463,rsal_460933913	outer membrane efflux protein::outer membrane efflux protein::outer membrane efflux protein::outer membrane efflux protein::outer membrane efflux protein::outer membrane efflux protein
rsal_NCIM00080	6	rsal_460935447,rsal_460933166,rsal_460932863,rsal_460931359,rsal_460927139,rsal_460934855	secreted protein containing DUF1551::signal peptide protein::protein containing DUF1551::protein containing DUF1551::protein containing DUF1551::protein containing DUF1551
rsal_NCIM00081	6	rsal_460931769,rsal_460927410,rsal_460931902,rsal_460931953,rsal_460927961,rsal_460931856	small-conductance mechanosensitive channel::MscS Mechanosensitive ion channel::small conductance mechanosensitive ion channel::potassium efflux protein KefA::potassium efflux system KefA::mechanosensitive ion channel protein MscS
rsal_NCIM00082	6	rsal_460929787,rsal_460930750,rsal_460928562,rsal_460928559,rsal_460934667,rsal_460927258	Pyruvate carboxylase, partial::acetyl-CoA carboxylase biotin carboxylase subunit::pyruvate carboxylase subunit B::biotin/lipoyl attachment domain-containing protein::Biotin/lipoyl attachment domain protein::Pyruvate carboxylase
rsal_NCIM00083	6	rsal_460931708,rsal_460931918,rsal_460932809,rsal_460933020,rsal_460933538,rsal_460934949	undecaprenyl-phosphate galactosephosphotransferase::capsular polysaccharide biosynthesis protein::Cps2E::bacterial sugar transferase::undecaprenyl-phosphate galactosephosphotransferase::Exopolysaccharide biosynthesis polyprenyl glycosylphosphotransferase
rsal_NCIM00084	6	rsal_460929335,rsal_460933176,rsal_460931330,rsal_460935355,rsal_460934254,rsal_460927542	RNA polymerase sigma-70 ECF-like protein::RNA polymerase sigma-70 ECF-like protein::RNA polymerase sigma-70 ECF-like protein::Transcription regulator LuxR::RNA polymerase sigma-70 ECF-like protein::RNA polymerase ECF-type sigma
rsal_NCIM00085	5	rsal_460935130,rsal_460933202,rsal_460930574,rsal_460930247,rsal_460935275	ABC transporter integral membrane protein::macrolide export ATP-binding/permease protein MacB::ABC transporter permease protein::membrane protein containing DUF214, permase predicted::ABC transporter integral membrane protein
rsal_NCIM00086	5	rsal_460927543,rsal_460932708,rsal_460931661,rsal_460931961,rsal_460933937	M50 family peptidase::peptidase, M50 family::peptidase, M50 family::peptidase, M50 family::peptidase, M50 family
rsal_NCIM00087	7	rsal_460933940,rsal_460929079,rsal_460927711,rsal_460927710,rsal_460934730,rsal_460927666,rsal_460931253	Alcohol dehydrogenase zinc-binding domain protein::zinc-containing alcohol dehydrogenase superfamily protein::alcohol dehydrogenase zinc-binding domain-containing protein::alcohol dehydrogenase zinc-binding domain-containing protein::alcohol dehydrogenase zinc-binding domain-containing protein::alcohol dehydrogenase zinc-binding domain-containing protein::zinc-binding alcohol dehydrogenase
rsal_NCIM00088	6	rsal_460931663,rsal_460929633,rsal_460931960,rsal_460932707,rsal_460932005,rsal_460927544	protein HlyD family protein::multidrug efflux pump::multidrug efflux pump::secretion protein HlyD family protein::secretion protein HlyD family protein::signal peptide protein
rsal_NCIM00089	6	rsal_460933164,rsal_460928643,rsal_460935187,rsal_460932866,rsal_460932865,rsal_460934868	Cna B domain-containing protein::Cna B-type::protocadherin Fat-like protein, partial::fibrinogen-binding protein::fibrinogen-binding protein::Collagen-binding surface protein Cna-like, B region domain protein
rsal_NCIM00090	5	rsal_460934340,rsal_460935020,rsal_460932155,rsal_460932867,rsal_460931939	Carbon storage regulator::Carbon storage regulator::Carbon storage regulator::Carbon storage regulator::Carbon storage regulator
rsal_NCIM00091	5	rsal_460928028,rsal_460928906,rsal_460931884,rsal_460932196,rsal_460929899	molybdopterin oxidoreductase, iron sulfur subunit::cyclic nucleotide-binding protein::molybdopterin oxidoreductase, iron-sulfur binding subunit::cyclic nucleotide-binding domain (cNMP-BD) protein::molybdopterin oxidoreductase, iron-sulfur binding subunit
rsal_NCIM00092	5	rsal_460929500,rsal_460934161,rsal_460927262,rsal_460928296,rsal_460933449	GntR family transcriptional regulator::GntR family transcriptional regulator::GntR family transcriptional regulator::GntR family transcriptional regulator::GntR family transcriptional regulator
rsal_NCIM00093	5	rsal_460933954,rsal_460928304,rsal_460931502,rsal_460933128,rsal_460935407	glycosyl hydrolase family 2, sugar binding domain protein::glycosyl hydrolase family 2, sugar binding domain protein::glycosyl hydrolase family 2, sugar binding domain protein::glycoside hydrolase family 2 sugar binding protein, partial::glycosyl hydrolase family 2, sugar binding domain protein
rsal_NCIM00094	5	rsal_460933431,rsal_460932234,rsal_460928244,rsal_460928494,rsal_460933562	Dihydrodipicolinate synthase::dihydrodipicolinate synthetase::N-acetylneuraminate lyase::dihydrodipicolinate synthase::dihydrodipicolinate synthase
rsal_NCIM00095	5	rsal_460928287,rsal_460932156,rsal_460931643,rsal_460934233,rsal_460930729	integrase family protein::phage integrase family protein::integrase family protein::integrase family protein::phage integrase family protein
rsal_NCIM00096	5	rsal_460931597,rsal_460934549,rsal_460930895,rsal_460928787,rsal_460935063	ferredoxin::ferredoxin::signal peptide protein, partial::putative secreted protein::hypothetical protein RSSM_00376, partial
rsal_NCIM00097	5	rsal_460932588,rsal_460931096,rsal_460932067,rsal_460931336,rsal_460928237	ankyrin repeat-containing protein::hypothetical protein RSSM_03607::fibronectin type 3 and ankyrin repeat domain protein 1::ankyrin repeat protein::ankyrin repeat-containing protein
rsal_NCIM00098	5	rsal_460932350,rsal_460930782,rsal_460928650,rsal_460930960,rsal_460927875	sulfate transporter::sulfate transporter family protein::sulfate transporter, SulP family protein, partial::Carbonate dehydratase::Carbonic anhydrase
rsal_NCIM00099	5	rsal_460931493,rsal_460928649,rsal_460928648,rsal_460931496,rsal_460931494	monovalent cation/H+ antiporter subunit D::NADH dehydrogenase subunit M::NADH dehydrogenase subunit F::monovalent cation/H+ antiporter subunit D::monovalent cation/H+ antiporter subunit D
rsal_NCIM00100	5	rsal_460932445,rsal_460932446,rsal_460933258,rsal_460932360,rsal_460928988	UspA domain-containing protein::universal stress protein::universal stress protein::UspA domain protein::universal stress protein
rsal_NCIM00101	5	rsal_460930465,rsal_460933693,rsal_460933878,rsal_460927264,rsal_460929924	aldose 1-epimerase::aldose 1-epimerase::aldose 1-epimerase::Aldose 1-epimerase::Aldose 1-epimerase
rsal_NCIM00102	5	rsal_460935131,rsal_460935415,rsal_460929918,rsal_460931534,rsal_460935464	enterochelin esterase::esterase::hydrolase::gluconolactonase precursor::gluconolactonase (precursor)
rsal_NCIM00103	5	rsal_460935047,rsal_460929695,rsal_460930496,rsal_460933038,rsal_460929314	oxidoreductase, aldo/keto reductase family::oxidoreductase, aldo/keto reductase family::L-galactose dehydrogenase::aldo/keto reductase family oxidoreductase TAS::aldo-keto reductase
rsal_NCIM00104	5	rsal_460933107,rsal_460934664,rsal_460930435,rsal_460929772,rsal_460928337	MarR family transcriptional regulator::MarR family regulatory protein::MarR family transcriptional regulator::MarR family transcriptional regulator::marR-family transcription regulator
rsal_NCIM00105	5	rsal_460933086,rsal_460932695,rsal_460934838,rsal_460933834,rsal_460933083	FAD dependent oxidoreductase::phytoene dehydrogenase::oxidoreductase::phytoene dehydrogenase::Phytoene dehydrogenase
rsal_NCIM00106	5	rsal_460928880,rsal_460932321,rsal_460933888,rsal_460930540,rsal_460933612	xylulose kinase::Rhamnulokinase::L-ribulokinase::rhamnulokinase::Glycerol kinase
rsal_NCIM00107	5	rsal_460927787,rsal_460932929,rsal_460934295,rsal_460932890,rsal_460931832	alpha-glucosidase::alpha-glucosidase::glycoside hydrolase family 97::alpha-glucosidase::alpha-glucosidase
rsal_NCIM00108	5	rsal_460927898,rsal_460931815,rsal_460933023,rsal_460931952,rsal_460932087	perosamine synthetase::DegT/DnrJ/EryC1/StrS aminotransferase::perosamine synthetase::pleiotropic regulatory protein::DegT/DnrJ/EryC1/StrS aminotransferase
rsal_NCIM00109	5	rsal_460933079,rsal_460928108,rsal_460928932,rsal_460930631,rsal_460929460	ribosomal large subunit pseudouridine synthase A::pseudouridine synthase, RluA family::ribosomal large subunit pseudouridine synthase D::ribosomal large subunit pseudouridine synthase D::ribosomal large subunit pseudouridine synthase D
rsal_NCIM00110	5	rsal_460934919,rsal_460928789,rsal_460933392,rsal_460933396,rsal_460932232	ArsR family transcriptional regulator::regulatory protein ArsR::ArsR family transcriptional regulator::regulatory protein ArsR::ArsR family transcriptional regulator
rsal_NCIM00111	5	rsal_460927648,rsal_460934534,rsal_460927554,rsal_460927364,rsal_460930257	secreted protein, putative xanthan lyase::pyridine nucleotide-disulfide oxidoreductase::pyridine nucleotide-disulfide oxidoreductase::pyridine nucleotide-disulfide oxidoreductase::Glucose-inhibited division protein A-related protein
rsal_NCIM00112	5	rsal_460931144,rsal_460930698,rsal_460935079,rsal_460934807,rsal_460927101	large multi-functional protein::large multi-functional protein::multi-domain protein::secreted protein containing DUF1080::multi-domain protein
rsal_NCIM00113	4	rsal_460927799,rsal_460933024,rsal_460933516,rsal_460931842	UDP-N-acetylglucosamine 2-epimerase, partial::UDP-N-acetylglucosamine 2-epimerase::UDP-N-acetylglucosamine 2-epimerase, partial::UDP-N-acetylglucosamine 2-epimerase
rsal_NCIM00114	4	rsal_460927674,rsal_460930773,rsal_460929998,rsal_460934994	site-specific recombinase, phage integrase family protein::integrase-recombinase protein::integrase-recombinase protein::integrase-recombinase protein
rsal_NCIM00115	4	rsal_460932372,rsal_460929229,rsal_460933442,rsal_460934525	periplasmic binding protein/LacI transcriptional regulator::periplasmic sugar-binding protein::ABC transporter periplasmic-binding protein YtfQ::periplasmic binding protein/LacI transcriptional regulator
rsal_NCIM00116	4	rsal_460933040,rsal_460927927,rsal_460929850,rsal_460933643	Peptidylprolyl isomerase::peptidylprolyl isomerase::cyclophilin type peptidylprolyl isomerase::cyclophilin
rsal_NCIM00117	4	rsal_460929287,rsal_460933594,rsal_460928415,rsal_460932037	secreted protein containing DUF1573::secreted protein containing DUF1573::protein containing DUF1573::membrane or secreted protein containing DUF1573
rsal_NCIM00118	4	rsal_460934595,rsal_460930593,rsal_460934593,rsal_460928687	hydroxymyristoyl-(acyl carrier protein) dehydratase::beta-hydroxyacyl-ACP dehydratase::hydroxymyristoyl-(acyl carrier protein) dehydratase::beta-hydroxyacyl-ACP dehydratase, partial
rsal_NCIM00119	4	rsal_460930410,rsal_460929428,rsal_460929247,rsal_460930345	putative membrane protein::signal peptide protein::Tetratricopeptide repeat containing protein::O-antigen ligase-related protein
rsal_NCIM00120	4	rsal_460933874,rsal_460931930,rsal_460933311,rsal_460929864	guanine deaminase::guanine deaminase::CMP/dCMP deaminase zinc-binding protein::cytosine deaminase
rsal_NCIM00121	4	rsal_460928161,rsal_460932650,rsal_460927866,rsal_460929921	lysyl-tRNA synthetase family protein::aspartyl-tRNA synthetase::Lysyl-tRNA synthetase::asparaginyl-tRNA synthetase
rsal_NCIM00122	4	rsal_460930890,rsal_460933932,rsal_460930662,rsal_460930579	3-oxoacyl-[acyl-carrier-protein] synthase III::3-oxoacyl-(acyl-carrier-protein) synthase III::3-oxoacyl-(acyl carrier protein) synthase III::3-Oxoacyl-[acyl-carrier-protein (ACP)] synthase III
rsal_NCIM00123	4	rsal_460931628,rsal_460935211,rsal_460927591,rsal_460933308	transcription accessory protein::Ribosomal protein S1, RNA binding domain protein::polynucleotide phosphorylase/polyadenylase::30S ribosomal protein S1
rsal_NCIM00124	4	rsal_460932827,rsal_460928396,rsal_460932854,rsal_460928303	alpha/beta hydrolase fold protein::haloalkane dehalogenase::alpha/beta hydrolase fold protein::alpha/beta hydrolase fold protein
rsal_NCIM00125	4	rsal_460930062,rsal_460928034,rsal_460927347,rsal_460928593	hypothetical protein RSSM_04474::hypothetical protein RSSM_06042::hypothetical protein RSSM_06658::hypothetical protein RSSM_05616
rsal_NCIM00126	4	rsal_460928821,rsal_460934470,rsal_460929960,rsal_460933681	transposase, IS116/IS110/IS902 family protein::transposase, IS116/IS110/IS902 family protein::transposase IS116/IS110/IS902 family protein::transposase IS116/IS110/IS902 family protein
rsal_NCIM00127	4	rsal_460931101,rsal_460934786,rsal_460934930,rsal_460935543	Excisionase/Xis, DNA-binding domain protein::PTS IIA-like nitrogen-regulatory protein PtsN::PTS IIA-like nitrogen-regulatory protein PtsN::sodium/hydrogen exchanger
rsal_NCIM00128	4	rsal_460930768,rsal_460931102,rsal_460931103,rsal_460931297	Type I restriction-modification system methyltransferase subunit::Type I restriction-modification system methyltransferase subunit::type I restriction-modification system, M subunit::type I site-specific deoxyribonuclease
rsal_NCIM00129	4	rsal_460929255,rsal_460934857,rsal_460929117,rsal_460934592	adenosylmethionine-8-amino-7-oxononanoate transaminase, partial::glutamate-1-semialdehyde aminotransferase::Acetylornithine transaminase::acetylornithine aminotransferase
rsal_NCIM00130	4	rsal_460934098,rsal_460928909,rsal_460929982,rsal_460928995	bacterial type II/III secretion system protein::general secretion pathway protein D (outD)::general secretion pathway protein D::general secretion pathway protein D
rsal_NCIM00131	4	rsal_460935435,rsal_460928155,rsal_460928302,rsal_460932424	Helix-turn-helix, type 11 domain protein::Helix-turn-helix type 11 domain protein::helix-turn-helix type 11 domain-containing protein::transcriptional regulator protein-like protein
rsal_NCIM00132	4	rsal_460932817,rsal_460928796,rsal_460932818,rsal_460928795	cystathionine gamma synthase::Cys/Met metabolism, pyridoxal phosphate-dependent enzyme::cystathionine synthase/lyase::Cys/Met metabolism, pyridoxal phosphate-dependent enzyme
rsal_NCIM00133	4	rsal_460930423,rsal_460934880,rsal_460927971,rsal_460929882	hypothetical protein RSSM_04163::signal peptide protein::hypothetical protein RSSM_06148::hypothetical protein RSSM_04561
rsal_NCIM00134	4	rsal_460930091,rsal_460934221,rsal_460933406,rsal_460934222	MchE protein::MchE protein::efflux transporter RND family, MFP subunit::MchE protein
rsal_NCIM00135	4	rsal_460933886,rsal_460932320,rsal_460931657,rsal_460927967	L-ribulose-5-phosphate 4-epimerase::class II aldolase/adducin family protein::class II aldolase/adducin family protein::class II aldolase/adducin family protein
rsal_NCIM00136	4	rsal_460931475,rsal_460932534,rsal_460934502,rsal_460930396	peptidase M56, BlaR1::tolB protein::tolB protein::TolB protein (Precursor)
rsal_NCIM00137	4	rsal_460929260,rsal_460928193,rsal_460931995,rsal_460929363	Nitrogen regulatory protein PII::Nitrogen regulatory protein PII::nitrogen regulatory protein P-II::Nitrogen regulatory protein PII
rsal_NCIM00138	4	rsal_460934676,rsal_460932539,rsal_460929784,rsal_460932169	membrane protein::membrane protein containing DUF1550::membrane protein containing DUF1550::membrane protein containing DUF1550, partial
rsal_NCIM00139	4	rsal_460930520,rsal_460934945,rsal_460933055,rsal_460932402	TPR repeat-containing protein::TPR repeat-containing protein::tetratricopeptide repeat family protein::repeat-containing protein
rsal_NCIM00140	4	rsal_460928547,rsal_460934507,rsal_460930651,rsal_460932048	hypothetical protein RSSM_05631::secreted protein::secreted protein::hypothetical protein RSSM_02833
rsal_NCIM00141	4	rsal_460931658,rsal_460929014,rsal_460931398,rsal_460928585	L-lactate dehydrogenase::L-lactate dehydrogenase::L-lactate dehydrogenase B chain::malate dehydrogenase, NAD-dependent
rsal_NCIM00142	4	rsal_460931321,rsal_460929690,rsal_460929556,rsal_460932222	protein containing DUF1568::protein containing DUF1568::protein containing DUF1568::protein containing DUF1568
rsal_NCIM00143	4	rsal_460934876,rsal_460934543,rsal_460929977,rsal_460935406	putative secreted protein::putative secreted protein::putative secreted protein::hypothetical protein RSSM_00115
rsal_NCIM00144	4	rsal_460932603,rsal_460933498,rsal_460933315,rsal_460927593	Peptidase S54, rhomboid::Peptidase S54, rhomboid::Peptidase S54, rhomboid::Rhomboid family protein
rsal_NCIM00145	4	rsal_460932552,rsal_460932278,rsal_460932274,rsal_460929065	hypothetical protein RSSM_02476::hypothetical protein RSSM_02633::hypothetical protein RSSM_02629::permease
rsal_NCIM00146	4	rsal_460929429,rsal_460928272,rsal_460927754,rsal_460933535	UDP-glucose/GDP-mannose dehydrogenase::UDP-glucose 6-dehydrogenase::GDP-mannose 6-dehydrogenase::UDP-glucose/GDP-mannose dehydrogenase
rsal_NCIM00147	4	rsal_460930481,rsal_460933489,rsal_460933381,rsal_460929927	RNA polymerase sigma-70 ECF-like protein::RNA polymerase sigma-70 ECF-like protein::RNA polymerase sigma-70 ECF-like protein::RNA polymerase sigma-70 ECF-like protein
rsal_NCIM00148	4	rsal_460934389,rsal_460931155,rsal_460927780,rsal_460929173	Glucosylceramidase domain protein::Glucosylceramidase domain protein::hypothetical protein RSSM_06272, partial::Glucosylceramidase domain protein
rsal_NCIM00149	4	rsal_460932210,rsal_460928782,rsal_460934148,rsal_460928607	repeat-containing protein::caspase domain protein::repeat-containing protein::peptidase C14 caspase catalytic subunit p20
rsal_NCIM00150	4	rsal_460928317,rsal_460928542,rsal_460933787,rsal_460933922	hypothetical protein RSSM_05794::UspA domain protein::UspA domain protein::UspA domain protein
rsal_NCIM00151	4	rsal_460927551,rsal_460927550,rsal_460927549,rsal_460932344	protein containing DUF124::protein containing DUF124::protein containing DUF124::protein containing DUF124
rsal_NCIM00152	4	rsal_460931109,rsal_460931293,rsal_460932385,rsal_460929958	type III restriction protein res subunit::type I site-specific deoxyribonuclease, HsdR family::type III restriction protein res subunit::type III restriction protein, res subunit, partial
rsal_NCIM00153	4	rsal_460927278,rsal_460931201,rsal_460931149,rsal_460931223	hypothetical protein RSSM_06689::secreted protein::hypothetical protein RSSM_03587::putative secreted protein
rsal_NCIM00154	4	rsal_460930920,rsal_460927418,rsal_460927484,rsal_460931565	hypothetical protein RSSM_03737::hypothetical protein RSSM_06579::transposase, mutator type::transposase, mutator type
rsal_NCIM00155	4	rsal_460933815,rsal_460930583,rsal_460933816,rsal_460931418	cytochrome c551 peroxidase::di-heme cytochrome c peroxidase::hypothetical protein RSSM_01398::secreted protein containing DUF1111
rsal_NCIM00156	4	rsal_460930613,rsal_460932317,rsal_460931715,rsal_460933938	protein containing DUF1570::secreted protein containing DUF1570::protein containing DUF1570::protein containing DUF1570
rsal_NCIM00157	4	rsal_460927977,rsal_460934648,rsal_460928220,rsal_460929442	anthranilate synthase component II::bifunctional GMP synthase/glutamine amidotransferase protein::para-aminobenzoate/anthranilate synthase glutamine amidotransferase component II::carbamoyl-phosphate synthase, small subunit
rsal_NCIM00158	4	rsal_460934639,rsal_460934351,rsal_460934452,rsal_460935197	aminotransferase class I and II::aspartate aminotransferase::histidinol phosphate aminotransferase::aspartate aminotransferase
rsal_NCIM00159	4	rsal_460934739,rsal_460928113,rsal_460932452,rsal_460934588	xylose/H+ symporter::General substrate transporter::MFS transporter, SP family, partial::MFS transporter, SP family
rsal_NCIM00160	5	rsal_460934539,rsal_460928050,rsal_460929990,rsal_460927904,rsal_460930405	hypothetical protein RSSM_00810::putative secreted protein::putative secreted protein::putative secreted protein::glycosyl hydrolase (putative secreted protein)
rsal_NCIM00161	4	rsal_460935242,rsal_460929027,rsal_460929126,rsal_460931744	ABC-transporter, membrane spanning component::membrane protein containing DUF214, permase predicted::DevC protein::ABC transporter permease protein
rsal_NCIM00162	3	rsal_460934316,rsal_460930499,rsal_460932325	Bacterial glucose/galactose transporter::L-fucose:H+ symporter permease::l-fucose transporter
rsal_NCIM00163	3	rsal_460933239,rsal_460929986,rsal_460933236	secreted protein::hypothetical protein RSSM_04515::secreted protein
rsal_NCIM00164	3	rsal_460932775,rsal_460929976,rsal_460935321	processing peptidase, partial::zinc protease::processing peptidase
rsal_NCIM00165	3	rsal_460932198,rsal_460932202,rsal_460932201	hypothetical protein RSSM_02691::putative secreted protein::hypothetical protein RSSM_02694
rsal_NCIM00166	3	rsal_460930510,rsal_460932079,rsal_460929679	flagellar basal-body rod protein FlgF, partial::flagellar hook protein FlgE::flagellar basal-body rod protein FlgG
rsal_NCIM00167	3	rsal_460933669,rsal_460928412,rsal_460933486	hypothetical protein RSSM_01518::von Willebrand factor, type A domain protein::hypothetical protein RSSM_01652, partial
rsal_NCIM00168	3	rsal_460929254,rsal_460929620,rsal_460929895	oxidoreductase alpha (molybdopterin) subunit::nitrate reductase catalytic subunit::periplasmic nitrate reductase, large subunit
rsal_NCIM00169	3	rsal_460927689,rsal_460929078,rsal_460928454	multifunctional fatty acid oxidation complex subunit alpha::enoyl-CoA hydratase/isomerase family protein::multifunctional fatty acid oxidation complex subunit alpha
rsal_NCIM00170	3	rsal_460929237,rsal_460929231,rsal_460931340	LacI family transcriptional regulator::transcriptional regulator, LacI family::ribose operon repressor
rsal_NCIM00171	3	rsal_460928037,rsal_460927576,rsal_460931362	modification methylase, HemK family::protein-(glutamine-N5) methyltransferase, release factor-specific::Methyltransferase small domain protein
rsal_NCIM00172	3	rsal_460931615,rsal_460934173,rsal_460932518	DNA gyrase subunit B::DNA topoisomerase IV subunit B::DNA gyrase, B subunit
rsal_NCIM00173	3	rsal_460927902,rsal_460934106,rsal_460930947	molecular chaperone DnaK::molecular chaperone-like protein, partial::heat-shock chaperone protein
rsal_NCIM00174	3	rsal_460933657,rsal_460927074,rsal_460932214	adenylate/guanylate cyclase::adenylate/guanylate cyclase::adenylate/guanylate cyclase
rsal_NCIM00175	3	rsal_460928199,rsal_460932484,rsal_460930266	cytochrome c class I, partial::hypothetical protein RSSM_02483::cytochrome c class I
rsal_NCIM00176	3	rsal_460927894,rsal_460930638,rsal_460928519	protoporphyrinogen IX and coproporphyrinogen III oxidase, partial::protoporphyrinogen IX and coproporphyrinogen III oxidase::protoporphyrinogen IX and coproporphyrinogen III oxidase
rsal_NCIM00177	3	rsal_460931200,rsal_460933232,rsal_460928260	lipolytic enzyme, G-D-S-L::esterase::xylanase
rsal_NCIM00178	3	rsal_460929243,rsal_460932431,rsal_460933122	eight transmembrane protein EpsH::eight transmembrane protein EpsH::Exosortase
rsal_NCIM00179	3	rsal_460929938,rsal_460935106,rsal_460935082	glucokinase::glucokinase::ROK family protein
rsal_NCIM00180	3	rsal_460933230,rsal_460927786,rsal_460934042	sialic acid-specific 9-O-acetylesterase::sialic acid-specific 9-O-acetylesterase::sialic acid-specific 9-O-acetylesterase
rsal_NCIM00181	3	rsal_460932328,rsal_460930958,rsal_460931419	tRNA modification GTPase TrmE::ribosome-associated GTPase EngA::tRNA modification GTPase TrmE
rsal_NCIM00182	3	rsal_460928710,rsal_460933451,rsal_460927073	PfkB family KHG/KDPG family aldolase/carbohydrate kinase::ribokinase-like domain-containing protein::ribokinase-like domain-containing protein
rsal_NCIM00183	3	rsal_460929423,rsal_460932739,rsal_460931704	alpha-L-glutamate ligase, RimK family::RimK domain protein ATP-grasp::alpha-L-glutamate ligase, RimK family
rsal_NCIM00184	3	rsal_460934911,rsal_460933572,rsal_460933519	asparagine synthetase::asparagine synthase (glutamine-hydrolyzing)::asparagine synthase (glutamine-hydrolyzing)
rsal_NCIM00185	3	rsal_460927558,rsal_460929829,rsal_460929818	isoleucyl-tRNA synthetase 2::leucyl-tRNA synthetase::valyl-tRNA synthetase
rsal_NCIM00186	3	rsal_460928038,rsal_460929506,rsal_460927813	peptide chain release factor 1::peptide chain release factor 2::Class I peptide chain release factor domain protein
rsal_NCIM00187	3	rsal_460934842,rsal_460928902,rsal_460927079	transcriptional regulator, GntR family::transcriptional regulator, GntR family::aminotransferase domain-containing GntR family transcriptional regulator
rsal_NCIM00188	3	rsal_460934407,rsal_460933569,rsal_460928611	membrane protein containing Transglutaminase-like domain protein::transglutaminase domain protein::transglutaminase domain protein
rsal_NCIM00189	3	rsal_460934874,rsal_460934540,rsal_460928440	Xylose isomerase-type TIM barrel domain protein::Xylose isomerase domain protein TIM barrel::sugar phosphate isomerase/epimerase
rsal_NCIM00190	3	rsal_460933653,rsal_460928468,rsal_460929909	LmbE family protein::LmbE family protein::LmbE family protein
rsal_NCIM00191	3	rsal_460928007,rsal_460932407,rsal_460933557	serine/threonine-protein kinase::beta-galactosidase::beta-galactosidase
rsal_NCIM00192	3	rsal_460928962,rsal_460928473,rsal_460927489	signal peptide-domain containing protein::signal peptide-domain containing protein::signal peptide-domain containing protein
rsal_NCIM00193	3	rsal_460930868,rsal_460934297,rsal_460935352	hypothetical protein RSSM_03787::hypothetical protein RSSM_00996::secreted protein
rsal_NCIM00194	3	rsal_460930861,rsal_460928226,rsal_460928225	flagellin domain protein::flagellin domain protein::flagellin domain protein
rsal_NCIM00195	3	rsal_460933814,rsal_460935448,rsal_460930926	hypothetical protein RSSM_01396::diacylglycerol kinase catalytic region::diacylglycerol kinase catalytic region
rsal_NCIM00196	3	rsal_460928873,rsal_460928408,rsal_460934804	protein containing DUF1571::protein containing DUF1571::secreted protein containing DUF1571
rsal_NCIM00197	3	rsal_460933170,rsal_460929238,rsal_460931341	sugar:cation symporter family protein::hypothetical protein RSSM_05130::sugar:cation symporter family protein
rsal_NCIM00198	3	rsal_460929097,rsal_460929371,rsal_460931789	preprotein translocase secA subunit::preprotein translocase subunit SecA::preprotein translocase SecA subunit
rsal_NCIM00199	3	rsal_460933316,rsal_460927161,rsal_460930629	inositol monophosphatase family protein::Inositol monophosphatase::inositol-1-monophosphatase
rsal_NCIM00200	3	rsal_460933065,rsal_460927993,rsal_460927049	transcription-repair coupling factor::primosome assembly protein PriA::ATP-dependent DNA helicase RecG
rsal_NCIM00201	3	rsal_460935029,rsal_460931375,rsal_460934402	flagellar biosynthesis protein FlhF::signal recognition particle-docking protein FtsY::signal recognition particle protein
rsal_NCIM00202	3	rsal_460929885,rsal_460929886,rsal_460929889	protein containing DUF403, bacteria::protein containing DUF404, bacteria::hypothetical protein RSSM_04568
rsal_NCIM00203	3	rsal_460933465,rsal_460933466,rsal_460933467	protein containing DUF899, thioredoxin-like protein::DGPFAETKE family protein::YCII-related protein
rsal_NCIM00204	3	rsal_460931283,rsal_460928005,rsal_460933323	DNA repair protein RadC::DNA repair protein RadC::DNA repair protein RadC
rsal_NCIM00205	3	rsal_460933998,rsal_460931866,rsal_460934500	GSP protein::signal peptide protein, partial::NolW domain protein
rsal_NCIM00206	3	rsal_460930416,rsal_460933123,rsal_460929244	hypothetical protein RSSM_04208::hypothetical protein RSSM_01969::TPR domain-containing protein
rsal_NCIM00207	3	rsal_460934071,rsal_460933675,rsal_460928320	cell division protein FtsH::ATPase, AAA family::cell division protein FtsH
rsal_NCIM00208	3	rsal_460927061,rsal_460927232,rsal_460928786	PKD domain containing protein::Carbohydrate binding family 6 domain protein::hypothetical protein RSSM_05457
rsal_NCIM00209	3	rsal_460933720,rsal_460931227,rsal_460927303	transposase::transposase ISFtu1, partial::hypothetical protein RSSM_06669, partial
rsal_NCIM00210	3	rsal_460934668,rsal_460928561,rsal_460930100	propionyl-CoA carboxylase, beta subunit::propionyl-CoA carboxylase, beta subunit::acetyl-CoA carboxylase, carboxyl transferase, beta subunit
rsal_NCIM00211	3	rsal_460930762,rsal_460930196,rsal_460934825	hypothetical protein RSSM_03896, partial::hypothetical protein RSSM_04348::hypothetical protein RSSM_00509
rsal_NCIM00212	3	rsal_460931603,rsal_460928857,rsal_460927837	serine proteinase, subtilase family protein::peptidase domain protein::peptidase domain-containing protein
rsal_NCIM00213	3	rsal_460933662,rsal_460927730,rsal_460932671	polyphosphate kinase 2::Polyphosphate kinase 2, predicted::Polyphosphate kinase 2
rsal_NCIM00214	3	rsal_460930392,rsal_460929554,rsal_460929552	chaperonin GroEL::chaperonin GroEL::chaperonin GroEL
rsal_NCIM00215	3	rsal_460931741,rsal_460935485,rsal_460935498	polysaccharide biosynthesis protein::polysaccharide biosynthesis protein::polysaccharide biosynthesis protein
rsal_NCIM00216	3	rsal_460929884,rsal_460929887,rsal_460928545	transglutaminase domain-containing protein::transglutaminase domain-containing protein::transglutaminase domain-containing protein
rsal_NCIM00217	3	rsal_460930319,rsal_460934061,rsal_460929064	cysteine-rich periplasmic protein omcB::cysteine-rich periplasmic protein omcB::60 kDa outer membrane protein
rsal_NCIM00218	3	rsal_460928211,rsal_460932419,rsal_460934782	magnesium transporter::magnesium transporter::magnesium transporter
rsal_NCIM00219	3	rsal_460929869,rsal_460934700,rsal_460932252	Cardiolipin synthetase 2::cardiolipin synthetase::Cardiolipin synthetase 2
rsal_NCIM00220	3	rsal_460930306,rsal_460931322,rsal_460929034	cysteine synthase A::cysteine synthase A::pyridoxal-5'-phosphate-dependent protein subunit beta
rsal_NCIM00221	3	rsal_460934229,rsal_460932059,rsal_460929844	stage III sporulation protein E::cell division protein FtsK/SpoIIIE::stage III sporulation protein E
rsal_NCIM00222	3	rsal_460927954,rsal_460929920,rsal_460931975	glutamate--tRNA ligase::glutamyl-Q tRNA(Asp) synthetase::glutaminyl-tRNA synthetase
rsal_NCIM00223	3	rsal_460930806,rsal_460934368,rsal_460930830	phosphoglycerate dehydrogenase SerA2- NAD-dependent 2-hydroxyacid dehydrogenase::D-3-phosphoglycerate dehydrogenase::glyoxylate reductase/hydroxypyruvate reductase
rsal_NCIM00224	3	rsal_460934910,rsal_460928359,rsal_460930183	Aspartate/ornithine carbamoyltransferase, carbamoyl-P binding domain protein::ornithine carbamoyltransferase::aspartate carbamoyltransferase catalytic subunit
rsal_NCIM00225	3	rsal_460929386,rsal_460931713,rsal_460932810	lipopolysaccharide biosynthesis protein, partial::lipopolysaccharide biosynthesis protein::lipopolysaccharide biosynthesis protein
rsal_NCIM00226	3	rsal_460934437,rsal_460928948,rsal_460930616	secreted protein::hypothetical protein RSSM_05365::hypothetical protein RSSM_04032
rsal_NCIM00227	3	rsal_460934820,rsal_460934005,rsal_460928665	hypothetical protein RSSM_00570::hypothetical protein RSSM_01159::hypothetical protein RSSM_05557
rsal_NCIM00228	3	rsal_460932225,rsal_460933774,rsal_460932374	Peptidase C14, caspase catalytic domain protein::Peptidase C14, caspase catalytic domain protein::peptidase C14, caspase catalytic subunit p20
rsal_NCIM00229	3	rsal_460929553,rsal_460930391,rsal_460931730	10 kDa chaperonin::Chaperonin Cpn10::GroES chaperonin
rsal_NCIM00230	3	rsal_460930865,rsal_460930976,rsal_460929619	sulfite reductase subunit beta::sulfite reductase::precorrin-3B synthase
rsal_NCIM00231	3	rsal_460933043,rsal_460933082,rsal_460930796	methyltransferase type 12::methyltransferase type 12::type 11 methyltransferase
rsal_NCIM00232	3	rsal_460933789,rsal_460935271,rsal_460932442	dihydroorotate dehydrogenase 2::dihydroorotate oxidase::dihydroorotate dehydrogenase 2
rsal_NCIM00233	3	rsal_460934448,rsal_460933076,rsal_460930755	polyprenyl synthetase::Polyprenyl synthetase::polyprenyl synthetase
rsal_NCIM00234	3	rsal_460933033,rsal_460934965,rsal_460930203	peptidase S9, prolyl oligopeptidase active site domain protein::peptidase S9B dipeptidylpeptidase IV domain protein::peptidase S9B dipeptidylpeptidase IV domain protein
rsal_NCIM00235	3	rsal_460932515,rsal_460933227,rsal_460934422	intracellular protease, PfpI family::intracellular protease, PfpI family::intracellular protease, pfpi family protein
rsal_NCIM00236	3	rsal_460933788,rsal_460929047,rsal_460929046	heat shock protein Hsp20::heat shock protein Hsp20::heat shock protein, HSP20
rsal_NCIM00237	3	rsal_460931901,rsal_460934335,rsal_460930847	RNA polymerase subunit alpha domain protein::RNA polymerase, alpha subunit::DNA-directed RNA polymerase subunit alpha
rsal_NCIM00238	3	rsal_460930680,rsal_460932295,rsal_460932297	ATP-dependent DNA helicase PcrA::ATP-dependent DNA helicase PcrA::ATP-dependent DNA helicase, UvrD/REP family
rsal_NCIM00239	3	rsal_460929113,rsal_460934631,rsal_460929638	integral membrane protein::integral membrane protein::integral membrane protein
rsal_NCIM00240	3	rsal_460935004,rsal_460927167,rsal_460928706	secreted protein containing DUF1680::secreted protein containing DUF1680::protein containing DUF1680
rsal_NCIM00241	3	rsal_460932501,rsal_460929821,rsal_460928469	6-phosphogluconolactonase::glucosamine-6-phosphate deaminase::glucosamine-6-phosphate deaminase-like protein
rsal_NCIM00242	3	rsal_460927345,rsal_460928769,rsal_460932413	Periplasmic phosphate binding protein::Periplasmic phosphate binding protein::phosphate ABC transporter periplasmic phosphate-binding protein
rsal_NCIM00243	3	rsal_460932041,rsal_460934003,rsal_460930108	periplasmic tail-specific proteinase::carboxyl-terminal protease::Peptidase S41A
rsal_NCIM00244	3	rsal_460930142,rsal_460928271,rsal_460927227	glycoside hydrolase family protein, partial::glycoside hydrolase family protein::glycoside hydrolase family protein
rsal_NCIM00245	3	rsal_460928767,rsal_460933069,rsal_460930484	FKBP-type peptidyl-prolyl cis-trans isomerase::Peptidyl-prolyl cis-trans isomerase, FKBP-type domain protein::peptidyl-prolyl cis-trans isomerase, FKBP-type
rsal_NCIM00246	3	rsal_460933439,rsal_460932834,rsal_460933440	monosaccharide-transporting ATPase::monosaccharide-transporting ATPase::sugar ABC transporter permease protein
rsal_NCIM00247	3	rsal_460930231,rsal_460934744,rsal_460928292	FHA domain containing protein::FHA domain containing protein::Forkhead-associated domain protein
rsal_NCIM00248	3	rsal_460931617,rsal_460929464,rsal_460927580	protein containing von Willebrand factor, type A::von Willebrand factor type A::von Willebrand factor type A
rsal_NCIM00249	4	rsal_460934617,rsal_460935011,rsal_460935010,rsal_460935012	oxidoreductase, short chain dehydrogenase/reductase family::short-chain dehydrogenase/reductase SDR::oxidoreductase yajO1::oxidoreductase
rsal_NCIM00250	3	rsal_460931845,rsal_460934853,rsal_460930859	protein containing DUF11::protein containing DUF11::repeat domain protein
rsal_NCIM00251	2	rsal_460928993,rsal_460933102	Sodium/hydrogen exchanger::glutathione-regulated potassium-efflux system protein kefB
rsal_NCIM00252	2	rsal_460932197,rsal_460927090	Respiratory-chain NADH dehydrogenase domain 51 kDa subunit::NADH:ubiquinone oxidoreductase, NADH-binding 51 kD subunit
rsal_NCIM00253	2	rsal_460932992,rsal_460932994	hypothetical protein RSSM_02076::hypothetical protein RSSM_02078
rsal_NCIM00254	2	rsal_460930723,rsal_460932160	hypothetical protein RSSM_03911::hypothetical protein RSSM_02728
rsal_NCIM00255	2	rsal_460930582,rsal_460930835	TIM-barrel protein, nifR3 family::tRNA-dihydrouridine synthase
rsal_NCIM00256	2	rsal_460929450,rsal_460930585	protein serine/threonine phosphatase::protein serine/threonine phosphatase
rsal_NCIM00257	2	rsal_460933973,rsal_460931328	secreted protein::secreted protein
rsal_NCIM00258	2	rsal_460928242,rsal_460927221	hypothetical protein RSSM_05915::hypothetical protein RSSM_06716
rsal_NCIM00259	2	rsal_460930056,rsal_460930057	methylmalonyl-CoA mutase small subunit::methylmalonyl-CoA mutase, large subunit
rsal_NCIM00260	2	rsal_460928140,rsal_460930721	hypothetical protein RSSM_06002::hypothetical protein RSSM_03909
rsal_NCIM00261	2	rsal_460931607,rsal_460927091	glutamate synthase subunit beta::dependent sulfur oxidoreductase C subunit
rsal_NCIM00262	2	rsal_460931761,rsal_460934770	hypothetical protein RSSM_03069::hypothetical protein RSSM_00583
rsal_NCIM00263	2	rsal_460934506,rsal_460934808	metallophosphoesterase::metallophosphoesterase
rsal_NCIM00264	2	rsal_460932849,rsal_460935353	signal peptide protein::signal peptide protein
rsal_NCIM00265	2	rsal_460932157,rsal_460927675	hypothetical protein RSSM_02725::hypothetical protein RSSM_06381
rsal_NCIM00266	2	rsal_460928355,rsal_460929819	2-isopropylmalate synthase::alpha-isopropylmalate/homocitrate synthase family transferase
rsal_NCIM00267	2	rsal_460929053,rsal_460933012	MATE efflux family protein::MATE efflux family protein
rsal_NCIM00268	2	rsal_460927712,rsal_460932106	hypothetical protein RSSM_06332::hypothetical protein RSSM_02810
rsal_NCIM00269	2	rsal_460927405,rsal_460929505	phosphate-selective porin O and P::phosphate-selective porin O and P
rsal_NCIM00270	2	rsal_460931515,rsal_460929801	deoxyribodipyrimidine photolyase::deoxyribodipyrimidine photolyase
rsal_NCIM00271	2	rsal_460933375,rsal_460933103	BLUF domain protein::BLUF domain protein
rsal_NCIM00272	2	rsal_460934370,rsal_460928160	delta-9 acyl-phospholipid desaturase::Stearoyl-CoA 9-desaturase
rsal_NCIM00273	2	rsal_460928915,rsal_460929275	radical SAM enzyme, Cfr family::ribosomal RNA large subunit methyltransferase N
rsal_NCIM00274	2	rsal_460928251,rsal_460928250	hypothetical protein RSSM_05924::putative secreted protein
rsal_NCIM00275	2	rsal_460930094,rsal_460935428	outer membrane efflux protein::outer membrane efflux protein
rsal_NCIM00276	2	rsal_460934117,rsal_460934699	protein containing DUF1254::secreted protein containing DUF1254
rsal_NCIM00277	2	rsal_460928426,rsal_460927848	ApbE-like lipoprotein::ApbE family lipoprotein
rsal_NCIM00278	2	rsal_460933728,rsal_460928951	secreted protein::secreted protein
rsal_NCIM00279	2	rsal_460932113,rsal_460931656	Ethanolamine utilization protein EutN/carboxysome structural protein Ccml::carbon dioxide concentrating mechanism protein CcmL
rsal_NCIM00280	2	rsal_460931315,rsal_460931316	hypothetical protein RSSM_03436::hypothetical protein RSSM_03437
rsal_NCIM00281	2	rsal_460932498,rsal_460935234	secreted protein containing DUF1597::secreted protein containing DUF1597
rsal_NCIM00282	2	rsal_460932861,rsal_460932513	putative secreted protein::hypothetical protein RSSM_02437
rsal_NCIM00283	2	rsal_460929912,rsal_460934056	3-isopropylmalate dehydratase, large subunit::aconitate hydratase 1
rsal_NCIM00284	2	rsal_460929917,rsal_460930536	DNA mismatch repair protein MutS domain-containing protein::DNA mismatch repair protein MutS
rsal_NCIM00285	2	rsal_460929919,rsal_460931605	hydrogen peroxide-inducible gene activator::LysR family transcriptional regulator
rsal_NCIM00286	2	rsal_460932285,rsal_460932282	hypothetical protein RSSM_02640::hypothetical protein RSSM_02637
rsal_NCIM00287	2	rsal_460932329,rsal_460932608	HAD family hydrolase::beta-phosphoglucomutase family hydrolase
rsal_NCIM00288	2	rsal_460928339,rsal_460932353	putative membrane protein::Major facilitator superfamily MFS-1
rsal_NCIM00289	2	rsal_460929131,rsal_460932607	FAD dependent oxidoreductase::tryptophan halogenase
rsal_NCIM00290	2	rsal_460935457,rsal_460929462	putative membrane protein::putative membrane protein
rsal_NCIM00291	2	rsal_460928178,rsal_460933179	hypothetical protein RSSM_05979::decarboxylase family protein
rsal_NCIM00292	2	rsal_460930531,rsal_460931996	ammonium transporter::ammonium transporter
rsal_NCIM00293	2	rsal_460929868,rsal_460927445	ubiquinone biosynthesis protein AarF::ubiquinone biosynthesis protein AarF
rsal_NCIM00294	2	rsal_460932773,rsal_460932073	tRNA-i(6)A37 thiotransferase enzyme MiaB::ribosomal protein S12 methylthiotransferase RimO
rsal_NCIM00295	2	rsal_460934344,rsal_460931242	ATP-dependent helicase HrpB::ATP-dependent RNA helicase hrpA, partial
rsal_NCIM00296	2	rsal_460933000,rsal_460930790	ABC transporter permease protein::polysaccharide ABC transporter permease protein
rsal_NCIM00297	2	rsal_460928496,rsal_460933760	Putative oxygen-independent coproporphyrinogen III oxidase::coproporphyrinogen dehydrogenase
rsal_NCIM00298	2	rsal_460927252,rsal_460934329	membrane protein::membrane protein
rsal_NCIM00299	2	rsal_460927659,rsal_460929693	beta-hexosaminidase::beta-hexosaminidase
rsal_NCIM00300	2	rsal_460934017,rsal_460934018	hypothetical protein RSSM_01171::hypothetical protein RSSM_01172
rsal_NCIM00301	2	rsal_460929550,rsal_460929044	GrpE nucleotide exchange factor::GrpE protein
rsal_NCIM00302	2	rsal_460932365,rsal_460928774	phosphate ABC transporter, periplasmic phosphate-binding protein::phosphate ABC transporter periplasmic phosphate-binding protein
rsal_NCIM00303	2	rsal_460929005,rsal_460931546	UBA/THIF-type NAD/FAD binding fold domain protein::UBA/THIF-type NAD/FAD binding protein
rsal_NCIM00304	2	rsal_460933156,rsal_460927636	Alanine dehydrogenase and pyridine nucleotide transhydrogenase::alanine dehydrogenase/PNT domain protein
rsal_NCIM00305	2	rsal_460932941,rsal_460935366	hypothetical protein RSSM_02092::hypothetical protein RSSM_00130, partial
rsal_NCIM00306	2	rsal_460933545,rsal_460931739	hypothetical protein RSSM_01618::long-chain N-acyl amino acid synthase
rsal_NCIM00307	2	rsal_460935409,rsal_460935404	rhamnogalacturonan acetylesterase::rhamnogalacturonan acetylesterase
rsal_NCIM00308	2	rsal_460935405,rsal_460933893	hypothetical protein RSSM_00114::glycosylhydrolase
rsal_NCIM00309	2	rsal_460928731,rsal_460929147	succinate dehydrogenase or fumarate reductase, flavoprotein subunit::L-aspartate oxidase
rsal_NCIM00310	2	rsal_460931421,rsal_460932021	dihydroxy-acid and 6-phosphogluconate dehydratase::dihydroxy acid dehydratase
rsal_NCIM00311	2	rsal_460927191,rsal_460927192	metallophosphoesterase::metallophosphoesterase
rsal_NCIM00312	2	rsal_460929060,rsal_460931542	Methyltransferase type::ribosomal RNA adenine dimethylase domain-containing protein
rsal_NCIM00313	2	rsal_460928785,rsal_460929066	membrane protein containing Endonuclease/exonuclease/phosphatase domain protein::Endonuclease/exonuclease/phosphatase
rsal_NCIM00314	2	rsal_460930834,rsal_460932019	Pyruvate kinase::pyruvate kinase
rsal_NCIM00315	2	rsal_460935385,rsal_460935382	FeS assembly protein SufD::cysteine desulfurase activator complex subunit SufB
rsal_NCIM00316	2	rsal_460935381,rsal_460932510	ferredoxin FdxC::ferredoxin
rsal_NCIM00317	2	rsal_460928424,rsal_460930361	ABC-3 protein, partial::manganese ABC transporter permease protein
rsal_NCIM00318	2	rsal_460929444,rsal_460934435	cycloartenol synthase-like protein::cycloartenol synthase-like protein
rsal_NCIM00319	2	rsal_460933624,rsal_460932354	FAD-dependent pyridine nucleotide-disulfide oxidoreductase::selenide, water dikinase
rsal_NCIM00320	2	rsal_460931622,rsal_460933995	aminopeptidase::peptidase M28
rsal_NCIM00321	2	rsal_460928688,rsal_460932765	putative secreted protein::putative secreted protein
rsal_NCIM00322	2	rsal_460935372,rsal_460932952	putative secreted protein::putative secreted protein
rsal_NCIM00323	2	rsal_460932434,rsal_460933022	colanic acid biosynthesis glycosyl transferase WcaI::Glycosyl transferase, group 1
rsal_NCIM00324	2	rsal_460935527,rsal_460934929	putative secreted protein::signal peptide protein
rsal_NCIM00325	2	rsal_460930530,rsal_460929332	serine protease HtrA::Protease inhibitor I4, serpin, partial
rsal_NCIM00326	2	rsal_460931501,rsal_460933448	L-rhamnose-proton symporter::RhaT l-rhamnose-proton
rsal_NCIM00327	2	rsal_460934382,rsal_460930966	hypothetical protein RSSM_00924::hypothetical protein RSSM_03730
rsal_NCIM00328	2	rsal_460930892,rsal_460928414	serine/threonine protein phosphatase::serine/threonine protein phosphatase
rsal_NCIM00329	2	rsal_460929324,rsal_460934318	translation elongation factor EF-P::translation elongation factor P
rsal_NCIM00330	2	rsal_460932876,rsal_460930363	amidohydrolase 2::amidohydrolase 2
rsal_NCIM00331	2	rsal_460930767,rsal_460931104	type I restriction-modification system::type I restriction-modification system specificity subunit S
rsal_NCIM00332	2	rsal_460929606,rsal_460927214	phosphate acetyltransferase::phosphate butyryltransferase
rsal_NCIM00333	2	rsal_460930326,rsal_460932619	hypothetical protein RSSM_04301::hypothetical protein RSSM_02387
rsal_NCIM00334	2	rsal_460930164,rsal_460930162	hypothetical protein RSSM_04390::hypothetical protein RSSM_04388
rsal_NCIM00335	2	rsal_460931380,rsal_460934328	hypothetical protein RSSM_03374, partial::hypothetical protein RSSM_00974, partial
rsal_NCIM00336	2	rsal_460935262,rsal_460935263	HflC protein::HflK protein
rsal_NCIM00337	2	rsal_460931174,rsal_460927970	3-isopropylmalate dehydrogenase::3-isopropylmalate dehydrogenase
rsal_NCIM00338	2	rsal_460934790,rsal_460930991	Phosphoenolpyruvate-protein phosphotransferase::pyruvate phosphate dikinase
rsal_NCIM00339	2	rsal_460928257,rsal_460934030	Spore coat protein CotH domain protein::secreted protein containing Spore coat protein CotH domain protein
rsal_NCIM00340	2	rsal_460931563,rsal_460929338	hypothetical protein RSSM_03234::hypothetical protein RSSM_05028
rsal_NCIM00341	2	rsal_460932143,rsal_460930132	fatty acid hydroxylase::fatty acid hydroxylase
rsal_NCIM00342	2	rsal_460932148,rsal_460932147	NHL repeat containing protein::NHL repeat containing protein
rsal_NCIM00343	2	rsal_460930780,rsal_460932211	putative secreted protein::putative secreted protein
rsal_NCIM00344	2	rsal_460929435,rsal_460930776	signal peptide protein::signal peptide protein
rsal_NCIM00345	2	rsal_460929436,rsal_460933062	putative secreted protein::hypothetical protein RSSM_02017
rsal_NCIM00346	2	rsal_460933634,rsal_460932907	polysaccharide export protein::polysaccharide biosynthesis/export protein
rsal_NCIM00347	2	rsal_460934499,rsal_460933637	calmodulin-like membrane associated Ca(2+)-binding protein::signal peptide protein
rsal_NCIM00348	2	rsal_460933146,rsal_460932066	thioesterase superfamily protein::thioesterase superfamily protein
rsal_NCIM00349	2	rsal_460934564,rsal_460933632	peptidase C39, bacteriocin processing::peptidase C39 bacteriocin processing
rsal_NCIM00350	2	rsal_460930752,rsal_460929578	aminopeptidase P::peptidase M24
rsal_NCIM00351	2	rsal_460927842,rsal_460927841	squalene synthase HpnC::squalene synthase HpnD
rsal_NCIM00352	2	rsal_460933524,rsal_460934589	membrane bound O-acyl transferase MBOAT family protein::membrane bound O-acyl transferase MBOAT family protein
rsal_NCIM00353	2	rsal_460933457,rsal_460930882	phosphopyruvate hydratase::phosphopyruvate hydratase
rsal_NCIM00354	2	rsal_460928711,rsal_460933450	KDPG and KHG aldolase::KDPG and KHG aldolase
rsal_NCIM00355	2	rsal_460931721,rsal_460933452	Beta-agarase::Beta-agarase
rsal_NCIM00356	2	rsal_460929121,rsal_460930553	excinuclease ABC, C subunit::excinuclease ABC subunit C
rsal_NCIM00357	2	rsal_460932240,rsal_460933262	protein containing DUF28::protein containing DUF28
rsal_NCIM00358	2	rsal_460931672,rsal_460930675	hypothetical protein RSSM_03131::putative secreted protein
rsal_NCIM00359	2	rsal_460930089,rsal_460930549	signal peptide protein::signal peptide protein
rsal_NCIM00360	2	rsal_460930085,rsal_460927355	Integrase, catalytic core, phage domain protein::Integrase, catalytic core, phage domain protein
rsal_NCIM00361	2	rsal_460928656,rsal_460934773	sodium extrusion ABC transporter,permease protein::sodium extrusion ABC transporter,permease protein
rsal_NCIM00362	2	rsal_460927335,rsal_460928400	hypothetical protein RSSM_06646::ankyrin repeat protein
rsal_NCIM00363	2	rsal_460932248,rsal_460935491	DNA polymerase family X protein, partial::phosphotransferase domain-containing protein
rsal_NCIM00364	2	rsal_460929643,rsal_460931511	alpha-amylase, amylosucrase::glycosidase
rsal_NCIM00365	2	rsal_460929641,rsal_460929640	hemolysin protein::CBS domain protein
rsal_NCIM00366	2	rsal_460930979,rsal_460933280	phosphate starvation-induced protein::PhoH family protein
rsal_NCIM00367	2	rsal_460929354,rsal_460928776	putative secreted protein::hypothetical protein RSSM_05499
rsal_NCIM00368	2	rsal_460933868,rsal_460933194	anthranilate synthase component I::para-aminobenzoate synthase subunit I
rsal_NCIM00369	2	rsal_460935489,rsal_460930749	hypothetical protein RSSM_00036::hypothetical protein RSSM_03883
rsal_NCIM00370	2	rsal_460930987,rsal_460933243	nonspecific acid phosphatase precursor::nonspecific acid phosphatase precursor
rsal_NCIM00371	2	rsal_460934188,rsal_460928495	protein disulfide-isomerase::protein disulfide-isomerase
rsal_NCIM00372	2	rsal_460928411,rsal_460934512	ADP-ribosylation factor-directed GTPase activating protein isoform b::ADP-ribosylation factor-directed GTPase activating protein isoform b-like protein
rsal_NCIM00373	2	rsal_460932629,rsal_460934881	peptidase A24A domain protein::peptidase A24A domain protein
rsal_NCIM00374	2	rsal_460931588,rsal_460935155	phosphoglycerate mutase::phosphoglycerate mutase family protein
rsal_NCIM00375	2	rsal_460932830,rsal_460932284	peroxidase-related enzyme::peroxidase-related enzyme
rsal_NCIM00376	2	rsal_460931837,rsal_460928056	HxlR family transcriptional regulator::Helix-turn-helix, HxlR type domain protein
rsal_NCIM00377	2	rsal_460928168,rsal_460929747	mu-protocadherin-putative cell-suface protein::mu-protocadherin-putative cell-suface protein
rsal_NCIM00378	2	rsal_460931097,rsal_460929742	protein containing DUF1572::hypothetical protein RSSM_04700
rsal_NCIM00379	2	rsal_460931633,rsal_460933618	glycine cleavage system H protein::Glycine cleavage H-protein
rsal_NCIM00380	2	rsal_460929560,rsal_460931460	formamidopyrimidine-DNA glycosylase::formamidopyrimidine-DNA glycolase
rsal_NCIM00381	2	rsal_460927829,rsal_460927828	Peptidase S14, ClpP::ATP-dependent Clp protease, proteolytic subunit ClpP
rsal_NCIM00382	2	rsal_460933104,rsal_460927824	Protein-L-isoaspartate(D-aspartate) O-methyltransferase::protein-L-isoaspartate O-methyltransferase
rsal_NCIM00383	2	rsal_460934089,rsal_460931625	UDP-3-O-(R-3-hydroxymyristoyl)-glucosamine N-acyltransferase::acyl-(acyl-carrier-protein)--UDP-N-acetylglucosamine O-acyltransferase
rsal_NCIM00384	2	rsal_460929545,rsal_460930401	deoxyribonuclease I precursor (DNase I)::deoxyribonuclease gamma
rsal_NCIM00385	2	rsal_460933037,rsal_460928451	3-dehydroquinate synthase::3-dehydroquinate synthase
rsal_NCIM00386	2	rsal_460927959,rsal_460931857	hypothetical protein RSSM_06136::stress response RCI peptide
rsal_NCIM00387	2	rsal_460927626,rsal_460927958	hypothetical protein RSSM_06434::hypothetical protein RSSM_06135
rsal_NCIM00388	2	rsal_460929978,rsal_460928599	Rieske::Rieske (2Fe-2S) domain-containing protein
rsal_NCIM00389	2	rsal_460928551,rsal_460928980	Na+/Ca+ antiporter, CaCA family::K+-dependent Na+/Ca+ exchanger-like protein
rsal_NCIM00390	2	rsal_460930348,rsal_460930355	Capsular polysaccharide biosynthesis protein capD::UDP-glucose 4-epimerase, partial
rsal_NCIM00391	2	rsal_460929683,rsal_460934877	putative membrane protein::putative membrane protein
rsal_NCIM00392	2	rsal_460929992,rsal_460932366	response regulator receiver modulated FAD- dependent pyridine nucleotide-disulfide oxidoreductase::thioredoxin-disulfide reductase
rsal_NCIM00393	2	rsal_460930961,rsal_460927474	putative secreted protein::signal peptide protein
rsal_NCIM00394	2	rsal_460931800,rsal_460930034	23S rRNA-associated protein::23S rRNA-associated protein
rsal_NCIM00395	2	rsal_460929751,rsal_460929872	putative membrane protein::inner membrane family protein
rsal_NCIM00396	2	rsal_460930545,rsal_460932916	transmembrane prediction::transmembrane prediction
rsal_NCIM00397	2	rsal_460929955,rsal_460934275	hypothetical protein RSSM_04545::hypothetical protein RSSM_01014
rsal_NCIM00398	2	rsal_460928483,rsal_460931926	ATPase with chaperone activity::ATPase with chaperone activity
rsal_NCIM00399	2	rsal_460933400,rsal_460933401	putative secreted protein::putative secreted protein
rsal_NCIM00400	2	rsal_460934182,rsal_460933414	hemoglobin::oxidoreductase FAD/NAD(P)-binding domain protein
rsal_NCIM00401	2	rsal_460934695,rsal_460929610	putative secreted protein::putative secreted protein
rsal_NCIM00402	2	rsal_460928409,rsal_460930215	DNA polymerase III alpha subunit::DNA polymerase III subunit alpha
rsal_NCIM00403	2	rsal_460927360,rsal_460934323	replicative DNA helicase::replicative DNA helicase
rsal_NCIM00404	2	rsal_460927650,rsal_460927629	amino acid permease-associated region::amino acid permease-associated region
rsal_NCIM00405	2	rsal_460930770,rsal_460934996	hypothetical protein RSSM_03800::Prophage CP4-57 regulatory
rsal_NCIM00406	2	rsal_460933105,rsal_460934518	metallo-beta-lactamase superfamily protein::metallo-beta-lactamase superfamily protein
rsal_NCIM00407	2	rsal_460934861,rsal_460932741	NUDIX hydrolase, core domain protein::hydrolase, NUDIX family
rsal_NCIM00408	2	rsal_460932509,rsal_460929793	SAM-dependent methyltransferase::RNA methylase
rsal_NCIM00409	2	rsal_460934339,rsal_460931818	FAD-linked oxidase domain-containing protein::FAD linked oxidase domain-containing protein
rsal_NCIM00410	2	rsal_460929112,rsal_460927612	2-dehydropantoate 2-reductase::2-dehydropantoate 2-reductase
rsal_NCIM00411	2	rsal_460929546,rsal_460927383	dihydrolipoyllysine-residue succinyltransferase::pyruvate dehydrogenase, E2 component, dihydrolipoamide acetyltransferase
rsal_NCIM00412	2	rsal_460933071,rsal_460929551	heat shock protein DnaJ domain-containing protein::Chaperone protein dnaJ
rsal_NCIM00413	2	rsal_460928940,rsal_460929540	hypothetical protein RSSM_05357::platelet-activating factor acetylhydrolase plasma/intracellular isoform II
rsal_NCIM00414	2	rsal_460932678,rsal_460928505	Aquaporin::MIP family channel protein
rsal_NCIM00415	2	rsal_460932676,rsal_460928032	binding-protein-dependent transport system inner membrane component::nitrate ABC transporter permease protein
rsal_NCIM00416	2	rsal_460931687,rsal_460933099	hypothetical protein RSSM_03079::putative secreted protein
rsal_NCIM00417	2	rsal_460934267,rsal_460927915	hypothetical protein RSSM_01015::hypothetical protein RSSM_06177
rsal_NCIM00418	2	rsal_460930261,rsal_460928704	Glycoside hydrolase family 42 domain protein::beta-galactosidase
rsal_NCIM00419	2	rsal_460934174,rsal_460932688	DNA gyrase subunit A::DNA gyrase subunit A
rsal_NCIM00420	2	rsal_460929583,rsal_460934683	Nodulation efficiency, NfeD::Nodulation efficiency, NfeD
rsal_NCIM00421	2	rsal_460932675,rsal_460928033	NLPA lipoprotein::nitrate-binding proteint
rsal_NCIM00422	2	rsal_460929248,rsal_460932520	SD repeat-containing protein::SD repeat-containing protein
rsal_NCIM00423	2	rsal_460930784,rsal_460933776	transcriptional regulator, Crp/Fnr family::Crp/Fnr family transcriptional regulator
rsal_NCIM00424	2	rsal_460932950,rsal_460932231	glyceraldehyde-3-phosphate dehydrogenase, type I::glyceraldehyde-3-phosphate dehydrogenase, type I
rsal_NCIM00425	2	rsal_460933417,rsal_460928001	SOUL heme-binding protein::SOUL heme-binding protein
rsal_NCIM00426	2	rsal_460934032,rsal_460934307	PEP-CTERM bacterial domain protein::PEP-CTERM bacterial domain protein
rsal_NCIM00427	2	rsal_460933531,rsal_460935036	UDP-N-acetylmuramate dehydrogenase::UDP-N-acetylenolpyruvoylglucosamine reductase
rsal_NCIM00428	2	rsal_460932112,rsal_460929605	acetate kinase::acetate kinase
rsal_NCIM00429	2	rsal_460935334,rsal_460927114	3-deoxy-8-phosphooctulonate synthase::3-deoxy-7-phosphoheptulonate synthase
rsal_NCIM00430	2	rsal_460932111,rsal_460932110	Bacterial microcompartments protein domain protein::ethanolamine utilization protein EutM
rsal_NCIM00431	2	rsal_460934293,rsal_460927609	pyrophosphate--fructose-6-phosphate 1-phosphotransferase::6-phosphate 1-phosphotransferase
rsal_NCIM00432	2	rsal_460932203,rsal_460932020	LVIVD repeat-containing protein::cytochrome c family protein
rsal_NCIM00433	2	rsal_460927745,rsal_460930956	uracil-DNA glycosylase superfamily protein::phage SPO1 DNA polymerase-related protein
rsal_NCIM00434	2	rsal_460933577,rsal_460932061	hypothetical protein RSSM_01650::hypothetical protein RSSM_02765
rsal_NCIM00435	2	rsal_460928520,rsal_460932847	putative secreted protein::hypothetical protein RSSM_02166
rsal_NCIM00436	2	rsal_460931944,rsal_460927903	class III stress response-like ATPase::protein disaggregation chaperone
rsal_NCIM00437	2	rsal_460927826,rsal_460930945	exopolyphosphatase::phosphatase, Ppx/GppA family protein
rsal_NCIM00438	2	rsal_460928608,rsal_460933283	hemolysin::hemolysin protein
rsal_NCIM00439	2	rsal_460935500,rsal_460934324	chromosomal replication initiator protein dnaA::chromosomal replication initiator protein dnaA
rsal_NCIM00440	2	rsal_460934594,rsal_460930839	acyl carrier protein::Acyl carrier protein (ACP)
rsal_NCIM00441	2	rsal_460930232,rsal_460930233	secreted protein::hypothetical protein RSSM_04331
rsal_NCIM00442	2	rsal_460928167,rsal_460929748	putative secreted protein::putative secreted protein
rsal_NCIM00443	2	rsal_460935484,rsal_460935499	putative secreted protein::hypothetical protein RSSM_00046
rsal_NCIM00444	2	rsal_460932352,rsal_460929854	lipoprotein::lipoprotein
rsal_NCIM00445	2	rsal_460934914,rsal_460934446	putative membrane protein::putative membrane protein
rsal_NCIM00446	2	rsal_460931883,rsal_460929900	molybdopterin oxidoreductase membrane subunit::polysulfide reductase, NrfD
rsal_NCIM00447	2	rsal_460934845,rsal_460928831	glycine oxidase ThiO::D-amino acid dehydrogenase small subunit
rsal_NCIM00448	2	rsal_460930069,rsal_460931877	cytochrome c oxidase, subunit II::cytochrome c oxidase, subunit II
rsal_NCIM00449	2	rsal_460928978,rsal_460929705	YTV domain-containing protein::YTV domain protein
rsal_NCIM00450	2	rsal_460930757,rsal_460934024	radical SAM domain-containing protein::Radical SAM domain-containing protein
rsal_NCIM00451	2	rsal_460927756,rsal_460927758	methyltransferase type 11::methyltransferase type 11
rsal_NCIM00452	2	rsal_460929006,rsal_460933252	hypothetical protein RSSM_05308::hypothetical protein RSSM_01881
rsal_NCIM00453	2	rsal_460929490,rsal_460930944	amidohydrolase::carbon-nitrogen hydrolase family protein
rsal_NCIM00454	2	rsal_460933616,rsal_460933435	signal peptide protein::hypothetical protein RSSM_01687
rsal_NCIM00455	2	rsal_460930533,rsal_460932806	Glycosyl transferase WecB/TagA/CpsF::Glycosyl transferase, WecB/TagA/CpsF family
rsal_NCIM00456	2	rsal_460928051,rsal_460930181	Dihydroorotase multifunctional complex type::dihydroorotase, multifunctional complex type
rsal_NCIM00457	2	rsal_460931173,rsal_460933279	phosphatidate cytidylyltransferase::phosphatidate cytidylyltransferase
rsal_NCIM00458	2	rsal_460930084,rsal_460927357	hypothetical protein RSSM_04432::hypothetical protein RSSM_06629
rsal_NCIM00459	2	rsal_460928064,rsal_460934833	Ribose/galactose isomerase::ribose-5-phosphate isomerase B
rsal_NCIM00460	2	rsal_460934836,rsal_460934403	hypothetical protein RSSM_00520::hypothetical protein RSSM_00901
rsal_NCIM00461	2	rsal_460932154,rsal_460929266	stationary phase survival protein SurE::Survival protein SurE-like phosphatase/nucleotidase
rsal_NCIM00462	2	rsal_460928111,rsal_460934942	secreted protein::secreted protein
rsal_NCIM00463	2	rsal_460934491,rsal_460927304	radical SAM/B12 binding domain-containing protein::radical SAM domain-containing protein
rsal_NCIM00464	2	rsal_460929715,rsal_460929716	sodium/calcium exchanger membrane region::sodium/calcium exchanger membrane region
rsal_NCIM00465	2	rsal_460932793,rsal_460931221	von Willebrand factor, type A domain protein, partial::von Willebrand factor, type A domain protein
rsal_NCIM00466	2	rsal_460931514,rsal_460929292	secreted protein::secreted protein
rsal_NCIM00467	2	rsal_460934298,rsal_460928280	DNA binding domain-containing protein, excisionase family::DNA binding domain-containing protein, excisionase family
rsal_NCIM00468	2	rsal_460932833,rsal_460929137	DNA topoisomerase III::DNA topoisomerase I
rsal_NCIM00469	2	rsal_460933685,rsal_460931363	endo-polygalacturonase::endo-polygalacturonase
rsal_NCIM00470	2	rsal_460932948,rsal_460928663	Obg family GTPase CgtA::translation-associated GTPase
rsal_NCIM00471	2	rsal_460929185,rsal_460930620	signal peptide-containing protein::signal peptide-containing protein
rsal_NCIM00472	2	rsal_460930252,rsal_460931532	hypothetical protein RSSM_04315::hypothetical protein RSSM_03247
rsal_NCIM00473	2	rsal_460928721,rsal_460928261	type 12 methyltransferase::methyltransferase type 12
rsal_NCIM00474	2	rsal_460930070,rsal_460931876	cytochrome c oxidase, subunit I::cytochrome C oxidase subunit I
rsal_NCIM00475	2	rsal_460930670,rsal_460935456	Flp/Fap pilin component::Flp/Fap pilin component
rsal_NCIM00476	2	rsal_460930603,rsal_460930677	hypothetical protein RSSM_04019::putative secreted protein
rsal_NCIM00477	2	rsal_460934793,rsal_460927337	Choloylglycine hydrolase::choloylglycine hydrolase
rsal_NCIM00478	2	rsal_460931062,rsal_460931244	hypothetical protein RSSM_03642::hypothetical protein RSSM_03510
rsal_NCIM00479	2	rsal_460932514,rsal_460927041	von Willebrand factor A::hypothetical protein RSSM_06833
rsal_NCIM00480	2	rsal_460932416,rsal_460932737	NUDIX hydrolase::hydrolase, NUDIX
rsal_NCIM00481	2	rsal_460928316,rsal_460931674	hypothetical protein RSSM_05793::hypothetical protein RSSM_03133
rsal_NCIM00482	2	rsal_460927381,rsal_460928323	hypothetical protein RSSM_06582::putative secreted protein
rsal_NCIM00483	2	rsal_460933253,rsal_460932259	potassium channel protein::potassium channel protein
rsal_NCIM00484	2	rsal_460934212,rsal_460929580	Carbohydrate/purine kinase domain protein::ribokinase-like domain-containing protein
rsal_NCIM00485	2	rsal_460933819,rsal_460929037	membrane protein containing DUF421::membrane protein containing DUF421
rsal_NCIM00486	2	rsal_460929038,rsal_460932604	Xylose isomerase domain-containing protein TIM barrel::Xylose isomerase domain protein TIM barrel
rsal_NCIM00487	2	rsal_460928427,rsal_460932909	Na(+)-translocating NADH-quinone reductase subunit F::ferredoxin
rsal_NCIM00488	2	rsal_460932260,rsal_460931506	1-(5-phosphoribosyl)-5-((5-phosphoribosylamino)methylideneamino) imidazole-4-carboxamide isomerase::imidazoleglycerol phosphate synthase, cyclase subunit
rsal_NCIM00489	2	rsal_460929109,rsal_460929114	GH3 auxin-responsive promoter family protein::GH3 auxin-responsive promoter family protein
rsal_NCIM00490	2	rsal_460929451,rsal_460935083	peptidase T-like protein::peptidase T
rsal_NCIM00491	2	rsal_460930951,rsal_460929563	GreA/GreB family elongation factor::transcription elongation factor greA
rsal_NCIM00492	2	rsal_460928546,rsal_460930637	Xenobiotic reductase A::NADH:flavin oxidoreductase/NADH oxidase
rsal_NCIM00493	2	rsal_460929323,rsal_460934313	hypothetical protein RSSM_05064::hypothetical protein RSSM_00977
rsal_NCIM00494	2	rsal_460929218,rsal_460931280	transposase IS4 family::Transposase, IS4 family protein
rsal_NCIM00495	2	rsal_460928132,rsal_460931259	methyltransferase type 11::type 11 methyltransferase
rsal_NCIM00496	2	rsal_460933575,rsal_460935190	Thiol-disulfide oxidoreductase::redoxin domain-containing protein
rsal_NCIM00497	2	rsal_460928869,rsal_460931414	purine nucleoside phosphorylase I, inosine and guanosine-specific::Inosine guanosine and xanthosine phosphorylase
rsal_NCIM00498	2	rsal_460930667,rsal_460931706	peptide methionine sulfoxide reductase::peptide methionine sulfoxide reductase
rsal_NCIM00499	2	rsal_460934626,rsal_460931043	hypothetical protein RSSM_00729, partial::hypothetical protein RSSM_03647, partial
rsal_NCIM00500	2	rsal_460927391,rsal_460928945	putative secreted protein::secreted protein
rsal_NCIM00501	2	rsal_460931298,rsal_460931442	XRE family transcriptional regulator::transcriptional regulator
rsal_NCIM00502	2	rsal_460928523,rsal_460927644	ADP-glucose pyrophosphorylase small subunit::Glucose-1-phosphate adenylyltransferase
rsal_NCIM00503	2	rsal_460929026,rsal_460928638	gluconate permease::Gluconate transporter
rsal_NCIM00504	2	rsal_460927197,rsal_460927703	zinc carboxypeptidase family protein::zinc carboxypeptidase family protein
rsal_NCIM00505	2	rsal_460933205,rsal_460931887	hypothetical protein RSSM_01921::hypothetical protein RSSM_02970
rsal_NCIM00506	2	rsal_460932964,rsal_460931536	peptide methionine sulfoxide reductase::peptide methionine sulfoxide reductase
rsal_NCIM00507	2	rsal_460928957,rsal_460929165	hypothetical protein RSSM_05327::hypothetical protein RSSM_05166
rsal_NCIM00508	2	rsal_460929110,rsal_460933875	lysophospholipase::lysophospholipase
rsal_NCIM00509	2	rsal_460929116,rsal_460927611	hypothetical protein RSSM_05202::hypothetical protein RSSM_06419
rsal_NCIM00510	2	rsal_460932759,rsal_460928012	extracellular nuclease::extracellular nuclease
rsal_NCIM00511	2	rsal_460929249,rsal_460932758	5-nucleotidase lipoprotein e(P4)::acid phosphatase
rsal_NCIM00512	2	rsal_460929843,rsal_460929591	hypothetical protein RSSM_04679::hypothetical protein RSSM_04875
rsal_NCIM00513	2	rsal_460933136,rsal_460934364	Cap5J protein-putative transmembrane protein::Cap5J protein- transmembrane protein
rsal_NCIM00514	2	rsal_460928989,rsal_460928881	Transport-associated domain protein::Transport-associated domain protein
rsal_NCIM00515	2	rsal_460933377,rsal_460934691	hypothetical protein RSSM_01731::CheC domain-containing protein
rsal_NCIM00516	2	rsal_460927896,rsal_460935465	radical SAM domain-containing protein::molybdenum cofactor biosynthesis protein A
rsal_NCIM00517	2	rsal_460931084,rsal_460930738	ISPsy6, transposase::transposase, IS4 family protein
rsal_NCIM00518	2	rsal_460930726,rsal_460929672	DNA polymerase I::DNA polymerase I
rsal_NCIM00519	3	rsal_460929377,rsal_460929181,rsal_460928875	RNA polymerase ECF-type sigma factor::RNA polymerase ECF-type sigma factor::hypothetical protein RSSM_05414
rsal_NCIM00520	3	rsal_460927944,rsal_460932523,rsal_460928063	DNA polymerase III, gamma and tau subunit::replication-associated recombination protein A::DNA polymerase III, tau/gamma subunit
rsal_NCIM00521	3	rsal_460933370,rsal_460933802,rsal_460934116	methyl-accepting chemotaxis transducer/sensory box protein::PAS/PAC sensor hybrid histidine kinase::pas sensor protein
rsal_NCIM00522	3	rsal_460933969,rsal_460927132,rsal_460927492	hypothetical protein RSSM_01277::hypothetical protein RSSM_06790::hypothetical protein RSSM_06520
rsal_NCIM00523	3	rsal_460934858,rsal_460931405,rsal_460927873	response regulator::response regulator::PAS protein
rsal_NCIM00524	3	rsal_460933004,rsal_460931847,rsal_460934305	extracellular nuclease, partial::Na-Ca exchanger/integrin-beta4::Endonuclease/exonuclease/phosphatase domain protein, partial
rsal_NCIM00525	2	rsal_460930059,rsal_460931012	hexapeptide transferase family protein::ferripyochelin-binding protein
rsal_NCIM00526	2	rsal_460927271,rsal_460930649	putative secreted protein::putative secreted protein
rsal_NCIM00527	2	rsal_460934300,rsal_460932125	chemotaxis protein histidine kinase CheA, partial::protein containing ATP-binding region, ATPase-like protein
rsal_NCIM00528	2	rsal_460934867,rsal_460932877	repeat-containing protein::repeat-containing protein
rsal_NCIM00529	2	rsal_460931218,rsal_460935483	glycosyl transferase family 4::glycosyl transferase, family 4, conserved region-containing protein
rsal_NCIM00530	2	rsal_460934289,rsal_460933373	MCP methyltransferase/methylesterase, CheR/CheB with PAS/PAC sensor, partial::protein-glutamate O-methyltransferase

## Sheet: rbal
family accession	family size	gene accession (IMG Gene ID or NCBI GI)	function
rbal_NCIM00001	106	rbal_637433107,rbal_637433106,rbal_637436478,rbal_637439854,rbal_637435890,rbal_637434178,rbal_637434473,rbal_637433375,rbal_637433775,rbal_637433402,rbal_637435975,rbal_637435976,rbal_637433401,rbal_637436718,rbal_637440307,rbal_637435666,rbal_637435667,rbal_637435709,rbal_637435176,rbal_637438292,rbal_637435571,rbal_637433366,rbal_637433365,rbal_637434262,rbal_637437248,rbal_637433369,rbal_6374…	mucin-desulfating sulfatase (N-acetylglucosamine-6-sulfatase)::N-acetylgalactosamine-4-sulfatase precursor::choline sulfatase::arylsulfatase A precursor::arylsulphatase A::iduronate-2-sulfatase::heparan N-sulfatase::sulfatase 1 precursor::N-acetylgalactosamine 6-sulfate sulfatase GALNS::arylsulfatase::probable sulfatase atsG::heparan N-sulfatase::N-acetylgalactosamine 6-sulfate sulfatase (GALNS):…
rbal_NCIM00002	74	rbal_637438065,rbal_637436105,rbal_637436632,rbal_637439135,rbal_637433464,rbal_637437087,rbal_637440340,rbal_637438702,rbal_637438703,rbal_637437972,rbal_637435856,rbal_637435606,rbal_637433686,rbal_637437605,rbal_637437607,rbal_637438280,rbal_637433809,rbal_637437507,rbal_637436861,rbal_637436735,rbal_637437327,rbal_637435526,rbal_637437782,rbal_637433065,rbal_637438878,rbal_637439164,rbal_6374…	hypothetical protein-signal peptide and transmembrane prediction::hypothetical protein-signal peptide and transmembrane prediction::hypothetical protein-signal peptide and transmembrane prediction::hypothetical protein-transmembrane region and signal peptide prediction::hypothetical protein-signal peptide and transmembrane prediction::hypothetical protein-signal peptide and transmembrane predicti…
rbal_NCIM00003	57	rbal_637434128,rbal_637433987,rbal_637439653,rbal_637439111,rbal_637434207,rbal_637433988,rbal_637435820,rbal_637436392,rbal_637438748,rbal_637435139,rbal_637440366,rbal_637438425,rbal_637440065,rbal_637437673,rbal_637437664,rbal_637433985,rbal_637434535,rbal_637435300,rbal_637436142,rbal_637435222,rbal_637437803,rbal_637437468,rbal_637434763,rbal_637438658,rbal_637436302,rbal_637433234,rbal_6374…	probable serine/threonine-protein kinase pknH::serine/threonine protein kinase::probable serine/threonine-protein kinase pknB::probable serine/threonine protein kinase::probable serine/threonine-protein kinase::serine/threonine-protein kinase::probable serine/threonine-protein kinase pknB::serine/threonine protein kinase::probable serine/threonine protein kinase::serine/threonine protein kinase::…
rbal_NCIM00004	46	rbal_637439503,rbal_637440282,rbal_637439464,rbal_637438256,rbal_637435803,rbal_637438250,rbal_637438749,rbal_637434967,rbal_637434960,rbal_637437936,rbal_637439134,rbal_637439217,rbal_637439071,rbal_637438742,rbal_637434825,rbal_637435651,rbal_637439855,rbal_637435652,rbal_637437119,rbal_637438831,rbal_637434471,rbal_637435081,rbal_637435501,rbal_637433080,rbal_637433786,rbal_637434373,rbal_6374…	sensor kinase homolog::sensory transduction histidine kinase::sensory transduction histidine kinase::probable two-component sensor histidine kinase VicK::osmolarity sensor protein envZ::signal-transducing histidine kinase::sensory transduction histidine kinase-possibly sensor/response regulator hybrid::sensor protein atoS::probable sensor protein fixL::probable sensory transduction histidine kina…
rbal_NCIM00005	54	rbal_637438278,rbal_637433656,rbal_637438069,rbal_637438561,rbal_637438251,rbal_637435381,rbal_637436927,rbal_637435042,rbal_637437700,rbal_637439130,rbal_637437487,rbal_637439920,rbal_637433805,rbal_637433146,rbal_637435895,rbal_637433584,rbal_637437030,rbal_637436876,rbal_637437016,rbal_637433701,rbal_637438671,rbal_637435716,rbal_637436495,rbal_637436149,rbal_637437566,rbal_637440156,rbal_6374…	ABC-type transport protein::ABC-type multidrug transport system, ATPase component::hypothetical ABC transporter ATP-binding protein ybiT::probable ABC-type transporter ATP-binding protein::ABC transporter (ATP-binding protein) homolog ygaD::ABC transporter, ATP-binding protein::ABC transporter, ATP-binding protein::ATP-binding subunit of ABC transporter::ABC transporter::ABC transporter, ATP-bind…
rbal_NCIM00006	48	rbal_637437732,rbal_637435949,rbal_637439755,rbal_637439546,rbal_637438274,rbal_637435680,rbal_637436923,rbal_637438502,rbal_637435948,rbal_637437073,rbal_637435992,rbal_637433336,rbal_637437500,rbal_637433378,rbal_637434451,rbal_637435331,rbal_637433238,rbal_637433480,rbal_637436328,rbal_637436329,rbal_637438347,rbal_637435085,rbal_637439727,rbal_637436526,rbal_637440297,rbal_637436833,rbal_6374…	similar to cis/trans isomerase::similar to S-layer related protein::hypothetical protein-signal peptide prediction::hypothetical protein-signal peptide prediction::hypothetical protein-putative transmembrane protein::hypothetical protein-signal peptide prediction::hypothetical protein::similar to endo-inulinase::putative WD-repeat containing protein::hypothetical protein-signal peptide and transm…
rbal_NCIM00007	48	rbal_637437894,rbal_637439133,rbal_637439504,rbal_637433796,rbal_637438334,rbal_637434966,rbal_637434134,rbal_637439221,rbal_637439215,rbal_637436572,rbal_637440200,rbal_637435487,rbal_637438743,rbal_637433925,rbal_637434410,rbal_637434273,rbal_637436342,rbal_637435653,rbal_637436077,rbal_637438832,rbal_637435499,rbal_637439159,rbal_637434472,rbal_637438257,rbal_637440170,rbal_637437193,rbal_6374…	nitrogen fixation protein anfA (sigma-54 dependendent transcription regulator::nitrogen regulation protein NR(I)::cetoacetate metabolism regulatory protein atoC::similar to response regulator::hydrogenase-4 transcriptional activator::acetoacetate metabolism regulatory protein atoC::probable transcriptional regulator::response regulator rcp1::NtrC-like response regulator SasR::probable hydrogenase…
rbal_NCIM00008	41	rbal_637436694,rbal_637439756,rbal_637439547,rbal_637435682,rbal_637438348,rbal_637436922,rbal_637438054,rbal_637438503,rbal_637437072,rbal_637433379,rbal_637435993,rbal_637437501,rbal_637433479,rbal_637435223,rbal_637434450,rbal_637439728,rbal_637434452,rbal_637433239,rbal_637433278,rbal_637435086,rbal_637436832,rbal_637440296,rbal_637440291,rbal_637434132,rbal_637439265,rbal_637438599,rbal_6374…	hypothetical protein-putative related to sulfatase::hypothetical protein::hypothetical protein-putative related to sulfatase::hypothetical protein::hypothetical protein::hypothetical protein::hypothetical protein-putative related to sulfatase::hypothetical protein-putative related to sulfatase::hypothetical protein::conserved hypothetical protein-putative related to sulfatase::hypothetical protei…
rbal_NCIM00009	37	rbal_637433650,rbal_637434789,rbal_637436479,rbal_637435887,rbal_637438548,rbal_637433826,rbal_637434867,rbal_637437210,rbal_637436246,rbal_637434802,rbal_637435562,rbal_637439494,rbal_637434662,rbal_637435067,rbal_637437916,rbal_637434987,rbal_637438837,rbal_637434013,rbal_637433558,rbal_637439558,rbal_637436864,rbal_637435974,rbal_637438716,rbal_637436930,rbal_637438553,rbal_637434798,rbal_6374…	NADH-dependent dehydrogenase::probable NADH-dependent dehydrogenase homolog::dehydrogenase homolog::probable NADH-dependent dehydrogenase::probable NADH-dependent dyhydrogenase::probable NADH-dependent dehydrogenase::probable dehydrogenase::probable NADH-dependent dyhydrogenase related protein::NADH-dependent dehydrogenase::probable Myo-inositol 2-dehydrogenase::probable NADH-dependent dehydrogen…
rbal_NCIM00010	33	rbal_637439391,rbal_637438585,rbal_637435962,rbal_637440245,rbal_637437767,rbal_637433391,rbal_637439839,rbal_637439840,rbal_637433766,rbal_637439497,rbal_637434622,rbal_637437233,rbal_637437235,rbal_637436124,rbal_637436595,rbal_637436019,rbal_637438955,rbal_637434595,rbal_637438636,rbal_637433526,rbal_637437842,rbal_637439023,rbal_637440196,rbal_637439187,rbal_637435594,rbal_637439990,rbal_6374…	hypothetical protein::conserved hypothetical protein-putative membrane bound PQQ-employing oxidoreductase::hypothetical protein::hypothetical protein::probable serine/threonine protein kinase related protein::probable serine/threonine protein kinase related protein::probable serine/threonine protein kinase related protein::similar to receptor protein kinase-like protein::similar to serine/threoni…
rbal_NCIM00011	25	rbal_637434028,rbal_637438335,rbal_637438410,rbal_637433295,rbal_637433921,rbal_637436472,rbal_637435563,rbal_637436264,rbal_637433005,rbal_637439870,rbal_637437980,rbal_637436919,rbal_637438263,rbal_637438096,rbal_637435291,rbal_637437493,rbal_637433385,rbal_637434792,rbal_637437168,rbal_637435174,rbal_637435153,rbal_637434404,rbal_637435210,rbal_637435726,rbal_637434462	similar to glucose dehydrogenase-B::probable L-sorbosone dehydrogenase::probable large, multifunctional secreted protein::probable secreted glycosyl hydrolase::hypothetical protein-transmembrane prediction::similar to L-sorbosone dehydrogenase::hypothetical protein-signal peptide prediction::hypothetical protein-transmembrane prediction::similar to L-sorbosone dehydrogenase::similar to c-type cyt…
rbal_NCIM00012	28	rbal_637438336,rbal_637439405,rbal_637438999,rbal_637438720,rbal_637436941,rbal_637439836,rbal_637435453,rbal_637438812,rbal_637435436,rbal_637437110,rbal_637434172,rbal_637434171,rbal_637436499,rbal_637438342,rbal_637437885,rbal_637436835,rbal_637435791,rbal_637433171,rbal_637436546,rbal_637434977,rbal_637437964,rbal_637437519,rbal_637437145,rbal_637439097,rbal_637436981,rbal_637435627,rbal_6374…	3-oxoacyl-[acyl-carrier protein] reductase::short chain dehydrogenase::enoyl-[acyl-carrier-protein] reductase::pteridine reductase 1-possibly short-chain dehydrogenase::glucose 1-dehydrogenase homolog::ketoacyl reductase::putative oxidoreductase of the short-chain dehydrogenase family::1-cyclohexenylcarbonyl CoA reductase-short chain family oxidoreductase::hypothetical oxidoreductase yhxD-putativ…
rbal_NCIM00013	27	rbal_637433451,rbal_637434005,rbal_637439563,rbal_637434009,rbal_637440067,rbal_637434277,rbal_637435416,rbal_637434666,rbal_637438793,rbal_637436633,rbal_637434665,rbal_637438797,rbal_637438794,rbal_637438227,rbal_637438657,rbal_637434298,rbal_637436389,rbal_637440077,rbal_637439181,rbal_637439183,rbal_637438538,rbal_637436110,rbal_637435534,rbal_637438103,rbal_637437129,rbal_637437128,rbal_6374…	probable surface-associated protein cshA precursor::probable fibrinogen-binding protein homolog-possibly involved in cell-cell attachment::probable aggregation factor core protein MAFp3, isoform C::alkaline phosphatase::conserved hypothetical protein-putative adhesin::vanadium chloroperoxidase::probable extracellular nuclease::hypothetical protein-putative cyclic nucleotide-binding protein::conse…
rbal_NCIM00014	23	rbal_637439591,rbal_637433901,rbal_637433002,rbal_637433003,rbal_637433000,rbal_637433001,rbal_637440177,rbal_637440176,rbal_637436877,rbal_637439748,rbal_637440150,rbal_637438490,rbal_637439007,rbal_637433897,rbal_637437829,rbal_637436999,rbal_637439588,rbal_637438044,rbal_637434634,rbal_637437001,rbal_637438045,rbal_637440168,rbal_637439590	hypothetical protein::hypothetical protein::hypothetical protein-putative conserved hypothetical protein::hypothetical protein::hypothetical protein-putative conserved hypothetical protein::hypothetical protein-putative conserved hypothetical protein::hypothetical protein::hypothetical protein::hypothetical protein::hypothetical protein::hypothetical protein::hypothetical protein::hypothetical pr…
rbal_NCIM00015	23	rbal_637439396,rbal_637436416,rbal_637437933,rbal_637439810,rbal_637436993,rbal_637435713,rbal_637433483,rbal_637435504,rbal_637435851,rbal_637436672,rbal_637438597,rbal_637438328,rbal_637440353,rbal_637438416,rbal_637434526,rbal_637439879,rbal_637433939,rbal_637437759,rbal_637435333,rbal_637440080,rbal_637436044,rbal_637434209,rbal_637436740	hypothetical protein::RNA polymerase sigma-70 factor::RNA polymerase sigma factor sigW::RNA polymerase ECF-type sigma factor::probable extracytoplasmic function alternative sigma factor (ECF family)::probable RNA polymerase sigma-70 factor, ECF subfamily::similar to ECF-family RNA polymerase sigma factor::probable RNA polymerase ECF-type sigma factor::probable ECF-like sigma factor SigE::probable…
rbal_NCIM00016	21	rbal_637435170,rbal_637433654,rbal_637436173,rbal_637433320,rbal_637433388,rbal_637436724,rbal_637433142,rbal_637433967,rbal_637435973,rbal_637435822,rbal_637433403,rbal_637436150,rbal_637433579,rbal_637435614,rbal_637438131,rbal_637438264,rbal_637438481,rbal_637437026,rbal_637439721,rbal_637434980,rbal_637435175	hypothetical protein::probable secreted glycosyl hydrolase::probable secreted glycosyl hydrolase::conserved hypothetical protein-putative secreted protein::conserved hypothetical protein-putative rhamnosidase::probable secreted glycosyl hydrolase::probable secreted glycosyl hydrolase::hypothetical protein::putative large multi-functional protein::hypothetical protein-transmembrane region and sign…
rbal_NCIM00017	19	rbal_637434333,rbal_637438358,rbal_637438803,rbal_637434327,rbal_637440004,rbal_637434037,rbal_637435919,rbal_637436368,rbal_637434319,rbal_637434316,rbal_637438895,rbal_637437022,rbal_637434611,rbal_637435391,rbal_637434950,rbal_637433541,rbal_637438804,rbal_637436674,rbal_637437665	LPS biosynthesis RfbU related protein::mannosyltransferase B::mannosyltransferase::probable hexosyltransferase::probable hexosyltransferase::probable glycosyltransferase::sucrose-phosphate synthase 1::capsular polysaccharide biosynthesis protein::probable hexosyltransferase::conserved hypothetical protein-putative poly(glycerol-phosphate) alpha-glucosyltransferase::lipopolysaccharide core biosynt…
rbal_NCIM00018	17	rbal_637434924,rbal_637435018,rbal_637434447,rbal_637435983,rbal_637433768,rbal_637440298,rbal_637436687,rbal_637438385,rbal_637438917,rbal_637440311,rbal_637434890,rbal_637435963,rbal_637434805,rbal_637433293,rbal_637434990,rbal_637438500,rbal_637433362	probable lactose operon transcription activator::probable Xyls/AraC-type transcriptional activator::probable transcription regulator::melibiose operon regulatory protein::Xylose operon regulatory protein::xylose operon regulatory protein::xylose operon regulatory protein::probable araC family transcription regulator::probable transcription regulator::xylose operon regulatory protein::melibiose op…
rbal_NCIM00019	18	rbal_637434357,rbal_637437205,rbal_637434905,rbal_637433529,rbal_637434351,rbal_637434340,rbal_637433949,rbal_637434346,rbal_637434360,rbal_637438119,rbal_637435045,rbal_637439032,rbal_637436636,rbal_637435056,rbal_637437987,rbal_637436515,rbal_637437800,rbal_637434549	GDP-mannose 4,6 dehydratase::CDP-tyvelose epimerase::probable UDP-glucose 4-epimerase GalE2::3-beta-hydroxysteroid dehydrogenase::GDP-D-mannose dehydratase 1::UDP-glucose 4-epimerase::udp-glucose 4-epimerase::dTDP-glucose-4,6-dehydratase::GDP-fucose synthetase::nucleotide sugar epimerase::dTDP-glucose 4-6-dehydratase::probable oxidoreductase::sulfolipid biosynthesis protein SqdC::UDP-glucose 4-ep…
rbal_NCIM00020	18	rbal_637433280,rbal_637437212,rbal_637436371,rbal_637433943,rbal_637437906,rbal_637438293,rbal_637433794,rbal_637438087,rbal_637436915,rbal_637437594,rbal_637439625,rbal_637440241,rbal_637438843,rbal_637436719,rbal_637437575,rbal_637435242,rbal_637436404,rbal_637438027	probable regulatory protein::methanol dehydrogenase regulator (moxR) homolog::probable regulatory protein::methanol dehydrogenase regulator (moxR) homolog::moxR-type regulator::MoxR-related protein::methanol dehydrogenase regulatory protein::MoxR-related protein::holliday junction DNA helicase RuvB::probable MoxR-related protein::methanol dehydrogenase regulatory protein::MoxR-related protein::me…
rbal_NCIM00021	17	rbal_637433329,rbal_637438570,rbal_637436614,rbal_637437515,rbal_637434637,rbal_637439689,rbal_637435710,rbal_637436703,rbal_637436955,rbal_637438541,rbal_637439975,rbal_637436885,rbal_637439613,rbal_637434736,rbal_637434490,rbal_637433223,rbal_637435842	hypothetical protein-signal peptide prediction::hypothetical protein::hypothetical protein::hypothetical protein-signal peptide prediction::hypothetical protein::hypothetical protein::hypothetical protein-signal peptide prediction::hypothetical protein-signal peptide prediction::hypothetical protein::hypothetical protein-putative conserved hypothetical protein::hypothetical protein-signal peptide…
rbal_NCIM00022	17	rbal_637433622,rbal_637434689,rbal_637437156,rbal_637439780,rbal_637434380,rbal_637435204,rbal_637436374,rbal_637433513,rbal_637433514,rbal_637433486,rbal_637437147,rbal_637433493,rbal_637433612,rbal_637434700,rbal_637436516,rbal_637436465,rbal_637436461	integrase::putative integrase/recombinase Y4QK::putative integrase/recombinase Y4QK::probable integrase-recombinase protein::integrase::integrase::integrase/recombinase::integrase::hypothetical protein::integrase::putative integrase/recombinase y4qk::integrase::probable integrase::probable integrase/recombinase Y4QK::integrase/recombinase::putative integrase/recombinase::putative integrase/recomb…
rbal_NCIM00023	16	rbal_637439662,rbal_637435036,rbal_637433170,rbal_637439669,rbal_637435433,rbal_637437034,rbal_637438810,rbal_637433174,rbal_637440362,rbal_637435509,rbal_637439095,rbal_637438353,rbal_637433842,rbal_637435015,rbal_637438340,rbal_637436662	polyketide synthase::probable 3-oxoacyl-(acyl-carrier protein) synthase::malonyl CoA-acyl carrier protein transacylase::quinone oxidoreductase::quinone oxidoreductase::3-oxoacyl-(acyl-carrier protein) synthase::probable multi-domain beta keto-acyl synthase-possibly involved in fatty acid or polyketide biosynthesis::3-oxoacyl-[acyl-carrier-protein] synthase::putative zinc-binding alcohol dehydroge…
rbal_NCIM00024	17	rbal_637435841,rbal_637438569,rbal_637435711,rbal_637436615,rbal_637434636,rbal_637434491,rbal_637439976,rbal_637437513,rbal_637438542,rbal_637436956,rbal_637433328,rbal_637439690,rbal_637436704,rbal_637434735,rbal_637433222,rbal_637439614,rbal_637436883	hypothetical protein-transmembrane region and signal peptide prediction::hypothetical protein-signal peptide and transmembrane prediction::hypothetical protein-signal peptide prediction::hypothetical protein::hypothetical protein-signal peptide prediction::hypothetical protein-signal peptide and transmembrane prediction::hypothetical protein-signal peptide and transmembrane prediction::hypothetic…
rbal_NCIM00025	15	rbal_637434917,rbal_637434832,rbal_637434830,rbal_637438062,rbal_637437079,rbal_637438178,rbal_637434829,rbal_637438067,rbal_637438588,rbal_637439158,rbal_637433052,rbal_637438879,rbal_637433465,rbal_637436894,rbal_637438112	probable ASPIC::hypothetical protein::hypothetical protein::similar to RTX family exoprotein::hypothetical protein-transmembrane prediction::similar to ASPIC::hypothetical protein::conserved hypothetical protein containing TPR domain::hypothetical protein::similar to ASPIC::probable cysteine proteinase::conserved hypothetical protein-putative containing TPR-repeat::hypothetical protein::probable …
rbal_NCIM00026	14	rbal_637437213,rbal_637433281,rbal_637433944,rbal_637433804,rbal_637437595,rbal_637438254,rbal_637433793,rbal_637438294,rbal_637440243,rbal_637437905,rbal_637436625,rbal_637438842,rbal_637437848,rbal_637438030	hypothetical protein::hypothetical protein::hypothetical protein::hypothetical protein::hypothetical protein::hypothetical protein::probable membrane protein::hypothetical protein::probable membrane protein::hypothetical protein::hypothetical protein::hypothetical protein::hypothetical protein::hypothetical protein
rbal_NCIM00027	13	rbal_637433090,rbal_637433620,rbal_637433434,rbal_637433086,rbal_637435005,rbal_637439550,rbal_637436777,rbal_637433266,rbal_637439569,rbal_637440195,rbal_637433374,rbal_637435373,rbal_637436310	putative transposase::transposase::transposase::transposase::probable transposase of IS981C::conserved hypothetical protein-putative transposase::putative transposase::probable transposase::conserved hypothetical protein-putative transposase::conserved hypothetical protein-putative transposase::transposase::InsB::putative transposase
rbal_NCIM00028	13	rbal_637438651,rbal_637434925,rbal_637440306,rbal_637435945,rbal_637434187,rbal_637435610,rbal_637439947,rbal_637439634,rbal_637437460,rbal_637437249,rbal_637434848,rbal_637436787,rbal_637440308	endo-1,4-beta-xylanase B::probable endo-1,4-beta-xylanase B::probable lipase/esterase::probable endo-1,4-beta-xylanase B::probable lipase/esterase::probable lipase/esterase::probable lipase/esterase::probable lipase/esterase::probable lipase::probable lipase/esterase::probable lipase/esterase::lipase::probable lipase/esterase
rbal_NCIM00029	13	rbal_637434072,rbal_637434071,rbal_637437137,rbal_637433722,rbal_637437136,rbal_637436174,rbal_637439529,rbal_637440094,rbal_637439611,rbal_637437462,rbal_637438229,rbal_637436652,rbal_637437138	probable serine protease::probable serine protease DO-like::serine proteinase, HtrA/DegQ/DegS family::probable serine protease do-like DEGP::periplasmic serine proteinase DO::serine protease::periplasmic serine proteinase Do::serine proteinase::probable periplasmic serine proteinase::probable secreted proteinase::probable serine protease do-like::protease Do-like (S2 serine-type protease)::HtrA
rbal_NCIM00030	13	rbal_637436535,rbal_637439644,rbal_637438361,rbal_637436283,rbal_637434156,rbal_637433870,rbal_637440141,rbal_637433155,rbal_637437988,rbal_637440336,rbal_637438369,rbal_637437303,rbal_637434314	dolichol-phosphate mannosyltransferase::conserved hypothetical protein-putative glycosyl transferase::sugar transferase-putative a glycosyl transferase::probable glycosyltransferase involved in cell wall biogenesis::hypothetical protein::putative glycosyl transferase::probable dolichyl-phosphate mannose synthase::dolichol-phosphate mannosyltransferase::putative polyprenol phosphate mannosyl trans…
rbal_NCIM00031	13	rbal_637434530,rbal_637439979,rbal_637436252,rbal_637439757,rbal_637436201,rbal_637435211,rbal_637438038,rbal_637437832,rbal_637437857,rbal_637438774,rbal_637436840,rbal_637436584,rbal_637438232	probable thioredoxin::probable thioredoxin::probable thioredoxin::thioredoxin 1::probable thiol-disulfide interchange protein::hypothetical protein-transmembrane prediction::probable cytochrome c biogenesis protein CycX homolog::probable thioredoxin related protein ykvV::probable thioredoxin::thioredoxin::DipZ protein, thioredoxin related to cytochrome c::probable thioredoxin related protein::pro…
rbal_NCIM00032	12	rbal_637438316,rbal_637435873,rbal_637433100,rbal_637433446,rbal_637439103,rbal_637434269,rbal_637436089,rbal_637438373,rbal_637438306,rbal_637439245,rbal_637439150,rbal_637439195	RND multidrug efflux membrane fusion protein MexE precursor::probable membrane-fusion protein::probable membrane-fusion protein::probable multidrug resistance efflux pump::probable membrane fusion protein mtrC::multidrug resistance protein MexA::conserved hypothetical protein-putative multidrug resistance efflux pump::probable membrane protein::conserved hypothetical protein-putative multidrug re…
rbal_NCIM00033	12	rbal_637438317,rbal_637439104,rbal_637433101,rbal_637434267,rbal_637435874,rbal_637433444,rbal_637436088,rbal_637439149,rbal_637439246,rbal_637435720,rbal_637439194,rbal_637435512	RND multidrug efflux transporter MexF::probable RND efflux transporter::cation efflux system, AcrB/AcrD/AcrF family::similar to multidrug resistance protein MexB::cation/multidrug efflux pump::cation/multidrug efflux pump::probable multidrug resistance protein::acriflavine resistance protein B::cation efflux system protein CZCA::predicted cation efflux system (AcrB/AcrD/AcrF family)::probable mul…
rbal_NCIM00034	12	rbal_637434902,rbal_637433111,rbal_637439211,rbal_637434359,rbal_637433301,rbal_637435380,rbal_637434200,rbal_637439921,rbal_637436466,rbal_637438128,rbal_637438849,rbal_637439177	hypothetical protein::hypothetical protein-signal peptide prediction::hypothetical protein-signal peptide prediction::hypothetical protein::hypothetical protein::hypothetical protein::hypothetical protein::hypothetical protein::hypothetical protein::hypothetical protein-putative conserved hypothetical protein::hypothetical protein::hypothetical protein
rbal_NCIM00035	12	rbal_637434153,rbal_637435464,rbal_637434664,rbal_637434698,rbal_637434699,rbal_637434647,rbal_637433613,rbal_637438961,rbal_637433383,rbal_637434696,rbal_637434697,rbal_637433614	hypothetical protein::hypothetical protein::hypothetical protein::hypothetical protein::hypothetical protein::hypothetical protein::hypothetical protein::hypothetical protein::hypothetical protein::hypothetical protein::hypothetical protein::hypothetical protein
rbal_NCIM00036	12	rbal_637439458,rbal_637440107,rbal_637440106,rbal_637436339,rbal_637440103,rbal_637433597,rbal_637439277,rbal_637434887,rbal_637433063,rbal_637438698,rbal_637440256,rbal_637438697	general secretion pathway protein E::type IV fimbrial assembly protein PilB::twitching mobility protein PilT::secretion system protein TadA::type IV fimbrial assembly protein PilB::secretory protein kinase::probable general secretion pathway protein E::general secretion pathway protein E::general secretion pathway protein E::twitching motility protein PilT::putative secretory protein::general sec…
rbal_NCIM00037	11	rbal_637437211,rbal_637437390,rbal_637434958,rbal_637435892,rbal_637435891,rbal_637434110,rbal_637433271,rbal_637433270,rbal_637433272,rbal_637434939,rbal_637436792	conserved hypothetical protein-containing TPR-domains::similar to tolB protein::similar to peptidase yuxL::hypothetical protein-transmembrane prediction::hypothetical protein::hypothetical protein-signal peptide and transmembrane prediction::similar to FKBP-rapamycin associated protein::hypothetical protein-signal peptide and transmembrane prediction::hypothetical protein-transmembrane prediction…
rbal_NCIM00038	10	rbal_637434142,rbal_637436795,rbal_637439803,rbal_637436294,rbal_637436382,rbal_637436736,rbal_637439889,rbal_637438515,rbal_637440324,rbal_637437705	InsA (transposase)::transposase::transposase::transposase::transposase::transposase::transposase::InsA (transposase)::transposase::probable InsA (transposase)
rbal_NCIM00039	10	rbal_637439804,rbal_637434141,rbal_637436737,rbal_637436295,rbal_637436381,rbal_637439888,rbal_637440325,rbal_637438516,rbal_637436794,rbal_637437706	hypothetical protein::hypothetical protein::hypothetical protein::hypothetical protein::hypothetical protein::hypothetical protein::hypothetical protein::hypothetical protein::hypothetical protein::hypothetical protein
rbal_NCIM00040	10	rbal_637439501,rbal_637435326,rbal_637439724,rbal_637435935,rbal_637438411,rbal_637436780,rbal_637435388,rbal_637438106,rbal_637438107,rbal_637436779	hypothetical protein::hypothetical protein::hypothetical protein::hypothetical protein::hypothetical protein-putative conserved hypothetical protein::hypothetical protein::hypothetical protein::hypothetical protein::hypothetical protein::hypothetical protein
rbal_NCIM00041	10	rbal_637435595,rbal_637438781,rbal_637434112,rbal_637433730,rbal_637439680,rbal_637435201,rbal_637440232,rbal_637439932,rbal_637436196,rbal_637439908	hypothetical protein-transmembrane prediction::probable receptor protein kinase::hypothetical protein::similar to adenylate cyclase regulatory protein::probable G protein-coupled receptor LGR4::hypothetical protein::conserved hypothetical protein-putative receptor protein kinase::hypothetical protein::conserved hypothetical protein-putative adenylate cyclase regulatory protein::conserved hypothet…
rbal_NCIM00042	10	rbal_637439008,rbal_637434515,rbal_637436070,rbal_637436152,rbal_637439850,rbal_637435298,rbal_637435289,rbal_637440185,rbal_637433832,rbal_637436439	hypothetical protein-transmembrane region and signal peptide prediction::hypothetical protein-transmembrane prediction::hypothetical protein-signal peptide and transmembrane prediction::hypothetical protein-signal peptide and transmembrane prediction::hypothetical protein-signal peptide and transmembrane prediction::hypothetical protein-signal peptide prediction::RNA polymerase sigma-H factor::hy…
rbal_NCIM00043	10	rbal_637433621,rbal_637434381,rbal_637433512,rbal_637437148,rbal_637436462,rbal_637435203,rbal_637433618,rbal_637433492,rbal_637434690,rbal_637433498	probable transposase::probable transposase::transposase::putative transposase y4qj::putative transposase::transposase::transposase::transposase::transposase::transposase
rbal_NCIM00044	10	rbal_637433433,rbal_637433089,rbal_637439568,rbal_637433619,rbal_637436311,rbal_637439549,rbal_637440194,rbal_637433373,rbal_637435372,rbal_637436778	similar to transposase::probable transposase::probable transposase A::probable transposase A::probable transposase A::probable transposase A::probable transposase::probable transposase::conserved hypothetical protein-putative transposase::probable transposase A
rbal_NCIM00045	12	rbal_637438604,rbal_637433923,rbal_637439995,rbal_637434748,rbal_637436351,rbal_637433534,rbal_637433881,rbal_637439767,rbal_637433720,rbal_637434959,rbal_637436074,rbal_637438736	conserved hypothetical protein-putative phosphohydrolase involved in signal transduction::conserved hypothetical protein-putative phosphohydrolase::GGDEF family protein::hypothetical protein::probable response regulatory protein::response regulator::hypothetical protein::hypothetical protein::hypothetical protein::conserved hypothetical protein-putative response regulator::probable two-component …
rbal_NCIM00046	9	rbal_637434810,rbal_637433750,rbal_637433662,rbal_637434624,rbal_637439141,rbal_637433733,rbal_637435888,rbal_637437764,rbal_637437981	Sialidase::hypothetical protein-transmembrane region and signal peptide prediction::hypothetical protein::probable sialidase::hypothetical protein::similar to nucleoside hydrolase::hypothetical protein::hypothetical protein::neuraminidase precursor
rbal_NCIM00047	9	rbal_637437049,rbal_637437630,rbal_637439593,rbal_637439575,rbal_637437339,rbal_637436757,rbal_637435263,rbal_637438622,rbal_637439182	hypothetical protein::hypothetical protein-transmembrane prediction::hypothetical protein::hypothetical protein::hypothetical protein::hypothetical protein::hypothetical protein::hypothetical protein::hypothetical protein
rbal_NCIM00048	9	rbal_637439505,rbal_637439665,rbal_637436449,rbal_637436136,rbal_637438418,rbal_637440085,rbal_637434738,rbal_637439128,rbal_637433540	probable ferric enterobactin esterase-related protein Fes::conserved hypothetical protein-putative hydrolase::hypothetical protein::gluconolactonase::probable gluconolactonase precursor-hypothetical secreted or membrane associated protein::gluconolactonase::possible gluconolactonase precursor::enterochelin esterase::gluconolactonase
rbal_NCIM00049	9	rbal_637433571,rbal_637433285,rbal_637436629,rbal_637439701,rbal_637439449,rbal_637433604,rbal_637433347,rbal_637438037,rbal_637439443	hypothetical protein-transmembrane prediction::hypothetical protein-signal peptide prediction::hypothetical protein::hypothetical protein-putative transmembrane protein::hypothetical protein::similar to squalene-hopene cyclase::hypothetical protein-transmembrane prediction::similar to squalene-hopene cyclase::similar to squalene-hopene-cyclase
rbal_NCIM00050	9	rbal_637440349,rbal_637434067,rbal_637435233,rbal_637440351,rbal_637435234,rbal_637434069,rbal_637437244,rbal_637437247,rbal_637433600	hypothetical protein-transmembrane prediction::hypothetical protein-transmembrane prediction::hypothetical protein-transmembrane prediction::hypothetical protein-transmembrane prediction::hypothetical protein-transmembrane prediction::hypothetical protein-transmembrane prediction::hypothetical protein-signal peptide and transmembrane prediction::hypothetical protein-putative transporter::hypothet…
rbal_NCIM00051	9	rbal_637436096,rbal_637439508,rbal_637433865,rbal_637436053,rbal_637437406,rbal_637436637,rbal_637436400,rbal_637437450,rbal_637437479	translation initiation factor IF-2::GTP-binding protein LepA::GTP-binding protein LepA::elongation factor EF-2::elongation factor G::GTP-binding translation elongation factor homolog::adenylylsulfate kinase::translational elongation factor-Tu::binfunctional sulfate adenylyltransferase subunit 1/adenylylsulfate kinase protein
rbal_NCIM00052	9	rbal_637437601,rbal_637436355,rbal_637440344,rbal_637437125,rbal_637436646,rbal_637438830,rbal_637439700,rbal_637433837,rbal_637438226	ATP-dependent RNA helicase::ATP-dependent DNA helicase RecQ::ATP-dependent DNA helicase RecQ::ATP-dependent RNA helicase::DNA-dependent ATPase DNA helicase (RecQ)::recQ::putative ATP-dependent RNA helicase rhlE::putative ATP-dependent helicase::ATP-dependent DNA helicase RecQ
rbal_NCIM00053	9	rbal_637438634,rbal_637439110,rbal_637436916,rbal_637436393,rbal_637437469,rbal_637439184,rbal_637433276,rbal_637433344,rbal_637438482	probable RNA polymerase sigma-E factor::probable RNA-polymerase sigma-E factor::probable RNA polymerase sigma-E factor (ECF subfamily of sigma-70)::probable RNA polymerase sigma-E factor::probable ECF sigma factor AdsA::probable RNA polymerase sigma-E factor::probable RNA polymerase ECF-type sigma factor::probable sigma-70 factor, ECF subfamily::probable RNA polymerase sigma factor cnrH
rbal_NCIM00054	8	rbal_637437600,rbal_637433108,rbal_637434741,rbal_637439714,rbal_637439538,rbal_637437642,rbal_637433836,rbal_637436168	probable glyoxylate-induced protein::sugar phosphate isomerase/epimerase::probable D-tagatose 3-epimerase::hypothetical protein::conserved hypothetical protein-putative tagatose 3-epimerase::hypothetical protein::probable hexulose-6-phosphate isomerase::conserved hypothetical protein-putative sugar phosphate isomerase/epimerase
rbal_NCIM00055	8	rbal_637433668,rbal_637433669,rbal_637433299,rbal_637435845,rbal_637434050,rbal_637434051,rbal_637434052,rbal_637435843	hypothetical protein::hypothetical protein::hypothetical protein::hypothetical protein::hypothetical protein::hypothetical protein::hypothetical protein::hypothetical protein
rbal_NCIM00056	8	rbal_637434828,rbal_637438589,rbal_637437330,rbal_637433468,rbal_637436484,rbal_637439893,rbal_637440384,rbal_637436510	hypothetical protein-signal peptide and transmembrane prediction::probable c-type cytochrome precursor::similar to c-type cytochrome precursor-putative periplasmic heme binding protein::similar to c-type cytochrome precursor::hypothetical protein::similar to c-type cytochrome precursor::probable c-type cytochrome precursor::probable deca-heme c-type cytochrome
rbal_NCIM00057	8	rbal_637439647,rbal_637433984,rbal_637434389,rbal_637433364,rbal_637437640,rbal_637439096,rbal_637438664,rbal_637438009	probable aldehyde dehydrogenase (NAD+)::probable aldehyde dehydrogenase::ethanolamine utilization protein EutE::aldehyde dehydrogenase::proline dehydrogenase / 1-pyrroline-5-carboxylate dehydrogenase::succinate-semialdehyde dehydrogenase::aldehyde dehydrogenase::ketoglutarate semialdehyde dehydrogenase
rbal_NCIM00058	8	rbal_637437775,rbal_637433076,rbal_637436979,rbal_637433883,rbal_637438374,rbal_637438188,rbal_637437279,rbal_637433395	similar to secretion protein::probable outer membrane channel protein::hypothetical protein::hypothetical protein::similar to AprF-putative outer membrane efflux protein or secreted alkaline phosphatase::hypothetical protein-putative conserved hypothetical protein::hypothetical protein::probable beta-lactamase regulatory protein
rbal_NCIM00059	8	rbal_637435736,rbal_637434421,rbal_637435918,rbal_637434612,rbal_637439866,rbal_637438179,rbal_637433308,rbal_637435921	glycogen operon protein glgX-2::glycogen branching enzyme::alpha-amylase, amylosucrase::oligo-1,6-glucosidase::sucrose phosphorylase::glycogen operon protein glgX-2::1,4-alpha-glucan branching enzyme::alpha-amylase
rbal_NCIM00060	8	rbal_637435989,rbal_637434259,rbal_637436289,rbal_637436344,rbal_637434891,rbal_637438963,rbal_637439193,rbal_637435272	probable zinc-type alcohol dehydrogenase::probable formaldehyde dehydrogenase::alcohol dehydrogenase, zinc-containing::probable alcohol dehydrogenase (Zn-dependent)::sorbitol dehydrogenase::glutathione-dependent formaldehyde dehydrogenase::hypothetical zinc-type alcohol dehydrogenase-like protein yjgB::zinc-type alcohol dehydrogenase
rbal_NCIM00061	7	rbal_637433981,rbal_637433652,rbal_637433109,rbal_637436714,rbal_637435327,rbal_637436468,rbal_637440126	hypothetical protein-signal peptide prediction::similar to notch homolog::similar to neurogenic locus Notch protein::hypothetical protein::hypothetical protein::hypothetical protein::hypothetical protein
rbal_NCIM00062	8	rbal_637436805,rbal_637433216,rbal_637437098,rbal_637437780,rbal_637434709,rbal_637436680,rbal_637440365,rbal_637434095	peptide synthase::saframycin Mx1 synthetase B::peptide synthetase::2-acylglycerophosphoethanolamine acyltransferase (aas)::8-amino-7-oxononanoate synthase::2-acyl-glycerophospho-ethanolamine acyltransferase::acetyl-coenzyme A synthetase::Acyl-CoA synthetase
rbal_NCIM00063	7	rbal_637433995,rbal_637435430,rbal_637433647,rbal_637434465,rbal_637436212,rbal_637438007,rbal_637439224	nitrite reductase::glutathione reductase::dihydrolipoamide dehydrogenase::dihydrolipoamide dehydrogenase::soluble pyridine nucleotide transhydrogenase::probable NADH oxidase::mercuric reductase
rbal_NCIM00064	7	rbal_637437219,rbal_637437748,rbal_637436685,rbal_637434808,rbal_637435530,rbal_637440378,rbal_637437923	putative integral membrane transport protein::high affinity choline transporter::sodium/glucose cotransporter::conserved hypothetical protein-putative sodium:solute symporter::sodium/glucose cotransporter::urea transporter or sodium transporter::sodium iodide symporter
rbal_NCIM00065	7	rbal_637437169,rbal_637437189,rbal_637438915,rbal_637437251,rbal_637439452,rbal_637434953,rbal_637438138	aminotransferase NifS-putative NifS homolog::cysteine desulfurase NifS::nifS protein::isopenicillin N-epimerase::cysteine desulfurase::NifS protein homolog yurW::NifS-like aminotranfserase-putative cysteine desulfurase
rbal_NCIM00066	7	rbal_637434150,rbal_637436242,rbal_637438710,rbal_637439824,rbal_637435470,rbal_637438957,rbal_637435468	small conductance mechanosensitive ion channel::potassium efflux system KefA::conserved hypothetical protein-putative mechanosensitive ion channel::small-conductance mechanosensitive channel::hypothetical protein::conserved hypothetical protein-putative transmembrane channel protein::hypothetical protein
rbal_NCIM00067	7	rbal_637434527,rbal_637438329,rbal_637435332,rbal_637435712,rbal_637436045,rbal_637433482,rbal_637435850	hypothetical protein-transmembrane prediction::hypothetical protein-transmembrane prediction::hypothetical protein-transmembrane prediction::hypothetical protein-transmembrane prediction::similar to cycloinulo-oligosaccharide fructanotransferase::hypothetical protein-transmembrane prediction::hypothetical protein-transmembrane prediction
rbal_NCIM00068	7	rbal_637435743,rbal_637435750,rbal_637435805,rbal_637439957,rbal_637437912,rbal_637438690,rbal_637438688	ATP synthase subunit B::ATP synthase subunit A::transcription termination factor Rho::flagellum-specific ATP synthase::transcription termination factor Rho::ATP synthase subunit B::ATP synthase subunit A
rbal_NCIM00069	7	rbal_637436819,rbal_637438754,rbal_637435041,rbal_637433737,rbal_637436559,rbal_637437666,rbal_637436844	sigma-70 factor::RNA polymerase sigma factor rpoD::RNA polymerase sigma factor rpoS::probable RNA polymerase sigma 70::transcription initiation factor sigma 70::RNA polymerase sigma factor whiG::transcription initiation factor sigma 70
rbal_NCIM00070	7	rbal_637434555,rbal_637439702,rbal_637438948,rbal_637433605,rbal_637438947,rbal_637435164,rbal_637435163	probable Biopolymer transport exbD protein::conserved hypothetical protein-putative export protein ExbD::probable biopolymer transport exbD protein::probable biopolymer transport ExbD protein::similar to biopolymer transport exbD2 protein::hypothetical protein-transmembrane prediction::hypothetical protein-transmembrane prediction
rbal_NCIM00071	7	rbal_637436254,rbal_637440278,rbal_637436593,rbal_637438753,rbal_637436754,rbal_637437482,rbal_637439917	conserved hypothetical protein-putative TPR-repeat-containing protein::probable type IV fimbrial biogenesis protein PilF::probable PKR inhibitor (translation regulation)::FlbA protein::hypothetical protein::probable O-linked GlcNAc transferase::O-GlcNAc transferase
rbal_NCIM00072	7	rbal_637434353,rbal_637439816,rbal_637434106,rbal_637435427,rbal_637434113,rbal_637438549,rbal_637434548	hypothetical protein::hypothetical protein::hypothetical protein::hypothetical protein::hypothetical protein::hypothetical protein-transmembrane prediction::hypothetical protein
rbal_NCIM00073	7	rbal_637434907,rbal_637434900,rbal_637434901,rbal_637435984,rbal_637434908,rbal_637434899,rbal_637435063	hypothetical protein-signal peptide and transmembrane prediction::hypothetical protein-signal peptide and transmembrane prediction::hypothetical protein::hypothetical protein-signal peptide and transmembrane prediction::hypothetical protein-signal peptide and transmembrane prediction::hypothetical protein-signal peptide and transmembrane prediction::hypothetical protein-signal peptide and transme…
rbal_NCIM00074	7	rbal_637439589,rbal_637440164,rbal_637439729,rbal_637438471,rbal_637440165,rbal_637433298,rbal_637439747	hypothetical protein::hypothetical protein::hypothetical protein::hypothetical protein::hypothetical protein::hypothetical protein::hypothetical protein
rbal_NCIM00075	7	rbal_637437143,rbal_637440149,rbal_637435586,rbal_637433635,rbal_637435990,rbal_637435833,rbal_637434601	hypothetical protein::hypothetical protein::hypothetical protein::probable hexulose-6-phosphate isomerase::similar to myo-inositol catabolism protein IolH::hypothetical protein::hypothetical protein
rbal_NCIM00076	6	rbal_637439970,rbal_637433072,rbal_637434427,rbal_637433887,rbal_637438192,rbal_637438827	hypothetical protein-transmembrane prediction::hypothetical protein-transmembrane prediction::hypothetical protein::hypothetical protein::hypothetical protein::conserved hypothetical protein-putative transmembrane protein
rbal_NCIM00077	7	rbal_637437887,rbal_637433934,rbal_637433587,rbal_637438455,rbal_637436931,rbal_637440140,rbal_637440098	hypothetical protein::hypothetical protein::hypothetical protein::hypothetical protein::hypothetical protein::hypothetical protein::hypothetical protein
rbal_NCIM00078	6	rbal_637433946,rbal_637433283,rbal_637439003,rbal_637436627,rbal_637438032,rbal_637437598	hypothetical protein-transmembrane prediction::hypothetical protein-signal peptide prediction::conserved hypothetical protein-putative transmembrane protein::similar to En/Spm-like transposon protein::conserved hypothetical protein-putative transmembrane protein::hypothetical protein-transmembrane prediction
rbal_NCIM00079	6	rbal_637438061,rbal_637438056,rbal_637433121,rbal_637434212,rbal_637433473,rbal_637434045	hypothetical protein-signal peptide and transmembrane prediction::hypothetical protein::hypothetical protein-signal peptide and transmembrane prediction::hypothetical protein-signal peptide and transmembrane prediction::hypothetical protein::hypothetical protein-signal peptide prediction
rbal_NCIM00080	6	rbal_637438207,rbal_637433578,rbal_637438900,rbal_637433381,rbal_637435280,rbal_637437328	hypothetical protein::hypothetical protein::hypothetical protein::hypothetical protein::hypothetical protein::hypothetical protein
rbal_NCIM00081	6	rbal_637440109,rbal_637437876,rbal_637439594,rbal_637439459,rbal_637437875,rbal_637434888	type IV fimbrial assembly protein PilC::probable type IV pilus assembly protein TapC::general secretion pathway protein F-putative pilus protein::general secretion pathway protein F::probable type IV pilin biogenesis protein PilC::type 4 fimbrial assembly protein pilC
rbal_NCIM00082	6	rbal_637433588,rbal_637433752,rbal_637433754,rbal_637433755,rbal_637438739,rbal_637438738	probable NADH dehydrogenase::NADH dehydrogenase subunit N::putative NADH-ubiquinone oxidoreductase subunit::NADH dehydrogenase/oxidoreductase::NADH subunit 5::NADH dehydrogenase (ubiquinone) chain M
rbal_NCIM00083	6	rbal_637438617,rbal_637433779,rbal_637434880,rbal_637434702,rbal_637438645,rbal_637434198	hypothetical protein::hypothetical protein::hypothetical protein::hypothetical protein::hypothetical protein-putative conserved hypothetical protein::hypothetical protein
rbal_NCIM00084	6	rbal_637436256,rbal_637433452,rbal_637437191,rbal_637438729,rbal_637436959,rbal_637434174	conserved hypothetical protein-putative ferredoxin::hypothetical protein-signal peptide prediction::hypothetical protein::hypothetical protein-signal peptide prediction::hypothetical protein-transmembrane prediction::hypothetical protein
rbal_NCIM00085	6	rbal_637439985,rbal_637436473,rbal_637436747,rbal_637436886,rbal_637436012,rbal_637439737	hypothetical protein::hypothetical protein::hypothetical protein::hypothetical protein::hypothetical protein::hypothetical protein
rbal_NCIM00086	6	rbal_637433128,rbal_637435379,rbal_637436776,rbal_637435387,rbal_637438893,rbal_637436001	probable transposase::conserved hypothetical protein-putative transposase::probable transposase::conserved hypothetical protein-putative transposase::similar to transposase insG for insertion sequence element IS4::similar to transposase
rbal_NCIM00087	6	rbal_637433176,rbal_637439969,rbal_637433074,rbal_637433884,rbal_637438191,rbal_637438826	probable multidrug efflux pump::hypothetical protein-signal peptide prediction::probable cation efflux system::probable cation efflux system (czcB-like)::probable copper efflux system protein cusB (Precursor)::probable AcrA/AcrE family protein-putative secreted protein
rbal_NCIM00088	6	rbal_637434428,rbal_637439968,rbal_637433073,rbal_637433886,rbal_637438190,rbal_637438825	similar to membrane spanning export protein::hypothetical protein-transmembrane prediction::probable membrane-fusion protein::hypothetical protein::hypothetical protein-transmembrane prediction::similar to alkaline proteinase secretion protein aprE
rbal_NCIM00089	5	rbal_637436463,rbal_637433511,rbal_637437149,rbal_637433491,rbal_637433497	hypothetical protein::hypothetical protein::hypothetical protein::hypothetical protein::hypothetical protein
rbal_NCIM00090	5	rbal_637435467,rbal_637435418,rbal_637439826,rbal_637433350,rbal_637438318	hypothetical protein::hypothetical protein::predicted permease::predicted permease::putative membrane protein-putative a permease
rbal_NCIM00091	5	rbal_637435395,rbal_637439169,rbal_637440151,rbal_637436013,rbal_637438150	similar to transposase::similar to transposase::hypothetical protein-putative transposase::similar to transposase::similar to transposase
rbal_NCIM00092	5	rbal_637437051,rbal_637437735,rbal_637433396,rbal_637435266,rbal_637440339	hypothetical protein::hypothetical protein::similar to beta-lactamase repressor protein::probable Penicillinase repressor::probable beta-lactamase repressor
rbal_NCIM00093	5	rbal_637439129,rbal_637436928,rbal_637439132,rbal_637435378,rbal_637436663	probable ABC transport system integral membrane protein::probable ATP-binding/permease fusion ABC transporter::putative ABC transporter integral membrane protein::hypothetical protein::conserved hypothetical protein-putative permease
rbal_NCIM00094	5	rbal_637438960,rbal_637434136,rbal_637439811,rbal_637435209,rbal_637435959	hypothetical protein::hypothetical protein-transmembrane prediction::hypothetical protein::hypothetical protein::hypothetical protein
rbal_NCIM00095	5	rbal_637437734,rbal_637434011,rbal_637437052,rbal_637435265,rbal_637440338	probable penicillinase antirepressor penJ::similar to thioredoxin H-type::probable penicillin resistance regulatory protein::probable regulatory protein blaR1::hypothetical protein-putative transmembrane protein
rbal_NCIM00096	5	rbal_637436148,rbal_637436761,rbal_637438552,rbal_637438429,rbal_637438105	hypothetical protein::hypothetical protein::hypothetical protein::hypothetical protein::similar to titin
rbal_NCIM00097	5	rbal_637436139,rbal_637433337,rbal_637438659,rbal_637439672,rbal_637439843	similar to RNA polymerase sigma-E factor::hypothetical protein-putative sigma factor::conserved hypothetical protein-putative sigma factor::hypothetical protein-putative sigma factor protein::similar to extracytoplasmic sigma factor ECF
rbal_NCIM00098	5	rbal_637433743,rbal_637440375,rbal_637435905,rbal_637440276,rbal_637433821	conserved hypothetical protein-putative protein transporter::general secretion pathway protein D (outD)::putative outer membrane channel for pilus assembly CpaC::probable type II secretion system protein::general secretion pathway protein D
rbal_NCIM00099	5	rbal_637439325,rbal_637439489,rbal_637439472,rbal_637438986,rbal_637439345	type I restriction-modification system DNA methylase::type I restriction enzym, M protein::type I restriction enzyme M protein::type I restriction enzyme StySPI M protein::probable Type I restriction enzyme EcoEI M protein-Escherichia coli
rbal_NCIM00100	5	rbal_637439214,rbal_637435640,rbal_637435641,rbal_637439210,rbal_637439212	conserved hypothetical protein-putative universal stress protein::hypothetical protein::hypothetical protein::conserved hypothetical protein-putative universal stress protein::hypothetical protein
rbal_NCIM00101	5	rbal_637432997,rbal_637433259,rbal_637435953,rbal_637439532,rbal_637438206	helicase::probable DEAH ATP-dependent helicase::helicase, Snf2 family::swi/snf family helicase_2::probable swi/snf family helicase 2
rbal_NCIM00102	5	rbal_637435389,rbal_637440300,rbal_637434378,rbal_637436476,rbal_637434383	hypothetical protein::hypothetical protein::hypothetical protein::hypothetical protein::hypothetical protein
rbal_NCIM00103	5	rbal_637435853,rbal_637437384,rbal_637433189,rbal_637439650,rbal_637433502	similar to mitochondrial glycerol-3-phosphate dehydrogenase::similar to NADH-dependant oxidoreductase::probable xanthan lyase::probable secreted protein-putative xanthan lyase related::hypothetical protein
rbal_NCIM00104	5	rbal_637437394,rbal_637437802,rbal_637439247,rbal_637438041,rbal_637438262	probable RNA polymerase sigma factor nccH::probable ECF sigma factor::probable extracytoplasmic function alternative sigma factor::probable RNA polymerase sigma-H factor::probable RNA polymerase sigma factor Y
rbal_NCIM00105	5	rbal_637433495,rbal_637435411,rbal_637435409,rbal_637433515,rbal_637433489	hypothetical protein::hypothetical protein-transmembrane region and signal peptide prediction::hypothetical protein::hypothetical protein::hypothetical protein-transmembrane prediction
rbal_NCIM00106	5	rbal_637435101,rbal_637438419,rbal_637435785,rbal_637435923,rbal_637434720	hypothetical protein::hypothetical protein::hypothetical protein::hypothetical protein::hypothetical protein
rbal_NCIM00107	5	rbal_637434170,rbal_637438127,rbal_637433998,rbal_637433960,rbal_637439814	flavohemoprotein::ferredoxin::probable bacterial hemoglobin::Na(+)-translocating NADH-quinone reductase subunit F::HMP
rbal_NCIM00108	5	rbal_637434598,rbal_637440327,rbal_637438435,rbal_637436129,rbal_637436297	cell division protein FtsH::AAA superfamily ATPase::putative ATPase::cell division protein FtsH::cell division protein FtsH homolog
rbal_NCIM00109	5	rbal_637439703,rbal_637438946,rbal_637433606,rbal_637436512,rbal_637435162	probable tolQ-type transport protein::probable TolQ::probable biopolymer transport ExbB-related protein::probable TolQ-type transport protein::probable tolQ protein
rbal_NCIM00110	5	rbal_637438245,rbal_637439294,rbal_637438463,rbal_637435686,rbal_637435126	probable transposase::hypothetical protein-transmembrane prediction::probable transposase::probable transposase::probable transposase
rbal_NCIM00111	5	rbal_637433045,rbal_637436266,rbal_637437977,rbal_637437945,rbal_637433043	probable alkaline phosphatase D::probable alkaline phosphatase D::alkaline phosphatase D::probable secreted alkaline phosphatase (fragment)::probable alkaline phosphatase D
rbal_NCIM00112	5	rbal_637438058,rbal_637438923,rbal_637434704,rbal_637433927,rbal_637433904	probable membrane protein::conserved hypothetical protein-putative archaeal protein::60 kDa outer membrane protein, serovars L1/L2/L3::60 kDa outer membrane protein::probable 60 kDa outer membrane protein (precursor)
rbal_NCIM00113	5	rbal_637433507,rbal_637433519,rbal_637433518,rbal_637433509,rbal_637433834	hypothetical protein::hypothetical protein::hypothetical protein::hypothetical protein::hypothetical protein
rbal_NCIM00114	5	rbal_637440360,rbal_637438706,rbal_637438330,rbal_637435020,rbal_637435782	probable oxidoreductase-putative hydrolase involved in aromatic ring cleavage::haloalkane dehalogenase::putative hydrolase::Non-heme chloroperoxidase::probable ephA protein-Mycobacterium tuberculosis (strain H37RV)
rbal_NCIM00115	5	rbal_637435304,rbal_637433085,rbal_637439469,rbal_637438995,rbal_637433243	hypothetical protein::hypothetical protein::hypothetical protein::hypothetical protein::hypothetical protein
rbal_NCIM00116	5	rbal_637433429,rbal_637434320,rbal_637433679,rbal_637435262,rbal_637435248	putative transposase::H repeat-associated protein-putative transposase::putative transposase::H repeat-associated protein ydcC::H repeat-associated protein ydcC
rbal_NCIM00117	5	rbal_637440152,rbal_637436014,rbal_637439168,rbal_637435396,rbal_637438149	hypothetical protein::hypothetical protein::hypothetical protein::hypothetical protein::hypothetical protein
rbal_NCIM00118	5	rbal_637439686,rbal_637436447,rbal_637433110,rbal_637434504,rbal_637438381	probable oxidoreductase::oxidoreductase Tas, aldo/keto reductase family::putative oxidoreductase-possibly Aldo/keto reductase::general stress protein 69::dTDP-4-keto-L-6-deoxy-hexose 2,3-reductase-putative a NADP-dependent oxidoreductase
rbal_NCIM00119	7	rbal_637435173,rbal_637433079,rbal_637433882,rbal_637434297,rbal_637438639,rbal_637435366,rbal_637433474	hypothetical protein::lipoprotein receptor-related protein::hypothetical protein::conserved hypothetical protein-putative glucosesorbosone dehydrogenase::protein up-regulated by thyroid hormone-putative PQQ-dependent glucose dehydrogenase::hypothetical protein::fat protein-possibly involved in cell-cell attachment
rbal_NCIM00120	6	rbal_637434439,rbal_637440102,rbal_637433938,rbal_637437046,rbal_637436606,rbal_637435775	hypothetical protein::conserved hypothetical protein-putative EAL domain protein::conserved hypothetical protein-FHA-domain-containing protein::conserved hypothetical protein-putative regulatory protein::conserved hypothetical protein-putative FHA domain::similar to adenylate cyclase
rbal_NCIM00121	4	rbal_637438564,rbal_637437957,rbal_637436592,rbal_637436506	phosphoglycerate dehydrogenase SerA2-putative NAD-dependent 2-hydroxyacid dehydrogenase::D-lactate dehydrogenase::probable 2-hydroxyacid dehydrogenase::phosphoglycerate dehydrogenase
rbal_NCIM00122	4	rbal_637435202,rbal_637434691,rbal_637433617,rbal_637434382	hypothetical protein::hypothetical protein::hypothetical protein::hypothetical protein
rbal_NCIM00123	4	rbal_637435420,rbal_637435432,rbal_637436775,rbal_637437335	hypothetical protein::hypothetical protein::hypothetical protein::hypothetical protein
rbal_NCIM00124	4	rbal_637435219,rbal_637436732,rbal_637437938,rbal_637438320	probable endo-1,4-beta-xylanase Z::hypothetical protein::probable endo-1,4-beta-xylanase 1 precursor::conserved hypothetical protein-putative a hydrolase
rbal_NCIM00125	4	rbal_637440305,rbal_637438596,rbal_637438377,rbal_637436836	sialic-acid O-acetylesterase::sialic acid-specific 9-O-acetylesterase::sialic acid-specific 9-O-acetylesterase::sialic acid-specific 9-O-acetylesterase
rbal_NCIM00126	4	rbal_637433818,rbal_637438126,rbal_637435421,rbal_637437747	hypothetical 49.9 kDa protein Y4YA-putative diaminopimelate decarboxylase::diaminopimelate decarboxylase::probable diaminopimelate decarboxylase::lysine/ornithine decarboxylase
rbal_NCIM00127	4	rbal_637439981,rbal_637438265,rbal_637434793,rbal_637437439	hypothetical protein::hypothetical protein-transmembrane prediction::hypothetical protein-signal peptide and transmembrane prediction::hypothetical protein-signal peptide and transmembrane prediction
rbal_NCIM00128	4	rbal_637434114,rbal_637434760,rbal_637436645,rbal_637440172	ribosomal large subunit pseudouridine synthase A::ribosomal large subunit pseudouridine synthase D::ribosomal large subunit pseudouridine synthase D::ribosomal large subunit pseudouridine synthase
rbal_NCIM00129	4	rbal_637436184,rbal_637436869,rbal_637434865,rbal_637437357	hypothetical protein-signal peptide and transmembrane prediction::hypothetical protein::hypothetical protein::hypothetical protein-transmembrane prediction
rbal_NCIM00130	4	rbal_637438255,rbal_637439903,rbal_637437215,rbal_637436994	hypothetical protein containing vWFA domain::hypothetical protein::conserved hypothetical protein-putative chloride channel::conserved hypothetical protein-containing vWFA domain
rbal_NCIM00131	4	rbal_637436358,rbal_637434894,rbal_637437123,rbal_637439059	D-ribose-binding periplasmic protein::ribose ABC transporter, periplasmic ribose-binding protein rbsB::bifunctional carbohydrate binding and transport protein::sugar ABC transporter, periplasmic sugar-binding protein
rbal_NCIM00132	4	rbal_637439176,rbal_637435704,rbal_637439101,rbal_637439389	hypothetical protein::hypothetical protein::hypothetical protein::hypothetical protein
rbal_NCIM00133	4	rbal_637434928,rbal_637434365,rbal_637434803,rbal_637433718	glucosamine-6-phosphate deaminase::glucosamine-6-phosphate isomerase::Glucosamine-6-phosphate isomerase 2::6-phosphogluconolactonase
rbal_NCIM00134	4	rbal_637438998,rbal_637437737,rbal_637437437,rbal_637438117	conserved hypothetical protein-putative alkyl hydroperoxide reductase::hypothetical protein::conserved hypothetical protein-putative secreted protein::conserved hypothetical protein-putative thiol-disulfide isomerase or thioredoxin
rbal_NCIM00135	4	rbal_637438244,rbal_637438462,rbal_637435685,rbal_637435125	hypothetical protein::hypothetical protein::hypothetical protein::hypothetical protein
rbal_NCIM00136	4	rbal_637435809,rbal_637433559,rbal_637434604,rbal_637438453	nitrogen regulatory protein P-II::nitrogen regulatory protein P-II::nitrogen regulatory protein P-II::nitrogen regulatory protein P-II
rbal_NCIM00137	4	rbal_637435909,rbal_637435166,rbal_637437699,rbal_637436532	carbamoyl-phosphate synthase small subunit::anthranilate synthase component II::GMP synthase::anthranilate synthase component II (glutamine amido-transferase)
rbal_NCIM00138	4	rbal_637436234,rbal_637436235,rbal_637438085,rbal_637434291	probable chaperone protein DnaK::probable chaperone protein DnaK::DnaK protein::chaperone protein HscC
rbal_NCIM00139	4	rbal_637433555,rbal_637438210,rbal_637433038,rbal_637438558	hypothetical protein::hypothetical protein::hypothetical protein::hypothetical protein
rbal_NCIM00140	4	rbal_637435552,rbal_637434482,rbal_637434809,rbal_637437924	dihydrodipicolinate synthase::dihydrodipicolinate synthase::probable N-acetylneuraminate lyase::dihydrodipicolinate synthase DapA
rbal_NCIM00141	4	rbal_637438447,rbal_637438446,rbal_637438445,rbal_637437391	hypothetical protein::hypothetical protein::hypothetical protein::hypothetical protein
rbal_NCIM00142	4	rbal_637439040,rbal_637439041,rbal_637439042,rbal_637439037	hypothetical protein::hypothetical protein::hypothetical protein::hypothetical protein
rbal_NCIM00143	4	rbal_637439513,rbal_637439521,rbal_637439520,rbal_637439516	hypothetical protein::hypothetical protein::hypothetical protein::hypothetical protein
rbal_NCIM00144	4	rbal_637435687,rbal_637438246,rbal_637435127,rbal_637438464	hypothetical protein::hypothetical protein-signal peptide prediction::hypothetical protein::hypothetical protein
rbal_NCIM00145	4	rbal_637439695,rbal_637437287,rbal_637436203,rbal_637439697	glycolate oxidase subunit GlcD::conserved hypothetical protein-putative Fe-S containing oxidoreductase::putative oxidase::glycolate oxidase, iron-sulfur subunit
rbal_NCIM00146	4	rbal_637436790,rbal_637434084,rbal_637436872,rbal_637440388	hypothetical protein::similar to O-GlcNAc transferase::similar to acyl-CoA thioesterase I::hypothetical protein-transmembrane prediction
rbal_NCIM00147	4	rbal_637434054,rbal_637438847,rbal_637434370,rbal_637434787	30S ribosomal protein S1::conserved hypothetical protein-putative RNA-binding protein::30S ribosomal protein S1::conserved hypothetical protein-putative RNA binding protein
rbal_NCIM00148	4	rbal_637435725,rbal_637439048,rbal_637437635,rbal_637440364	lysine--tRNA ligase genX::lysyl-tRNA synthetase::Aspartyl-tRNA synthetase::asparaginyl-tRNA synthetase
rbal_NCIM00149	4	rbal_637438696,rbal_637438694,rbal_637438695,rbal_637435728	hypothetical protein::hypothetical protein::hypothetical protein::hypothetical protein
rbal_NCIM00150	4	rbal_637435428,rbal_637438091,rbal_637437787,rbal_637438509	proteinase I::conserved hypothetical protein-putative intracellular proteinase::intracellular proteinase pfpI::probable intracellular proteinase I
rbal_NCIM00151	4	rbal_637439683,rbal_637435061,rbal_637436034,rbal_637437919	xylulose kinase::glycerol kinase::carbohydrate kinase, FGGY family::ribulokinase
rbal_NCIM00152	4	rbal_637437408,rbal_637436842,rbal_637437615,rbal_637437313	probable transaminase::aspartate aminotransferase::aspartate aminotransferase::histidinol-phosphate aminotransferase
rbal_NCIM00153	4	rbal_637433855,rbal_637434091,rbal_637440190,rbal_637437865	putative esterase::D-aminoacylase::conserved hypothetical protein-putative beta-lactamase or penicillin-binding protein::probable beta-lactamase
rbal_NCIM00154	4	rbal_637434897,rbal_637433562,rbal_637438230,rbal_637436356	ribose transport system permease protein rbsC::ribose transport system permease protein::ribose ABC transporter permease protein::ribose transport system permease protein RbsC
rbal_NCIM00155	4	rbal_637435024,rbal_637435025,rbal_637439192,rbal_637433672	hypothetical protein::hypothetical protein::xenobiotic reductase B::NADH:flavin oxidoreductase
rbal_NCIM00156	4	rbal_637439677,rbal_637437516,rbal_637439574,rbal_637436137	conserved hypothetical protein-putative transcriptional regulator::hypothetical protein::hypothetical protein::hypothetical protein
rbal_NCIM00157	4	rbal_637434868,rbal_637437847,rbal_637436520,rbal_637437081	peptidyl-prolyl cis-trans isomerase cyp2::peptidylprolyl isomerase::probable cyclophilin type peptidylprolyl isomerase::peptidylprolyl isomerase
rbal_NCIM00158	4	rbal_637439952,rbal_637433891,rbal_637436879,rbal_637437556	hypothetical protein-signal peptide and transmembrane prediction::hypothetical protein-signal peptide and transmembrane prediction::hypothetical protein::hypothetical protein-signal peptide and transmembrane prediction
rbal_NCIM00159	4	rbal_637435724,rbal_637434057,rbal_637438366,rbal_637439984	delta-9 desaturase::delta 9 acyl-lipid fatty acid desaturase::delta-9 desaturase::fatty-acid desaturase
rbal_NCIM00160	4	rbal_637439343,rbal_637439340,rbal_637439474,rbal_637438987	type I restriction enzyme EcoAI R protein::putative helicase::type I restriction enzyme, R protein::type I restriction enzyme EcoKI R protein
rbal_NCIM00161	4	rbal_637439235,rbal_637438008,rbal_637438601,rbal_637434910	probable metal-dependent regulatory protein::probable transcription regulator::probable transcription regulator::probable ArsR-family transcriptional regulator
rbal_NCIM00162	4	rbal_637437338,rbal_637436492,rbal_637437816,rbal_637436259	probable fructose specific permease-possibly phosphotransferase system component::hypothetical protein::PTS system, fructose-specific enzyme II, BC component::probable PTS system, fructose-specific IIABC component
rbal_NCIM00163	4	rbal_637439897,rbal_637435703,rbal_637439972,rbal_637436586	hypothetical protein::probable membrane protein::probable membrane protein::hypothetical protein
rbal_NCIM00164	4	rbal_637436849,rbal_637437097,rbal_637434775,rbal_637437838	probable glutamate-1-semialdehyde 2,1-aminomutase::diaminobutyrate--2-oxoglutarate aminotransferase::adenosylmethionine-8-amino-7-oxononanoate aminotransferase::probable acetylornithine aminotransferase
rbal_NCIM00165	4	rbal_637439236,rbal_637436186,rbal_637439238,rbal_637439207	hypothetical protein::probable molybdopterin-synthase sulfurylase::hypothetical protein::hypothetical protein
rbal_NCIM00166	4	rbal_637435970,rbal_637438918,rbal_637437336,rbal_637438309	hypothetical protein::hypothetical protein::hypothetical protein::hypothetical protein
rbal_NCIM00167	4	rbal_637434323,rbal_637434328,rbal_637438152,rbal_637434338	hypothetical protein::hypothetical protein::probable nodulation protein noeI-putative methyltransferase::conserved hypothetical protein-putative methyltransferase
rbal_NCIM00168	4	rbal_637437634,rbal_637433390,rbal_637439189,rbal_637436273	carboxymethylenebutenolidase::putative carboxymethylenebutenolidase::putative hydrolase::probable dienelactone hydrolase
rbal_NCIM00169	4	rbal_637439512,rbal_637439518,rbal_637439519,rbal_637439515	hypothetical protein::hypothetical protein::hypothetical protein::hypothetical protein
rbal_NCIM00170	4	rbal_637438586,rbal_637440175,rbal_637436111,rbal_637434804	hypothetical protein::hypothetical protein::hypothetical protein::hypothetical protein
rbal_NCIM00171	4	rbal_637434068,rbal_637435231,rbal_637440350,rbal_637437246	hypothetical protein::hypothetical protein-signal peptide and transmembrane prediction::hypothetical protein::hypothetical protein
rbal_NCIM00172	5	rbal_637439400,rbal_637437274,rbal_637439151,rbal_637438285,rbal_637439108	probable transcription regulator MarR/EmrR family::probable transcription regulator marR family::probable MarR-family regulatory protein::hypothetical 161 kDa transcriptional regulator::probable marR-family transcription regulator
rbal_NCIM00173	3	rbal_637437387,rbal_637436229,rbal_637436909	adenylate cyclase 1::probable adenylate cyclase::adenylate cyclase 1
rbal_NCIM00174	3	rbal_637436975,rbal_637440022,rbal_637434021	probable DNA-directed RNA polymerase alpha chain::DNA-directed RNA polymerase alpha subunit::probable DNA-directed RNA polymerase alpha chain
rbal_NCIM00175	3	rbal_637439796,rbal_637433316,rbal_637438217	hypothetical protein::hypothetical protein::hypothetical protein
rbal_NCIM00176	3	rbal_637433598,rbal_637436340,rbal_637440257	hypothetical protein::secretion system protein TadB::probable protein secretion system or pilus assembly related protein TadB
rbal_NCIM00177	3	rbal_637439750,rbal_637437161,rbal_637434718	periplasmic tail-specific proteinase::carboxyl-terminal proteinase::carboxyl-terminal processing protease
rbal_NCIM00178	3	rbal_637437567,rbal_637433972,rbal_637437869	probable transcription regulator GntR related protein ytrA::transcription regulator GntR related protein ytrA::transcription regulator GntR related protein ytrA
rbal_NCIM00179	3	rbal_637438241,rbal_637437270,rbal_637438240	hypothetical zinc protease::probable proteinase::hypothetical zinc protease
rbal_NCIM00180	3	rbal_637438820,rbal_637437570,rbal_637437031	probable beta-hydroxyacyl-ACP dehydratase::probable beta-hydroxyacyl-ACP dehydratase::probable hydroxymyristoyl-(acyl carrier protein) dehydratase
rbal_NCIM00181	3	rbal_637436500,rbal_637440011,rbal_637434318	probable hexosyltransferase::similar to hexosyltransferase::probable hexosyltransferase
rbal_NCIM00182	3	rbal_637439907,rbal_637437939,rbal_637435447	cytosine deaminase::cytosine deaminase::probable cytidine and deoxycytidylate deaminase family protein
rbal_NCIM00183	3	rbal_637439318,rbal_637439320,rbal_637437373	similar to transcription regulator::hypothetical protein::conserved hypothetical protein-putative transcriptional regulator
rbal_NCIM00184	3	rbal_637437864,rbal_637439031,rbal_637439174	chloromuconate cycloisomerase YkfB1::muconate cycloisomerase I::chloromuconate cycloisomerase YkfB1
rbal_NCIM00185	3	rbal_637440255,rbal_637433595,rbal_637435906	probable chromosome partitioning ATPase::hypothetical protein::probable pilus assembly protein CpaE
rbal_NCIM00186	3	rbal_637438517,rbal_637436738,rbal_637439887	hypothetical protein-transmembrane prediction::hypothetical protein::hypothetical protein
rbal_NCIM00187	3	rbal_637438088,rbal_637434879,rbal_637434764	DNA gyrase subunit B::DNA gyrase subunit B::DNA gyrase subunit B
rbal_NCIM00188	3	rbal_637434205,rbal_637440240,rbal_637434660	hypothetical protein::hypothetical protein-transmembrane prediction::hypothetical protein
rbal_NCIM00189	3	rbal_637439765,rbal_637439766,rbal_637439965	flagellar hook basal body protein flgG::FlgF::flagellar hook protein FlgE
rbal_NCIM00190	3	rbal_637435059,rbal_637438557,rbal_637436507	hypothetical protein::hypothetical protein-putative transmembrane protein::hypothetical protein
rbal_NCIM00191	3	rbal_637434886,rbal_637438867,rbal_637438235	hypothetical protein-putative general secretory pathway protein::hypothetical protein-putative GSP protein::hypothetical protein-signal peptide and transmembrane prediction
rbal_NCIM00192	3	rbal_637435541,rbal_637440007,rbal_637439255	phosphatidate cytidylyltransferase::phosphatidate cytidylyltransferase::phosphatidate cytidylyltransferase
rbal_NCIM00193	3	rbal_637439573,rbal_637439596,rbal_637439597	hypothetical protein::hypothetical protein::hypothetical protein
rbal_NCIM00194	3	rbal_637438903,rbal_637438017,rbal_637438019	heat shock protein GroEL::60 kDa chaperonin::60 kDa chaperonin 5
rbal_NCIM00195	3	rbal_637433784,rbal_637439723,rbal_637439629	dihydroxy-acid dehydratase::dihydroxy-acid dehydratase::hypothetical protein
rbal_NCIM00196	3	rbal_637436164,rbal_637434154,rbal_637434203	probable partitioning or sporulation protein ParA::probable chromosome partitioning ATPase, ParA family::chromosome partitioning protein parA
rbal_NCIM00197	3	rbal_637437275,rbal_637439401,rbal_637439414	probable alkyl sulfatase or beta-lactamase::alkyl sulfatase or beta-lactamase::alkyl sulfatase or beta-lactamase
rbal_NCIM00198	3	rbal_637438713,rbal_637437582,rbal_637437260	probable CsrA_thema carbon storage regulator homolog::probable carbon storage regulator::probable global regulator
rbal_NCIM00199	3	rbal_637435553,rbal_637436316,rbal_637440321	probable protein disulfide-isomerase::probable protein disulfide-isomerase::probable thiol:disulfide interchange protein
rbal_NCIM00200	3	rbal_637437819,rbal_637434034,rbal_637434616	phosphoenolpyruvate-protein phosphotransferase::pyruvate phosphate dikinase::phosphoenolpyruvate-protein phosphotransferase
rbal_NCIM00201	3	rbal_637435734,rbal_637433181,rbal_637436567	cadmium-transporting ATPase::copper-transporting ATPase::probable cation-transporting P-type ATPase
rbal_NCIM00202	3	rbal_637434384,rbal_637433454,rbal_637437310	L-lactate dehydrogenase::L-lactate/malate dehydrogenase::malate dehydrogenase
rbal_NCIM00203	3	rbal_637435431,rbal_637440188,rbal_637434650	hypothetical protein::hypothetical protein::hypothetical protein
rbal_NCIM00204	3	rbal_637438578,rbal_637438580,rbal_637434975	conserved hypothetical protein-putative protease::conserved hypothetical protein-putative protease::hypothetical protein
rbal_NCIM00205	3	rbal_637433810,rbal_637436901,rbal_637436899	hypothetical protein::hypothetical protein::hypothetical protein
rbal_NCIM00206	3	rbal_637439473,rbal_637439346,rbal_637439490	type I restriction modification enzyme, S subunit::probable Type I restriction enzyme EcoBI specificity protein::restriction modification system S chain homolog
rbal_NCIM00207	3	rbal_637440267,rbal_637440270,rbal_637438602	conserved hypothetical protein-putative cobalamin synthesis protein CobW::conserved hypothetical protein-putative cobalamin synthesis protein CobW::conserved hypothetical protein-putative containing GTP-binding domain
rbal_NCIM00208	3	rbal_637433506,rbal_637437636,rbal_637438313	amino acid transporter::cationic amino acid transporter (cat-1)::amino acid permease homolog ykbA
rbal_NCIM00209	3	rbal_637440012,rbal_637436729,rbal_637438805	Cps2E::probable capsular polysaccharide biosynthesis glycosyltransferase::UDP-galactose-lipid carrier transferase
rbal_NCIM00210	3	rbal_637436935,rbal_637437585,rbal_637435010	hypothetical protein::conserved hypothetical protein-putative a transcriptional regulator::hypothetical protein
rbal_NCIM00211	3	rbal_637435050,rbal_637435463,rbal_637436937	flagellin E::flagellin::flagellin
rbal_NCIM00212	3	rbal_637435673,rbal_637433520,rbal_637433508	hypothetical protein::hypothetical protein-signal peptide and transmembrane prediction::hypothetical protein-transmembrane prediction
rbal_NCIM00213	3	rbal_637434701,rbal_637434197,rbal_637438644	hypothetical protein::hypothetical protein::hypothetical protein
rbal_NCIM00214	3	rbal_637437155,rbal_637436464,rbal_637434758	hypothetical protein::hypothetical protein::similar to glyoxylase I family protein
rbal_NCIM00215	3	rbal_637435837,rbal_637435838,rbal_637436914	hypothetical protein::hypothetical protein::hypothetical protein
rbal_NCIM00216	3	rbal_637439523,rbal_637433075,rbal_637434046	translocase::translocase::translocase
rbal_NCIM00217	3	rbal_637439481,rbal_637433246,rbal_637438993	hypothetical protein::hypothetical protein::hypothetical protein
rbal_NCIM00218	3	rbal_637435429,rbal_637434976,rbal_637438333	probable macrophage infectivity potentiator protein Mip::hypothetical protein::probable Mip
rbal_NCIM00219	3	rbal_637439315,rbal_637439430,rbal_637439429	probable N-acetylgalactosaminyltransferase::probable beta-1,4 N-acetylgalactosaminyltransferase::probable N-acetylgalactosaminyltransferase
rbal_NCIM00220	3	rbal_637438579,rbal_637438582,rbal_637438581	hypothetical protein::hypothetical protein::hypothetical protein
rbal_NCIM00221	3	rbal_637440363,rbal_637433838,rbal_637437277	glutamyl-tRNA synthetase-related protein::glutaminyl-tRNA synthetase::glutamyl-tRNA synthetase
rbal_NCIM00222	3	rbal_637435269,rbal_637437717,rbal_637439166	probable secreted protein::probable secreted protein::probable secreted protein
rbal_NCIM00223	3	rbal_637436480,rbal_637433549,rbal_637437724	transcription-repair coupling factor::ATP-dependent DNA helicase RecG::primosomal protein N
rbal_NCIM00224	3	rbal_637433208,rbal_637440216,rbal_637440047	molybdopterin oxidoreductase, iron sulfur subunit::putative oxidoreductase, Fe-S subunit::molybdopterin oxidoreductase, iron-sulfur binding subunit
rbal_NCIM00225	3	rbal_637438787,rbal_637434310,rbal_637436855	similar to type 8 capsule gene Cap8B::capsular polysaccharide biosynthesis homolog::probable exopolysaccharide polymerization protein
rbal_NCIM00226	3	rbal_637433372,rbal_637436312,rbal_637435371	hypothetical protein::hypothetical protein::hypothetical protein
rbal_NCIM00227	3	rbal_637438775,rbal_637437509,rbal_637439937	hypothetical protein::hypothetical protein::hypothetical protein
rbal_NCIM00228	3	rbal_637438902,rbal_637438018,rbal_637433148	GroES/HSP10 homolog::10 kDa chaperonin::probable GroES chaperonin
rbal_NCIM00229	3	rbal_637437755,rbal_637433317,rbal_637433315	hypothetical protein::hypothetical protein::hypothetical protein
rbal_NCIM00230	3	rbal_637433909,rbal_637436213,rbal_637436199	beta-alanine synthetase::predicted amidohydrolase::beta-alanine synthetase
rbal_NCIM00231	3	rbal_637438616,rbal_637434199,rbal_637434881	putative transposase::probable transposase::putative transposase
rbal_NCIM00232	3	rbal_637440153,rbal_637435397,rbal_637436115	hypothetical protein::hypothetical protein::hypothetical protein
rbal_NCIM00233	3	rbal_637438200,rbal_637433478,rbal_637433475	probable fibrinogen-binding protein homolog-putative involved in cell-cell interaction::hypothetical protein::probable fibrinogen-binding protein homolog
rbal_NCIM00234	3	rbal_637437172,rbal_637436364,rbal_637440380	aspartate carbamoyltransferase::ornithine carbamoyltransferase::aspartate carbamoyltransferase, catalytic subunit (pyrB)
rbal_NCIM00235	3	rbal_637439580,rbal_637438196,rbal_637437777	hypothetical protein-signal peptide prediction::hypothetical protein-signal peptide and transmembrane prediction::hypothetical protein-transmembrane prediction
rbal_NCIM00236	3	rbal_637436175,rbal_637433813,rbal_637438808	putative methyltransferase::hypothetical methyltransferase::probable methyltransferase or Fe-S oxidoreductase
rbal_NCIM00237	3	rbal_637437881,rbal_637433368,rbal_637438390	hypothetical protein-transmembrane prediction::hypothetical protein::hypothetical protein
rbal_NCIM00238	3	rbal_637439745,rbal_637438239,rbal_637439046	hypothetical protein::probable MiaB protein-putative tRNA-thiotransferase::conserved hypothetical protein-putative 2-methylthioadenine synthetase
rbal_NCIM00239	3	rbal_637436501,rbal_637435770,rbal_637438600	hypothetical protein-transmembrane prediction::hypothetical protein-transmembrane prediction::similar to Cap5J protein-putative transmembraneprotein
rbal_NCIM00240	3	rbal_637437899,rbal_637435675,rbal_637437900	hypothetical protein-signal peptide and transmembrane prediction::hypothetical protein-transmembrane prediction::hypothetical protein
rbal_NCIM00241	3	rbal_637435376,rbal_637435695,rbal_637439283	conserved hypothetical protein-putative transposase::hypothetical protein::transposase homolog
rbal_NCIM00242	3	rbal_637437036,rbal_637434117,rbal_637436334	polyprenyl synthase::geranylgeranyl pyrophosphate synthetase::polyprenyl synthetase
rbal_NCIM00243	3	rbal_637437616,rbal_637436623,rbal_637436622	O-acetylhomoserine sulfhydrylase::cystathionine gamma-lyase homolog::cystathionine gamma-synthase
rbal_NCIM00244	3	rbal_637437377,rbal_637434133,rbal_637440292	hypothetical protein-transmembrane prediction::hypothetical protein-transmembrane prediction::hypothetical protein-transmembrane prediction
rbal_NCIM00245	3	rbal_637435027,rbal_637434610,rbal_637436181	probable transcription regulator, HTH_1 family::hydrogen peroxide-inducible genes activator::probable transcription regulator
rbal_NCIM00246	3	rbal_637438663,rbal_637435423,rbal_637436903	cysteine synthase B::cysteine synthase::cysteine synthase (O-acetylserine sulfhydrylase)
rbal_NCIM00247	3	rbal_637438514,rbal_637439305,rbal_637434140	probable transposase::probable transposase::transposase
rbal_NCIM00248	3	rbal_637433235,rbal_637436200,rbal_637433746	inositol-1-monophosphatase::inositol-1-monophosphatase::inositol monophosphatase family protein
rbal_NCIM00249	3	rbal_637434600,rbal_637434487,rbal_637433195	phosphatidylethanolamine N-methyltransferase::ubiquinone/menaquinone biosynthesis methyltransferase::probable ubiquinone/menaquinone biosynthesis methyltransferase
rbal_NCIM00250	3	rbal_637436517,rbal_637440127,rbal_637436191	3-oxoacyl-(acyl carrier protein) synthase::3-oxoacyl-(acyl carrier protein) synthase::3-oxoacyl-(acyl-carrier-protein) synthase III
rbal_NCIM00251	3	rbal_637433697,rbal_637433864,rbal_637434927	probable transcription repressor::glucokinase::probable glucokinase
rbal_NCIM00252	3	rbal_637435998,rbal_637439876,rbal_637436812	probable helicase::ATP-dependent DNA helicase::ATP-dependent DNA helicase
rbal_NCIM00253	3	rbal_637433707,rbal_637438866,rbal_637436707	hypothetical protein-signal peptide prediction::similar to calmodulin-like protein-putative secreted, membrane associated or paryphoplasmic Ca(2+)-binding protein::hypothetical protein
rbal_NCIM00254	3	rbal_637439471,rbal_637439488,rbal_637438216	hypothetical protein::hypothetical protein::hypothetical protein
rbal_NCIM00255	3	rbal_637437903,rbal_637438296,rbal_637437902	BatA::hypothetical protein::BatB
rbal_NCIM00256	3	rbal_637435971,rbal_637435972,rbal_637435214	similar to collagen alpha-2 (XI) chain::hypothetical protein-signal peptide and transmembrane prediction::hypothetical protein-signal peptide prediction
rbal_NCIM00257	3	rbal_637438640,rbal_637433187,rbal_637434742	macrophage infectivity potentiator::FKBP-type peptidyl-prolyl cis-trans isomerase::FKBP-type peptidyl-prolyl cis-trans isomerase fkpA
rbal_NCIM00258	3	rbal_637435109,rbal_637433645,rbal_637434080	dipeptidyl peptidase IV::dipeptidyl peptidase IV::X-Pro dipeptidyl-peptidase
rbal_NCIM00259	3	rbal_637435009,rbal_637435030,rbal_637433962	probable thiamin biosynthesis lipoprotein apbE::probable thiamine biosynthesis lipoprotein apbE::thiamine biosynthesis lipoprotein apbE
rbal_NCIM00260	3	rbal_637438648,rbal_637439144,rbal_637438745	sulfate permease family protein::probable sulfate transporter::probable sulfate transporter
rbal_NCIM00261	3	rbal_637434342,rbal_637439845,rbal_637434315	probable maltose O-acetyltransferase::maltose O-acetyltransferase::putative colanic acid biosynthesis acetyltransferase
rbal_NCIM00262	3	rbal_637435858,rbal_637436446,rbal_637435847	hypothetical protein::hypothetical protein::hypothetical protein
rbal_NCIM00263	3	rbal_637440258,rbal_637436341,rbal_637433599	probable integral membrane protein::probable secretion system protein TadC::probable integral membrane protein
rbal_NCIM00264	3	rbal_637439390,rbal_637439206,rbal_637439397	hypothetical protein::hypothetical protein::hypothetical protein
rbal_NCIM00265	3	rbal_637439676,rbal_637433333,rbal_637436156	conserved hypothetical protein-putative secreted protein::conserved hypothetical protein-putative xylan esterase::hypothetical protein
rbal_NCIM00266	3	rbal_637437679,rbal_637437678,rbal_637435869	hypothetical protein::hypothetical protein::hypothetical protein
rbal_NCIM00267	2	rbal_637438173,rbal_637437761	probable deoxyribodipyrimidine photolyase::deoxyribodipyrimidine photolyase
rbal_NCIM00268	2	rbal_637434613,rbal_637434615	hypothetical protein::hypothetical protein
rbal_NCIM00269	2	rbal_637436435,rbal_637435760	probable TolB protein::probable aminopeptidase
rbal_NCIM00270	2	rbal_637436249,rbal_637436432	hypothetical protein::hypothetical protein
rbal_NCIM00271	2	rbal_637438567,rbal_637436189	hypothetical protein::probable transcriptional regulator
rbal_NCIM00272	2	rbal_637436387,rbal_637436378	hypothetical protein::hypothetical protein
rbal_NCIM00273	2	rbal_637438724,rbal_637438725	heat shock protein, HSP20 family::heat shock protein SP21
rbal_NCIM00274	2	rbal_637437008,rbal_637433400	hypothetical protein::hypothetical protein-signal peptide and transmembrane prediction
rbal_NCIM00275	2	rbal_637439646,rbal_637438718	phytoene dehydrogenase::phytoene dehydrogenase
rbal_NCIM00276	2	rbal_637438413,rbal_637439394	conserved hypothetical protein-putative phospholipid-binding protein::conserved hypothetical protein-putative phospholipid-binding protein
rbal_NCIM00277	2	rbal_637436808,rbal_637436296	conserved hypothetical protein-putative peroxiredoxin::probable bacterioferritin comigratory protein (Bcp)
rbal_NCIM00278	2	rbal_637438855,rbal_637435764	UDP-3-O-(R-3-hydroxymyristoyl)-glucosamine N-acyltransferase::UDP-N-acetylglucosamine acyltransferase
rbal_NCIM00279	2	rbal_637435616,rbal_637439404	conserved hypothetical protein-putative membrane protein::hypothetical protein
rbal_NCIM00280	2	rbal_637433253,rbal_637438215	probable site-specific DNA-methyltransferase (cytosine-specific)-putative transcriptional regulator::probable modification methylase-putative transcriptional regulator
rbal_NCIM00281	2	rbal_637439200,rbal_637436345	hypothetical protein-transmembrane prediction::hypothetical protein
rbal_NCIM00282	2	rbal_637434253,rbal_637437584	hypothetical protein-transmembrane prediction::hypothetical protein-signal peptide and transmembrane prediction
rbal_NCIM00283	2	rbal_637438350,rbal_637436330	similar to serine proteinase, subtilase family::probable serine proteinase, subtilase family
rbal_NCIM00284	2	rbal_637437969,rbal_637437970	hypothetical protein::hypothetical protein
rbal_NCIM00285	2	rbal_637438740,rbal_637433585	hypothetical protein::hypothetical protein
rbal_NCIM00286	2	rbal_637438176,rbal_637438175	phytoene synthase-related protein::probable phytoene synthase
rbal_NCIM00287	2	rbal_637438859,rbal_637433197	hypothetical protein::hypothetical protein
rbal_NCIM00288	2	rbal_637440355,rbal_637440356	hypothetical protein::hypothetical protein
rbal_NCIM00289	2	rbal_637437140,rbal_637437694	peptidase T::peptidase, M20A family
rbal_NCIM00290	2	rbal_637435536,rbal_637440381	asparagine synthetase::asparagine synthetase
rbal_NCIM00291	2	rbal_637439105,rbal_637439422	conserved hypothetical protein-putative phosphohydrolase of the HD superfamily::hypothetical protein
rbal_NCIM00292	2	rbal_637436318,rbal_637433783	hypothetical protein-transmembrane prediction::hypothetical protein-transmembrane prediction
rbal_NCIM00293	2	rbal_637437565,rbal_637433974	hypothetical protein-putative transmembrane protein::hypothetical protein-signal peptide and transmembrane prediction
rbal_NCIM00294	2	rbal_637439196,rbal_637434265	probable outer membrane protein::probable outer membrane lipoprotein IbeB
rbal_NCIM00295	2	rbal_637440361,rbal_637438108	hypothetical protein::hypothetical protein
rbal_NCIM00296	2	rbal_637435328,rbal_637439413	hypothetical protein::hypothetical protein
rbal_NCIM00297	2	rbal_637439592,rbal_637439610	peptide methionine sulfoxide reductase::methionine sulfoxide reductase A
rbal_NCIM00298	2	rbal_637438434,rbal_637440323	putative subtilisin proteinase-like protein::putative subtilisin proteinase-like protein
rbal_NCIM00299	2	rbal_637435179,rbal_637434739	sodium/sulfate symporter::probable transporter
rbal_NCIM00300	2	rbal_637437684,rbal_637437686	hypothetical protein::hypothetical protein
rbal_NCIM00301	2	rbal_637440286,rbal_637440287	hypothetical protein::probable nitrogen regulation protein
rbal_NCIM00302	2	rbal_637435636,rbal_637435646	dihydroorotate dehydrogenase::dihydroorotate dehydrogenase
rbal_NCIM00303	2	rbal_637439578,rbal_637435082	stage III sporulation protein E::ATP-binding protein
rbal_NCIM00304	2	rbal_637436285,rbal_637439257	probable DnaK suppressor protein::probable dnaK (dksA-like) supressor protein
rbal_NCIM00305	2	rbal_637435664,rbal_637435559	probable protein hesB::conserved hypothetical protein-putative hesB family protein
rbal_NCIM00306	2	rbal_637434937,rbal_637437397	hypothetical protein::hypothetical protein
rbal_NCIM00307	2	rbal_637439499,rbal_637438737	probable transmembrane transport protein::xylose transporter
rbal_NCIM00308	2	rbal_637439395,rbal_637438415	hypothetical protein-transmembrane prediction::hypothetical protein-transmembrane prediction
rbal_NCIM00309	2	rbal_637439398,rbal_637439229	conserved hypothetical protein-putative acetyltransferase::hypothetical acetyltransferase yjhQ
rbal_NCIM00310	2	rbal_637438427,rbal_637437897	dihydroorotate dehydrogenase::dihydroorotate dehydrogenase
rbal_NCIM00311	2	rbal_637436644,rbal_637438788	similar to polysaccharide biosynthesis protein::similar to polysaccharide biosynthesis protein
rbal_NCIM00312	2	rbal_637439062,rbal_637439061	probable phosphoesterase::probable phosphoesterase
rbal_NCIM00313	2	rbal_637439012,rbal_637435091	ring finger protein HAC1::hypothetical protein
rbal_NCIM00314	2	rbal_637435098,rbal_637433104	porin outer membrane protein::probable polyphosphate-selective porin O
rbal_NCIM00315	2	rbal_637437766,rbal_637437762	hypothetical protein::hypothetical protein
rbal_NCIM00316	2	rbal_637434558,rbal_637439118	hypothetical protein-signal peptide and transmembrane prediction::similar to cycloartenol synthase
rbal_NCIM00317	2	rbal_637439500,rbal_637436015	hypothetical protein::hypothetical protein
rbal_NCIM00318	2	rbal_637439462,rbal_637438637	hypothetical protein::hypothetical protein
rbal_NCIM00319	2	rbal_637437799,rbal_637438885	biotin carboxylase::pyruvate carboxylase
rbal_NCIM00320	2	rbal_637433123,rbal_637434152	conserved hypothetical protein-putative hydrolase::probable Penicillin acylase
rbal_NCIM00321	2	rbal_637439392,rbal_637438414	hypothetical protein-putative secreted, membrane associated or paryphoplasmic protein::hypothetical protein-signal peptide and transmembrane prediction
rbal_NCIM00322	2	rbal_637434712,rbal_637434711	probable integral membrane protein::probable integral membrane protein
rbal_NCIM00323	2	rbal_637437354,rbal_637436828	hypothetical protein-putative membrane bound protein::hypothetical protein
rbal_NCIM00324	2	rbal_637435457,rbal_637438488	hypothetical protein::hypothetical protein
rbal_NCIM00325	2	rbal_637434098,rbal_637435390	probable multidrug resistance protein norM::probable multi-drug efflux transporter
rbal_NCIM00326	2	rbal_637435154,rbal_637435155	hypothetical protein-signal peptide prediction::hypothetical protein-transmembrane prediction
rbal_NCIM00327	2	rbal_637440026,rbal_637434088	hypothetical protein-signal peptide and transmembrane prediction::hypothetical protein-transmembrane prediction
rbal_NCIM00328	2	rbal_637436373,rbal_637439010	ribose-5-phosphate isomerase B::ribose 5-phosphate epimerase (pentose phosphate)
rbal_NCIM00329	2	rbal_637435406,rbal_637437151	hypothetical protein::hypothetical protein
rbal_NCIM00330	2	rbal_637432995,rbal_637437621	hypothetical protein-signal peptide and transmembrane prediction::hypothetical protein-signal peptide prediction
rbal_NCIM00331	2	rbal_637433630,rbal_637433015	probable transposase::transposase
rbal_NCIM00332	2	rbal_637438095,rbal_637433637	magnesium transporter Ykok::Mg2+ transport protein
rbal_NCIM00333	2	rbal_637433638,rbal_637439998	elongation factor P::translation elongation factor EF-P
rbal_NCIM00334	2	rbal_637440013,rbal_637434949	conserved hypothetical protein-putative uncharacterized protein involved in exopolysaccharide biosynthesis::probable exopolysaccharide biosynthesis protein
rbal_NCIM00335	2	rbal_637438125,rbal_637433703	probable polysaccharide biosynthesis protein::probable polysaccharide export protein
rbal_NCIM00336	2	rbal_637438139,rbal_637434501	probable deoxyribonuclease I precursor (DNase I)::deoxyribonuclease gamma
rbal_NCIM00337	2	rbal_637438711,rbal_637435281	hypothetical protein::hypothetical protein
rbal_NCIM00338	2	rbal_637434386,rbal_637434390	similar to carbon dioxide concentrating mechanism protein CcmL::probable ethanolamine utilization protein EutN
rbal_NCIM00339	2	rbal_637439659,rbal_637437641	conserved hypothetical protein-putative acyl-CoA thioesterase::conserved hypothetical protein-putative a thioesterase
rbal_NCIM00340	2	rbal_637440040,rbal_637434099	isopropylmalate isomerase large subunit::aconitate hydratase
rbal_NCIM00341	2	rbal_637439273,rbal_637439287	hypothetical protein-transmembrane prediction::hypothetical protein-transmembrane prediction
rbal_NCIM00342	2	rbal_637439918,rbal_637439919	manganese ABC transporter permease protein::manganese ABC transporter permease protein
rbal_NCIM00343	2	rbal_637435383,rbal_637435600	hypothetical protein-transmembrane region and signal peptide prediction::hypothetical protein-signal peptide prediction
rbal_NCIM00344	2	rbal_637438704,rbal_637438020	DnaJ1 protein::chaperone protein DnaJ
rbal_NCIM00345	2	rbal_637435938,rbal_637435939	hypothetical protein-signal peptide and transmembrane prediction::hypothetical protein-signal peptide and transmembrane prediction
rbal_NCIM00346	2	rbal_637438252,rbal_637437214	similar to lipoprotein::hypothetical protein
rbal_NCIM00347	2	rbal_637435964,rbal_637433745	probable dihydrodipicolinate synthase::probable dihydrodipicolinate synthase
rbal_NCIM00348	2	rbal_637436497,rbal_637435537	hypothetical protein::hemolysin protein
rbal_NCIM00349	2	rbal_637435364,rbal_637433218	probable alkylhalidase homolog::probable alkylhalidase
rbal_NCIM00350	2	rbal_637438892,rbal_637436002	hypothetical protein::hypothetical protein
rbal_NCIM00351	2	rbal_637434425,rbal_637438258	hypothetical protein-signal peptide prediction::hypothetical protein-signal peptide prediction
rbal_NCIM00352	2	rbal_637437521,rbal_637434982	conserved hypothetical protein-putative 3-carboxymuconate cyclase::conserved hypothetical protein-putative cycloisomerase
rbal_NCIM00353	2	rbal_637436057,rbal_637438092	hypothetical protein-transmembrane prediction::hypothetical protein-transmembrane prediction
rbal_NCIM00354	2	rbal_637437343,rbal_637436550	hypothetical protein-transmembrane region and signal peptide prediction::hypothetical protein
rbal_NCIM00355	2	rbal_637437455,rbal_637434188	probable peptide methionine sulfoxide reductase msrB::peptide methionine sulfoxide reductase
rbal_NCIM00356	2	rbal_637434393,rbal_637434392	probable ethanolamine utilization protein EutM::hypothetical protein
rbal_NCIM00357	2	rbal_637438380,rbal_637434391	acetate kinase::acetate kinase
rbal_NCIM00358	2	rbal_637434279,rbal_637433359	hypothetical protein-transmembrane prediction::hypothetical protein-transmembrane prediction
rbal_NCIM00359	2	rbal_637436056,rbal_637438475	probable tungsten formylmethanofuran dehydrogenase, subunit C homolog::tungsten formylmethanofuran dehydrogenase, subunit C (fwdC)
rbal_NCIM00360	2	rbal_637439018,rbal_637439017	ATP-dependent clp protease proteolytic subunit::ATP-dependent clp protease proteolytic subunit
rbal_NCIM00361	2	rbal_637440006,rbal_637435065	3-isopropylmalate dehydrogenase::3-isopropylmalate dehydrogenase
rbal_NCIM00362	2	rbal_637435286,rbal_637434484	conserved hypothetical protein-putative oxidoreductase::hypothetical protein
rbal_NCIM00363	2	rbal_637434416,rbal_637435914	GTP-binding protein OBG::probable GTP-binding protein
rbal_NCIM00364	2	rbal_637437739,rbal_637440262	hypothetical protein::hypothetical protein
rbal_NCIM00365	2	rbal_637436159,rbal_637435150	DNA polymerase, bacteriophage-type::putative DNA polymerase related protein
rbal_NCIM00366	2	rbal_637437491,rbal_637436804	anthranilate synthase component I::para-aminobenzoate synthase component I
rbal_NCIM00367	2	rbal_637436806,rbal_637437114	probable ribosomal protein S6 modification protein::ribosomal protein S6 modification protein
rbal_NCIM00368	2	rbal_637434561,rbal_637435821	hypothetical protein::conserved hypothetical protein-putative methyltransferase
rbal_NCIM00369	2	rbal_637434167,rbal_637434168	hypothetical protein::hypothetical protein
rbal_NCIM00370	2	rbal_637437195,rbal_637433210	sulfite reductase::ferredoxin--nitrite reductase
rbal_NCIM00371	2	rbal_637438880,rbal_637437797	probable X-pro aminopeptidase homolog PepQ2::putative peptidase
rbal_NCIM00372	2	rbal_637437257,rbal_637438884	6-phosphofructokinase, pyrophosphate-dependent::diphosphate--fructose-6-phosphate 1-phosphotransferase
rbal_NCIM00373	2	rbal_637434026,rbal_637433180	hypothetical protein-signal peptide and transmembrane prediction::hypothetical protein-transmembrane prediction
rbal_NCIM00374	2	rbal_637436026,rbal_637436025	prephenate dehydrogenase::hypothetical protein
rbal_NCIM00375	2	rbal_637438083,rbal_637436803	ClpB protein::negative regulator of genetic competence ClpC/MecB
rbal_NCIM00376	2	rbal_637433850,rbal_637433852	hypothetical protein::hypothetical protein
rbal_NCIM00377	2	rbal_637433727,rbal_637440009	UDP-N-acetyl-D-mannosaminuronic acid transferase::UDP-N-acetyl-D-mannosaminuronic acid transferase
rbal_NCIM00378	2	rbal_637433725,rbal_637439834	alanine dehydrogenase::NAD(P) transhydrogenase subunit alpha
rbal_NCIM00379	2	rbal_637433641,rbal_637436684	probable aldose 1-epimerase::aldose 1-epimerase
rbal_NCIM00380	2	rbal_637437464,rbal_637437465	hypothetical protein-signal peptide and transmembrane prediction::hypothetical protein
rbal_NCIM00381	2	rbal_637440139,rbal_637437861	hypothetical protein::hypothetical protein
rbal_NCIM00382	2	rbal_637437291,rbal_637438869	probable Gnt-II system L-idonate transporter::gluconate permease gntP
rbal_NCIM00383	2	rbal_637435097,rbal_637438863	L-aspartate oxidase::succinate dehydrogenase
rbal_NCIM00384	2	rbal_637434955,rbal_637438621	ring canal kelch protein::conserved hypothetical protein containing the kelch-motif
rbal_NCIM00385	2	rbal_637439821,rbal_637439438	hypothetical protein-signal peptide and transmembrane prediction::hypothetical protein-signal peptide and transmembrane prediction
rbal_NCIM00386	2	rbal_637440342,rbal_637439338	conserved hypothetical protein-putative secreted, membrane associated or paryphoplasmic protein::hypothetical protein
rbal_NCIM00387	2	rbal_637439336,rbal_637439270	hypothetical protein::probable tspO
rbal_NCIM00388	2	rbal_637434385,rbal_637433363	L-fuculose-phosphate aldolase::probable L-fuculose-phosphate aldolase
rbal_NCIM00389	2	rbal_637435293,rbal_637440137	cell division protein FtsY::signal recognition particle protein
rbal_NCIM00390	2	rbal_637435967,rbal_637440302	similar to extracellular sucrase::conserved hypothetical protein-putative xylosidase/arabinosidase
rbal_NCIM00391	2	rbal_637437267,rbal_637436837	probable probably glycine cleavage system H protein::glycine cleavage system H protein 1
rbal_NCIM00392	2	rbal_637435834,rbal_637435870	hypothetical protein::hypothetical protein
rbal_NCIM00393	2	rbal_637436588,rbal_637436528	hypothetical protein::hypothetical protein
rbal_NCIM00394	2	rbal_637436237,rbal_637440173	conserved hypothetical protein-putative integral membrane protein::conserved hypothetical protein-putative integral membrane protein
rbal_NCIM00395	2	rbal_637437627,rbal_637436233	peroxiredoxin 2::bacterioferritin comigratory protein
rbal_NCIM00396	2	rbal_637439809,rbal_637439421	hypothetical protein::hypothetical protein
rbal_NCIM00397	2	rbal_637437299,rbal_637436640	probable sodium extrusion protein NatB::probable sodium extrusion protein NatB
rbal_NCIM00398	2	rbal_637436712,rbal_637436055	purine nucleoside phosphorylase::purine nucleoside phosphorylase
rbal_NCIM00399	2	rbal_637436691,rbal_637438185	peptide chain release factor 2 (RF-2)::peptide chain release factor 1
rbal_NCIM00400	2	rbal_637439092,rbal_637439329	conserved hypothetical protein-putative transmembrane protein::hypothetical protein
rbal_NCIM00401	2	rbal_637435650,rbal_637435158	hypothetical protein::hypothetical protein
rbal_NCIM00402	2	rbal_637437053,rbal_637436943	exinuclease ABC subunit C::excinuclease ABC subunit C
rbal_NCIM00403	2	rbal_637436225,rbal_637437572	probable branched-chain amino acid aminotransferase::branched-chain amino acid aminotransferase
rbal_NCIM00404	2	rbal_637440205,rbal_637436918	conserved hypothetical protein-putative Fe-S-oxidoreductase::conserved hypothetical protein-putative Fe-S-cluster redox enzyme
rbal_NCIM00405	2	rbal_637436917,rbal_637439454	conserved hypothetical protein-putative transcriptional regulator::conserved hypothetical protein-putative transcriptional regulator
rbal_NCIM00406	2	rbal_637437062,rbal_637437063	phosphate ABC transporter (permease)::phosphate ABC transporter (permease)
rbal_NCIM00407	2	rbal_637438992,rbal_637433247	putative ATP-binding protein::putative ATP-binding protein
rbal_NCIM00408	2	rbal_637438942,rbal_637439851	hypothetical protein-transmembrane prediction::hypothetical protein-transmembrane prediction
rbal_NCIM00409	2	rbal_637439828,rbal_637434556	conserved hypothetical protein-putative dimethyladenosine transferase (rRNA methylation)::conserved hypothetical protein-putative methyltransferase
rbal_NCIM00410	2	rbal_637434105,rbal_637439137	hypothetical protein::hypothetical protein
rbal_NCIM00411	2	rbal_637435749,rbal_637438686	ATP synthase b subunit::probable protein ATP synthase B chain
rbal_NCIM00412	2	rbal_637435747,rbal_637438683	ATP synthase subunit A::probable protein ATP synthase A chain
rbal_NCIM00413	2	rbal_637439627,rbal_637438841	conserved hypothetical protein-putative protease::conserved hypothetical protein-putative transmembrane protein
rbal_NCIM00414	2	rbal_637439009,rbal_637436656	DNA polymerase III, tau/gamma subunit::DNA polymerase III gamma and tau subunits
rbal_NCIM00415	2	rbal_637439557,rbal_637439559	hypothetical protein::hypothetical protein
rbal_NCIM00416	2	rbal_637439470,rbal_637439487	hypothetical protein::hypothetical protein
rbal_NCIM00417	2	rbal_637439426,rbal_637439312	hypothetical protein::hypothetical protein
rbal_NCIM00418	2	rbal_637439427,rbal_637439313	conserved hypothetical protein-putative Fe-S oxidoreductase::hypothetical protein
rbal_NCIM00419	2	rbal_637439314,rbal_637439428	hypothetical protein::hypothetical protein
rbal_NCIM00420	2	rbal_637436991,rbal_637436698	3-deoxy-7-phosphoheptulonate synthase::2-dehydro-3-deoxyphosphooctonate aldolase
rbal_NCIM00421	2	rbal_637436450,rbal_637433992	3-dehydroquinate synthase::3-dehydroquinate synthase
rbal_NCIM00422	2	rbal_637435329,rbal_637439412	hypothetical protein::hypothetical protein
rbal_NCIM00423	2	rbal_637438811,rbal_637438905	probable dioxygenase Rieske iron-sulfur component::putative dioxygenase alpha subunit yeaW
rbal_NCIM00424	2	rbal_637436372,rbal_637437677	hypothetical protein::hypothetical protein
rbal_NCIM00425	2	rbal_637436214,rbal_637435425	hypothetical protein::hypothetical protein
rbal_NCIM00426	2	rbal_637437271,rbal_637435996	probable ferredoxin::probable assimilatory nitrite reductase
rbal_NCIM00427	2	rbal_637439399,rbal_637437273	hypothetical protein-putative transmembrane protein::hypothetical protein-transmembrane prediction
rbal_NCIM00428	2	rbal_637437090,rbal_637433696	probable isoleucyl-tRNA synthetase::valyl-tRNA synthetase
rbal_NCIM00429	2	rbal_637433172,rbal_637437032	acyl carrier protein precursor::probable acyl carrier protein
rbal_NCIM00430	2	rbal_637433087,rbal_637433432	hypothetical protein::hypothetical protein
rbal_NCIM00431	2	rbal_637438388,rbal_637438389	hypothetical protein::hypothetical protein
rbal_NCIM00432	2	rbal_637439161,rbal_637434961	hypothetical protein-transmembrane prediction::hypothetical protein
rbal_NCIM00433	2	rbal_637438345,rbal_637438346	hypothetical protein::hypothetical protein
rbal_NCIM00434	2	rbal_637435792,rbal_637439410	conserved hypothetical protein-putative oxidoreductase::hypothetical protein
rbal_NCIM00435	2	rbal_637436682,rbal_637439446	hypothetical protein::hypothetical protein
rbal_NCIM00436	2	rbal_637433787,rbal_637435644	DNA polymerase beta family::probable DNA polymerase family X
rbal_NCIM00437	2	rbal_637435861,rbal_637433163	endonuclease III::A/G-specific adenine glycosylase
rbal_NCIM00438	2	rbal_637437243,rbal_637436160	hypothetical protein-transmembrane prediction::hypothetical protein
rbal_NCIM00439	2	rbal_637437436,rbal_637437794	adenylate kinase::uridylate kinase
rbal_NCIM00440	2	rbal_637433763,rbal_637433764	probable tetratricopeptide repeat family protein::hypothetical protein
rbal_NCIM00441	2	rbal_637433165,rbal_637434671	cytochrome-c peroxidase::probable cytochrome-c peroxidase
rbal_NCIM00442	2	rbal_637433789,rbal_637437069	putative thioredoxin reductase::thioredoxin reductase
rbal_NCIM00443	2	rbal_637434788,rbal_637435944	probable cell division protein FtsH::hypothetical protein
rbal_NCIM00444	2	rbal_637440210,rbal_637440208	hypothetical protein::hypothetical protein
rbal_NCIM00445	2	rbal_637439935,rbal_637434236	hypothetical protein::hypothetical protein
rbal_NCIM00446	2	rbal_637438559,rbal_637438560	conserved hypothetical protein-putative iron-regulated ABC transporter::conserved hypothetical protein-putative iron-regulated ABC transporter
rbal_NCIM00447	2	rbal_637438607,rbal_637434658	conserved hypothetical protein-putative SAM-dependent methyltransferase::conserved hypothetical protein-putative SAM-dependent methyltransferase
rbal_NCIM00448	2	rbal_637437779,rbal_637437535	putative rRNA methylase::spoU rRNA methylase family protein
rbal_NCIM00449	2	rbal_637434420,rbal_637438719	probable ribonuclease HI::ribonuclease H
rbal_NCIM00450	2	rbal_637435742,rbal_637433828	putative mutase::probable phosphoglycerate mutase
rbal_NCIM00451	2	rbal_637433525,rbal_637433524	conserved hypothetical protein-putative imidazolonepropionase or related amidohydrolase::probable N-acetylglucosamine-6-phosphate deacetylase
rbal_NCIM00452	2	rbal_637438712,rbal_637438539	acid phosphatase::survival protein SurE
rbal_NCIM00453	2	rbal_637433527,rbal_637434475	hypothetical protein::hypothetical protein
rbal_NCIM00454	2	rbal_637439451,rbal_637433895	chromosomal replication initiator protein dnaA::chromosomal replication initiator protein dnaA
rbal_NCIM00455	2	rbal_637435255,rbal_637438450	RadC::DNA repair protein
rbal_NCIM00456	2	rbal_637439208,rbal_637434776	hypothetical protein::hypothetical protein-transmembrane prediction
rbal_NCIM00457	2	rbal_637435991,rbal_637436475	conserved hypothetical protein-putative lipolytic enzyme::hypothetical protein
rbal_NCIM00458	2	rbal_637437941,rbal_637435657	probable ABC transporter::ABC transporter
rbal_NCIM00459	2	rbal_637434941,rbal_637435875	hypothetical protein-transmembrane prediction::hypothetical protein-transmembrane prediction
rbal_NCIM00460	2	rbal_637436276,rbal_637438312	cardiolipin synthase::cardiolipin synthase
rbal_NCIM00461	2	rbal_637439093,rbal_637434547	probable gufA protein homolog-putative divalent heavy-metal cations transporter::gufA protein
rbal_NCIM00462	2	rbal_637433091,rbal_637436309	probable transposase::hypothetical protein
rbal_NCIM00463	2	rbal_637434898,rbal_637439874	ribokinase::predicted ribokinase family sugar kinase
rbal_NCIM00464	2	rbal_637437550,rbal_637438627	phosphoribosylformimino-5-aminoimidazole carboxamide ribotide isomerase::imidazole glycerol phosphate synthase subunit hisF
rbal_NCIM00465	2	rbal_637433556,rbal_637438964	hypothetical protein-signal peptide prediction::hypothetical protein-signal peptide prediction
rbal_NCIM00466	2	rbal_637436643,rbal_637438789	hypothetical protein::hypothetical protein-signal peptide and transmembrane prediction
rbal_NCIM00467	2	rbal_637437078,rbal_637433467	hypothetical protein-transmembrane prediction::hypothetical protein
rbal_NCIM00468	2	rbal_637434854,rbal_637438140	pyruvate dehydrogenase, E2 component, dihydrolipoamide acetyltransferase::dihydrolipoamide succinyltransferase component of 2-oxoglutarate dehydrogenase complex
rbal_NCIM00469	2	rbal_637433330,rbal_637438141	ankyrin-related protein::ank-repeat containing protein
rbal_NCIM00470	2	rbal_637439562,rbal_637439561	hypothetical protein::hypothetical protein
rbal_NCIM00471	2	rbal_637437544,rbal_637434537	similar to spectrin alpha chain::probable fimbrial assembly protein PilM
rbal_NCIM00472	2	rbal_637438819,rbal_637433721	glucose-1-phosphate adenylyltransferase::ADP-glucose pyrophosphorylase
rbal_NCIM00473	2	rbal_637434498,rbal_637437321	hypothetical protein::conserved hypothetical protein-putative periplasmatic serine protease
rbal_NCIM00474	2	rbal_637438497,rbal_637436648	coproporphyrinogen III oxidase::coproporphyrinogen III oxidase
rbal_NCIM00475	2	rbal_637438498,rbal_637438499	hypothetical protein::hypothetical protein
rbal_NCIM00476	2	rbal_637433209,rbal_637437825	nitrate reductase catalytic subunit::formate dehydrogenase-like protein
rbal_NCIM00477	2	rbal_637437106,rbal_637433204	probable permease of ABC transporter::nitrate transport permease protein
rbal_NCIM00478	2	rbal_637438273,rbal_637438769	hypothetical protein::conserved hypothetical protein-putative ATPase with chaperone activity
rbal_NCIM00479	2	rbal_637433983,rbal_637438760	probable menaquinone biosynthesis methlytransferase related protein::similar to N,N-dimethyltransferase
rbal_NCIM00480	2	rbal_637433441,rbal_637435195	hypothetical protein-signal peptide and transmembrane prediction::hypothetical protein-signal peptide and transmembrane prediction
rbal_NCIM00481	2	rbal_637440163,rbal_637439361	hypothetical protein::conserved hypothetical protein-putative Zn-binding protein
rbal_NCIM00482	2	rbal_637435345,rbal_637439219	hypothetical protein-transmembrane prediction::hypothetical protein-transmembrane prediction
rbal_NCIM00483	2	rbal_637434354,rbal_637433935	probable UDP-glucose/GDP-mannose dehydrogenase::UDP-glucose 6-dehydrogenase
rbal_NCIM00484	2	rbal_637440247,rbal_637435796	hypothetical protein-signal peptide and transmembrane prediction::hypothetical protein-signal peptide prediction
rbal_NCIM00485	2	rbal_637436260,rbal_637438519	hypothetical protein-signal peptide and transmembrane prediction::hypothetical protein-signal peptide prediction
rbal_NCIM00486	2	rbal_637438199,rbal_637436087	probable WD-repeat containing protein::similar to activated protein kinase C receptor homolog
rbal_NCIM00487	2	rbal_637436881,rbal_637436641	putative undecaprenyl-phosphate alpha-N-acetylglucosaminyltransferase::putative undecaprenyl-phosphate N-acetylglucosaminyltransferase
rbal_NCIM00488	2	rbal_637435844,rbal_637435859	hypothetical protein::hypothetical protein
rbal_NCIM00489	2	rbal_637437680,rbal_637440207	hypothetical protein-transmembrane prediction::hypothetical protein-signal peptide and transmembrane prediction
rbal_NCIM00490	2	rbal_637436569,rbal_637437139	conserved hypothetical protein-putative ATP/GTP-binding protein::hypothetical protein
rbal_NCIM00491	2	rbal_637438370,rbal_637438375	probable ceramide glucosyltransferase::probable ceramide glucosyltransferase
rbal_NCIM00492	2	rbal_637437914,rbal_637438025	L-serine dehydratase::probable L-serine dehydratase, alpha chain
rbal_NCIM00493	2	rbal_637433215,rbal_637439232	probable RNA 2-phosphotransferase::RNA 2-phosphotransferase
rbal_NCIM00494	2	rbal_637435283,rbal_637433214	hypothetical protein::hypothetical protein
rbal_NCIM00495	2	rbal_637439509,rbal_637439514	hypothetical protein::hypothetical protein
rbal_NCIM00496	2	rbal_637439106,rbal_637439420	conserved hypothetical protein-putative epimerase of the PhzC/PhzF family::conserved hypothetical protein-putative phenazine biosynthesis protein PhzF
rbal_NCIM00497	2	rbal_637437756,rbal_637433311	probable sigma-70 factor, ECF subfamily::probable sigma-70 factor, ECF subfamily
rbal_NCIM00498	2	rbal_637438537,rbal_637438761	hypothetical protein::hypothetical protein
rbal_NCIM00499	2	rbal_637435475,rbal_637438072	conserved hypothetical protein-putative hydrolase of the alpha/beta-hydrolase fold family::conserved hypothetical protein-putative hydrolase
rbal_NCIM00500	2	rbal_637439077,rbal_637435479	hypothetical protein::hypothetical protein
rbal_NCIM00501	2	rbal_637435212,rbal_637435336	ATP-dependent helicase::ATP-dependent helicase hrpA
rbal_NCIM00502	2	rbal_637434745,rbal_637437693	protein phosphatase 1::probable protein phosphatase 1
rbal_NCIM00503	2	rbal_637436746,rbal_637437202	hypothetical protein-signal peptide and transmembrane prediction::hypothetical protein-signal peptide and transmembrane prediction
rbal_NCIM00504	2	rbal_637437341,rbal_637436474	hypothetical protein::hypothetical protein
rbal_NCIM00505	2	rbal_637433667,rbal_637438934	conserved hypothetical protein-putative NifR3 family protein::conserved hypothetical protein-putative protein belonging to the NifR3 family
rbal_NCIM00506	2	rbal_637433660,rbal_637433661	hypothetical protein::hypothetical protein
rbal_NCIM00507	2	rbal_637437907,rbal_637437908	hypothetical protein::hypothetical protein
rbal_NCIM00508	2	rbal_637434575,rbal_637434245	conserved hypothetical protein-putative acetyltransferase::conserved hypothetical protein-putative acetyltransferase
rbal_NCIM00509	2	rbal_637438587,rbal_637438367	hypothetical protein::hypothetical protein
rbal_NCIM00510	2	rbal_637436601,rbal_637439986	hypothetical protein::hypothetical protein
rbal_NCIM00511	2	rbal_637439989,rbal_637433719	N-acetylglucosamine-6-phosphate deacetylase::N-acetylglucosamine-6-phosphate deacetylase NAGA
rbal_NCIM00512	2	rbal_637433666,rbal_637434669	DNA polymerase III alpha subunit::DNA polymerase III alpha subunit
rbal_NCIM00513	2	rbal_637435044,rbal_637437527	hypothetical protein::exporter subunit devC-putative ABC transporter family protein
rbal_NCIM00514	2	rbal_637439230,rbal_637436604	ferredoxin::ferredoxin
rbal_NCIM00515	2	rbal_637433039,rbal_637433912	conserved hypothetical protein-putative cysteine protease::hypothetical protein
rbal_NCIM00516	2	rbal_637440056,rbal_637435442	cytochrome oxidase subunit I::cytochrome c oxidase polypeptide I
rbal_NCIM00517	2	rbal_637440055,rbal_637435443	cytochrome oxidase subunit II::cytochrome-c oxidase chain II/c precursor
rbal_NCIM00518	2	rbal_637437256,rbal_637440089	formamidopyrimidine-DNA glycosylase::probable formamidopyrimidine-DNA glycosylase
rbal_NCIM00519	2	rbal_637438219,rbal_637436245	hypothetical protein::hypothetical protein
rbal_NCIM00520	2	rbal_637437241,rbal_637437209	similar to syringomycin biosynthesis enzyme 2::probable L-proline 4-hydroxylase
rbal_NCIM00521	2	rbal_637435532,rbal_637440359	hypothetical protein::probable tetR-family transcriptional regulator
rbal_NCIM00522	2	rbal_637433129,rbal_637440330	hypothetical protein::hypothetical protein
rbal_NCIM00523	2	rbal_637438731,rbal_637438202	probable D-arabino 3-hexulose 6-phosphate formaldehyde lyase (hps-2)::conserved hypothetical protein-putative formaldehyde-activating enzyme
rbal_NCIM00524	2	rbal_637434878,rbal_637437948	DNA gyrase subunit A::DNA gyrase subunit A
rbal_NCIM00525	2	rbal_637433844,rbal_637433691	probable phytoene dehydrogenase::probable phytoene dehydrogenase
rbal_NCIM00526	2	rbal_637440096,rbal_637433695	2-isopropylmalate synthase::2-isopropylmalate synthase
rbal_NCIM00527	2	rbal_637434402,rbal_637433698	hypothetical protein::hypothetical protein
rbal_NCIM00528	2	rbal_637438001,rbal_637439641	similar to PbrT protein-putative c-type cytochrome::probable PbrT protein-possibly cytochrome c
rbal_NCIM00529	2	rbal_637435965,rbal_637438006	D-amino acid dehydrogenase, small chain::probable D-amino acid oxidase
rbal_NCIM00530	2	rbal_637435147,rbal_637436051	hypothetical protein::hypothetical protein
rbal_NCIM00531	2	rbal_637437774,rbal_637434059	hypothetical protein::hypothetical protein
rbal_NCIM00532	2	rbal_637440071,rbal_637440069	hypothetical protein::hypothetical protein-signal peptide and transmembrane prediction
rbal_NCIM00533	2	rbal_637436320,rbal_637436188	serine/threonine protein phosphatase::serine/threonine protein phosphatase
rbal_NCIM00534	2	rbal_637438921,rbal_637433539	probable phosphoesterase yhaO-putative DNA repair exonuclease::probable DNA repair exonuclease
rbal_NCIM00535	2	rbal_637434840,rbal_637432993	similar to lppV protein::hypothetical protein-signal peptide and transmembrane prediction
rbal_NCIM00536	2	rbal_637435956,rbal_637436282	hypothetical protein::probable beta-galactosidase
rbal_NCIM00537	2	rbal_637437517,rbal_637433070	hypothetical protein::hypothetical protein
rbal_NCIM00538	2	rbal_637437173,rbal_637438675	dihydroorotase::dihydroorotase
rbal_NCIM00539	2	rbal_637440299,rbal_637435092	3-hydroxyisobutyrate dehydrogenase::3-hydroxyisobutyrate dehydrogenase
rbal_NCIM00540	2	rbal_637433812,rbal_637439014	probable platelet-activating factor acetylhydrolase IB gamma subunit::hypothetical protein-transmembrane region and signal peptide prediction
rbal_NCIM00541	2	rbal_637437492,rbal_637433908	conserved hypothetical protein-putative secreted protein::conserved hypothetical protein-putative ankyrin-related protein
rbal_NCIM00542	2	rbal_637434678,rbal_637434455	probable glycosyl hydrolase-putative kappa-carrageenase precursor::Kappa-carrageenase
rbal_NCIM00543	2	rbal_637439904,rbal_637434135	hypothetical protein-signal peptide and transmembrane prediction::hypothetical protein-signal peptide and transmembrane prediction
rbal_NCIM00544	2	rbal_637440310,rbal_637435459	conserved hypothetical protein-putative eukaryotic thiol (cysteine) protease::hypothetical protein
rbal_NCIM00545	2	rbal_637437146,rbal_637439498	hypothetical protein::hypothetical protein
rbal_NCIM00546	2	rbal_637437217,rbal_637435207	hypothetical protein-signal peptide and transmembrane prediction::hypothetical protein
rbal_NCIM00547	2	rbal_637439170,rbal_637439419	CsaA protein::chaperonin involved in protein secretion (CsaA protein)
rbal_NCIM00548	3	rbal_637434906,rbal_637438677,rbal_637436265	hypothetical protein::hypothetical protein::hypothetical protein
rbal_NCIM00549	3	rbal_637433591,rbal_637436539,rbal_637434817	response regulator::probable response-regulator::probable transcriptional regulatory protein fixJ
rbal_NCIM00550	3	rbal_637437658,rbal_637437555,rbal_637434000	hypothetical protein-transmembrane prediction::hypothetical protein::hypothetical protein-signal peptide and transmembrane prediction
rbal_NCIM00551	2	rbal_637440295,rbal_637436240	similar to cysteine proteinase::hypothetical protein-signal peptide prediction
rbal_NCIM00552	2	rbal_637438536,rbal_637438428	hypothetical protein-signal peptide and transmembrane prediction::hypothetical protein-signal peptide prediction
rbal_NCIM00553	2	rbal_637435808,rbal_637433160	high affinity ammonium transporter::ammonium transporter
rbal_NCIM00554	2	rbal_637434374,rbal_637437009	probable response regulator::probable response regulator

## Sheet: reur
family accession	family size	gene accession (IMG Gene ID or NCBI GI)	function
reur_NCIM00001	112	reur_460273096,reur_460273097,reur_460272345,reur_460274529,reur_460272959,reur_460270867,reur_460268779,reur_460274917,reur_460272155,reur_460272643,reur_460271600,reur_460272646,reur_460270247,reur_460270249,reur_460274340,reur_460272862,reur_460272861,reur_460271199,reur_460273590,reur_460273969,reur_460272141,reur_460269648,reur_460271201,reur_460270789,reur_460271212,reur_460271010,reur_4602…	choline sulfatase::arylsulfatase A::iduronate-2-sulfatase::sulfatase atsG::arylsulfatase A::arylsulfatase A::N-acetylgalactosamine 6-sulfate sulfatase (GALNS)::N-acetylgalactosamine 6-sulfate sulfatase (GALNS)::sulfatase family protein::N-acetylgalactosamine 6-sulfate sulfatase (GALNS)::mucin-desulfating sulfatase (N-acetylglucosamine-6-sulfatase)::arylsulfatase::sulfatase family protein::sulfata…
reur_NCIM00002	79	reur_460272615,reur_460271875,reur_460271877,reur_460270406,reur_460273550,reur_460274270,reur_460269181,reur_460275510,reur_460272857,reur_460273207,reur_460275419,reur_460272498,reur_460274564,reur_460275539,reur_460268782,reur_460269498,reur_460268883,reur_460271289,reur_460269830,reur_460269350,reur_460268744,reur_460272396,reur_460273851,reur_460273385,reur_460271917,reur_460269757,reur_4602…	protein containing DUF1559::signal peptide protein::signal peptide protein::secreted protein containing DUF1559::protein containing DUF1559::protein containing DUF1559::signal peptide protein::signal peptide protein::signal peptide protein::protein containing DUF1559::signal peptide protein::protein containing DUF1559::signal peptide protein::protein containing DUF1559::protein containing DUF1559…
reur_NCIM00003	57	reur_460272941,reur_460272538,reur_460272477,reur_460269836,reur_460271870,reur_460275410,reur_460273552,reur_460272365,reur_460273727,reur_460274353,reur_460275575,reur_460273663,reur_460269994,reur_460271811,reur_460271913,reur_460272523,reur_460274020,reur_460268787,reur_460268807,reur_460271468,reur_460269000,reur_460271783,reur_460274958,reur_460273428,reur_460272660,reur_460274078,reur_4602…	nitrate transport ATP-binding protein::sugar (D-ribose) ABC transporter, ATP-binding protein::ABC transporter ATPase component::ABC transporter, ATP-binding protein::membrane protein containing DUF1558::ABC transporter (glutamine transport ATP-binding protein)::lipoprotein releasing system ATP-binding protein lolD::ABC-type multidrug transport system, ATPase component::ABC transporter ATP-binding…
reur_NCIM00004	45	reur_460272524,reur_460274161,reur_460271187,reur_460273982,reur_460269315,reur_460273133,reur_460273334,reur_460273336,reur_460271188,reur_460273372,reur_460270907,reur_460269166,reur_460273799,reur_460270825,reur_460273304,reur_460268751,reur_460272595,reur_460274815,reur_460271664,reur_460275184,reur_460275156,reur_460274716,reur_460274479,reur_460274056,reur_460273568,reur_460272517,reur_4602…	multi-sensor signal transduction histidine kinase::multi-sensor signal transduction histidine kinase::multi-sensor signal transduction histidine kinase::multi-sensor hybrid histidine kinase::ammonium transporter::ATP-binding region, ATPase-like domain protein::multi-sensor hybrid histidine kinase::two-component hybrid sensor and regulator::two component low oxygen sensor histidine kinase::multi-s…
reur_NCIM00005	52	reur_460270015,reur_460272737,reur_460275326,reur_460273883,reur_460273213,reur_460272248,reur_460274279,reur_460269509,reur_460270408,reur_460273544,reur_460274048,reur_460272465,reur_460273155,reur_460273036,reur_460274661,reur_460271427,reur_460271255,reur_460273936,reur_460273978,reur_460273812,reur_460268942,reur_460268943,reur_460268940,reur_460273380,reur_460273912,reur_460271005,reur_4602…	serine/threonine-protein kinase::serine/threonine-protein kinase::serine/threonine protein kinase::serine/threonine protein kinase with PASTA sensor(s)::adenylate/guanylate cyclase::serine/threonine protein kinase::serine/threonine protein kinase::serine/threonine-protein kinase::serine/threonine protein kinase with PASTA sensor(s)::serine/threonine-protein kinase::serine/threonine-protein kinase…
reur_NCIM00006	50	reur_460271991,reur_460270786,reur_460272504,reur_460271498,reur_460273310,reur_460273315,reur_460274428,reur_460271817,reur_460274496,reur_460268684,reur_460270610,reur_460274403,reur_460270196,reur_460272832,reur_460273973,reur_460272119,reur_460268968,reur_460271562,reur_460270195,reur_460273915,reur_460272648,reur_460269863,reur_460272748,reur_460270021,reur_460273170,reur_460274349,reur_4602…	secreted protein containing DUF1549::secreted protein containing DUF1549::Planctomycete cytochrome C::protein containing DUF1549::secreted protein containing DUF1549::secreted protein containing DUF1549::protein containing DUF1549::secreted protein containing DUF1549::secreted protein containing DUF1549::Cytochrome C, Planctomycete domain protein, partial::protein containing DUF1549::secreted pro…
reur_NCIM00007	44	reur_460270785,reur_460275013,reur_460273311,reur_460271499,reur_460274497,reur_460273169,reur_460273314,reur_460274429,reur_460268682,reur_460274404,reur_460272831,reur_460269550,reur_460271818,reur_460270197,reur_460274839,reur_460268969,reur_460271561,reur_460270602,reur_460273916,reur_460269862,reur_460272749,reur_460275306,reur_460272647,reur_460274495,reur_460272096,reur_460270022,reur_4602…	protein containing DUF1501::protein containing DUF1501::secreted protein containing DUF1501::secreted protein containing DUF1501::protein containing DUF1501::secreted protein containing DUF1501::protein containing DUF1501::protein containing DUF1501::secreted protein containing DUF1501::protein containing DUF1501::secreted protein containing DUF1501::secreted protein containing DUF1501::secreted …
reur_NCIM00008	41	reur_460274215,reur_460273233,reur_460273881,reur_460272359,reur_460274355,reur_460269185,reur_460275139,reur_460275559,reur_460271802,reur_460274803,reur_460270921,reur_460271461,reur_460273359,reur_460270145,reur_460269656,reur_460268774,reur_460271769,reur_460273773,reur_460271045,reur_460270246,reur_460272216,reur_460274471,reur_460272843,reur_460270552,reur_460270890,reur_460275310,reur_4602…	oxidoreductase, Gfo/Idh/MocA family protein::oxidoreductase domain-containing protein::oxidoreductase domain protein::oxidoreductase domain-containing protein::NADH-dependent dehydrogenase::oxidoreductase domain-containing protein::oxidoreductase domain protein::oxidoreductase domain-containing protein::oxidoreductase domain protein::oxidoreductase domain-containing protein::NADH-dependent dehydr…
reur_NCIM00009	42	reur_460271306,reur_460273454,reur_460271189,reur_460270685,reur_460274821,reur_460274478,reur_460274526,reur_460273370,reur_460270906,reur_460271543,reur_460271809,reur_460270673,reur_460269021,reur_460275643,reur_460272593,reur_460274969,reur_460274879,reur_460273560,reur_460274717,reur_460268673,reur_460269805,reur_460272516,reur_460271745,reur_460271663,reur_460270337,reur_460269225,reur_4602…	two-component system response regulator::response regulator receiver protein::response regulator receiver protein::two component, sigma54 specific, Fis family transcriptional regulator::sensor kinase::two component, sigma54 specific, Fis family transcriptional regulator::two component transcriptional regulator PhoB, winged helix family::response regulator receiver modulated metal dependent phosph…
reur_NCIM00010	30	reur_460272527,reur_460270014,reur_460271497,reur_460271634,reur_460270449,reur_460272853,reur_460270265,reur_460274565,reur_460268885,reur_460272833,reur_460271568,reur_460269358,reur_460270431,reur_460270377,reur_460272598,reur_460275345,reur_460273168,reur_460270120,reur_460271216,reur_460271762,reur_460274023,reur_460271989,reur_460274653,reur_460270089,reur_460273069,reur_460270763,reur_4602…	RNA polymerase sigma-70 domain protein::RNA polymerase, sigma-24 subunit, ECF subfamily::RNA polymerase sigma-70 ECF-like, Rhodopirellula baltica::RNA polymerase ECF-type sigma factor::RNA polymerase, sigma-24 subunit, ECF subfamily::RNA polymerase sigma-70 ECF-like, Rhodopirellula baltica::RNA polymerase sigma-70 ECF-like, Rhodopirellula baltica::RNA polymerase sigma-70 ECF-like, Rhodopirellula …
reur_NCIM00011	32	reur_460271141,reur_460275499,reur_460273981,reur_460273592,reur_460274446,reur_460269995,reur_460274569,reur_460273034,reur_460273035,reur_460273971,reur_460271489,reur_460271523,reur_460271521,reur_460272421,reur_460274779,reur_460269731,reur_460269820,reur_460270248,reur_460272889,reur_460271667,reur_460270203,reur_460271003,reur_460275662,reur_460272963,reur_460275561,reur_460269500,reur_4602…	serine/threonine protein kinase related protein-like protein::serine/threonine protein kinase::serine/threonine protein kinase related protein::Pyrrolo-quinoline quinone::serine/threonine protein kinase related protein::serine/threonine protein kinase related protein::serine/threonine protein kinase related protein::polyvinylalcohol dehydrogenase::receptor protein kinase-like protein::Pyrrolo-qui…
reur_NCIM00012	25	reur_460274487,reur_460270342,reur_460270569,reur_460273059,reur_460271326,reur_460273458,reur_460274561,reur_460275556,reur_460269899,reur_460269535,reur_460273939,reur_460275192,reur_460273363,reur_460274158,reur_460268771,reur_460274010,reur_460272440,reur_460274345,reur_460272512,reur_460271123,reur_460270083,reur_460274531,reur_460268853,reur_460269607,reur_460272654	membrane-bound dehydrogenase domain protein::glucose/sorbosone dehydrogenase::heme-binding protein::membrane-bound dehydrogenase domain protein::heme-binding protein::Putative heme-binding region domain protein::heme-binding protein::membrane-bound dehydrogenase domain protein::heme-binding protein::large, multifunctional secreted protein::secreted glycosyl hydrolase::membrane-bound dehydrogenase…
reur_NCIM00013	25	reur_460271755,reur_460273032,reur_460268674,reur_460275614,reur_460269161,reur_460275093,reur_460271959,reur_460275444,reur_460274366,reur_460269804,reur_460271170,reur_460273777,reur_460268677,reur_460274202,reur_460271208,reur_460269346,reur_460271907,reur_460269017,reur_460272126,reur_460272125,reur_460275080,reur_460270487,reur_460269282,reur_460275182,reur_460275334	short-chain dehydrogenase/reductase SDR::short chain dehydrogenase/reductase family oxidoreductase::3-oxoacyl-[acyl-carrier protein] reductase::Short-chain dehydrogenase/reductase SDR::gluconate 5-dehydrogenase::short-chain dehydrogenase/reductase SDR::3-ketoacyl-(acyl-carrier-protein) reductase::short-chain dehydrogenase/reductase SDR::short-chain dehydrogenase/reductase SDR::enoyl-[acyl-carrier…
reur_NCIM00014	24	reur_460272541,reur_460275109,reur_460273232,reur_460273231,reur_460274462,reur_460273018,reur_460273156,reur_460273292,reur_460273979,reur_460273211,reur_460268929,reur_460275460,reur_460270547,reur_460275506,reur_460274593,reur_460271008,reur_460270550,reur_460273165,reur_460271007,reur_460271578,reur_460270930,reur_460275459,reur_460269951,reur_460269931	Cadherin domain protein::extracellular nuclease::Planctomycete extracellular domain protein::protein containing Peptidase, archaeal and bacterial::aggregation factor core protein MAFp3, isoform E::aggregation factor core protein MAFp3, isoform C::Cna B-type::hypothetical protein RESH_02118::heme peroxidase, animal::hemolysin-type calcium-binding region::polymorphic outer membrane protein, partial…
reur_NCIM00015	20	reur_460274379,reur_460270651,reur_460273967,reur_460270719,reur_460270927,reur_460273901,reur_460274396,reur_460271963,reur_460272482,reur_460274322,reur_460271213,reur_460272839,reur_460273247,reur_460271209,reur_460271477,reur_460274638,reur_460274026,reur_460269488,reur_460268820,reur_460271296	secreted protein containing DUF1552::protein containing DUF1552::secreted protein containing DUF1552::secreted protein containing DUF1552::secreted protein containing DUF1552::secreted protein containing DUF1552::secreted protein containing DUF1552::secreted protein containing DUF1552::secreted protein containing DUF1552::secreted protein containing DUF1552::secreted protein containing DUF1552::p…
reur_NCIM00016	19	reur_460270499,reur_460272193,reur_460271696,reur_460271794,reur_460274809,reur_460270498,reur_460275197,reur_460271786,reur_460270494,reur_460270496,reur_460271243,reur_460273735,reur_460275591,reur_460274660,reur_460272418,reur_460274458,reur_460269414,reur_460270877,reur_460269327	NAD-dependent epimerase/dehydratase::CDP-glucose 4,6-dehydratase::UDP-glucose 4-epimerase::NAD-dependent epimerase/dehydratase::NAD-dependent epimerase/dehydratase::GDP-D-mannose dehydratase::NAD-dependent epimerase/dehydratase::dTDP-glucose 4,6-dehydratase::dTDP-D-glucose-4,6-dehydratase::GDP-mannose 4,6-dehydratase::vitamin K epoxide reductase::nucleotide di-P-sugar epimerase or dehydratase::UD…
reur_NCIM00017	19	reur_460271595,reur_460270135,reur_460275270,reur_460268589,reur_460271429,reur_460271583,reur_460272604,reur_460275522,reur_460269232,reur_460268619,reur_460275274,reur_460268590,reur_460270998,reur_460269276,reur_460269965,reur_460268660,reur_460268595,reur_460270435,reur_460274016	transport transmembrane protein::transporter AcrB/D/F family::heavy metal efflux pump, CzcA family::Acriflavin resistance protein::heavy metal efflux pump, CzcA family::multidrug resistance protein::CzcA family heavy metal efflux protein::multidrug resistance protein (AcrB/AcrD/AcrF family protein)::transporter, hydrophobe/amphiphile efflux-1 (HAE1) family::copper/silver resistance-related transp…
reur_NCIM00018	20	reur_460271210,reur_460273966,reur_460274025,reur_460271214,reur_460273900,reur_460270718,reur_460274380,reur_460271964,reur_460270926,reur_460272481,reur_460272837,reur_460270649,reur_460273248,reur_460271476,reur_460271295,reur_460274639,reur_460274321,reur_460274395,reur_460268821,reur_460269489	secreted protein containing DUF1588::secreted protein containing DUF1592::secreted protein containing DUF1592::protein containing DUF1588::secreted protein containing DUF1592::protein containing DUF1592::secreted protein containing DUF1592::secreted protein containing DUF1592::secreted protein containing PA14::secreted protein containing DUF1592::secreted protein containing DUF1588::secreted prot…
reur_NCIM00019	18	reur_460272277,reur_460270110,reur_460269039,reur_460274304,reur_460270592,reur_460275592,reur_460270316,reur_460273894,reur_460274168,reur_460269449,reur_460270859,reur_460275552,reur_460274848,reur_460275669,reur_460272980,reur_460271565,reur_460274781,reur_460269849	Integrase, integron-type, partial::phage integrase family protein::Integrase, catalytic core, phage domain protein, partial::integron integrase::phage integrase family protein::site-specific tyrosine recombinase XerD::phage integrase family site specific recombinase::integrase/recombinase Y4QK::tyrosine type site-specific recombinase::phage integrase family protein::Integrase, integron-type::phag…
reur_NCIM00020	18	reur_460272211,reur_460270708,reur_460273562,reur_460272883,reur_460273926,reur_460274067,reur_460271887,reur_460272142,reur_460274836,reur_460275133,reur_460274342,reur_460274656,reur_460274980,reur_460269567,reur_460269891,reur_460274801,reur_460271903,reur_460275235	ATPase, AAA family::methanol dehydrogenase regulatory protein::methanol dehydrogenase regulatory protein::methanol dehydrogenase regulatory protein::methanol dehydrogenase regulator (moxR)-like protein::ATPase associated with various cellular activities AAA_5::methanol dehydrogenase regulator (moxR)-like protein::methanol dehydrogenase regulator (moxR)-like protein::methanol dehydrogenase regulat…
reur_NCIM00021	17	reur_460269516,reur_460270474,reur_460270354,reur_460274053,reur_460274069,reur_460273702,reur_460270464,reur_460274749,reur_460274762,reur_460275365,reur_460272407,reur_460268907,reur_460270471,reur_460274245,reur_460271731,reur_460270171,reur_460274427	glycosyl transferase group 1::glycosyl transferase group 1::glycosyl transferase, group 1 family protein::glycosyltransferase::glycosyl transferase, group 1::glycosyl transferase group 1::glycosyl transferase, group 1::glycosyl transferase group 1::glycosyl transferase, group 1 family protein::glycosyltransferase::hexosyltransferase::mannosyltransferase B::Glycosyl transferase, group 1 domain pro…
reur_NCIM00022	15	reur_460272467,reur_460273841,reur_460273963,reur_460275369,reur_460270615,reur_460271763,reur_460268997,reur_460272842,reur_460272147,reur_460274562,reur_460268955,reur_460272363,reur_460270865,reur_460269605,reur_460275030	secreted protein containing DUF1080::secreted glycosyl hydrolase::secreted glycosyl hydrolase::secreted glycosyl hydrolase::protein containing DUF1080::protein containing DUF1080::secreted glycosyl hydrolase::secreted protein containing DUF1080::secreted glycosyl hydrolase::alpha-L-rhamnosidase::secreted protein containing DUF1080::secreted protein containing DUF1080::secreted protein containing …
reur_NCIM00023	16	reur_460271492,reur_460275414,reur_460274267,reur_460271937,reur_460272165,reur_460268746,reur_460269226,reur_460268636,reur_460269868,reur_460270881,reur_460275625,reur_460269872,reur_460268748,reur_460268749,reur_460274325,reur_460271707	putative secreted protein::ASPIC/UnbV domain-containing protein::ASPIC/UnbV domain-containing protein::ASPIC/UnbV domain-containing protein::ASPIC/UnbV domain-containing protein::ASPIC/UnbV domain-containing protein::ASPIC/UnbV domain-containing protein::TPR repeat-containing protein::ASPIC/UnbV domain-containing protein::ASPIC/UnbV domain-containing protein::hypothetical protein RESH_00088::ASPI…
reur_NCIM00024	16	reur_460271594,reur_460271430,reur_460270133,reur_460268896,reur_460268659,reur_460269992,reur_460268591,reur_460269231,reur_460268620,reur_460272750,reur_460270997,reur_460269277,reur_460268653,reur_460268596,reur_460275273,reur_460270434	Secretion protein HlyD::cobalt-zinc-cadmium resistance protein::membrane fusion protein mtrC::efflux transporter, RND family, MFP subunit::Secretion protein HlyD::efflux transporter, RND family, MFP subunit::efflux transporter, RND family, MFP subunit::efflux transporter, RND family, MFP subunit::metal transport-related, exported protein::protein secretion protein, HlyD family::efflux transporter…
reur_NCIM00025	15	reur_460275607,reur_460272196,reur_460270690,reur_460272112,reur_460270462,reur_460273497,reur_460269004,reur_460275198,reur_460270485,reur_460274947,reur_460268898,reur_460274678,reur_460268904,reur_460268841,reur_460269205	glycosyl transferase, group 2 family protein::glycosyl transferase family protein::glycosyl transferase, group 2 family::glycosyl transferase, group 2 family protein::glycosyl transferase, group 2 family protein::glycosyl transferase, group 2 family protein::dolichol-phosphate mannosyltransferase::glycosyl transferase family protein::glycosyltransferase::glycosyl transferase family 2::glycosyl tr…
reur_NCIM00026	14	reur_460273842,reur_460272051,reur_460272050,reur_460275280,reur_460272540,reur_460271653,reur_460273177,reur_460270721,reur_460274443,reur_460275467,reur_460275466,reur_460275465,reur_460273636,reur_460272681	serine protease::PDZ/DHR/GLGF domain protein::serine protease::peptidase S1C, Do::protease DegQ::2-alkenal reductase::peptidase S1C, Do::serine protease MucD precursor::2-alkenal reductase::protease Do::endopeptidase::periplasmic serine proteinase DO::peptidase S1C, Do::peptidase S1 and S6 chymotrypsin/Hap
reur_NCIM00027	14	reur_460271711,reur_460269758,reur_460273330,reur_460275016,reur_460273938,reur_460274499,reur_460273316,reur_460271028,reur_460273591,reur_460270205,reur_460274414,reur_460268763,reur_460269911,reur_460271202	transcriptional regulator, AraC family::transcriptional regulator, AraC family::xylose operon regulatory protein::transcription regulator::xylose operon regulatory protein::transcription regulator::xylose operon regulatory protein::melibiose operon regulatory protein::xylose operon regulatory protein::transcriptional regulator, AraC family::xylose operon regulatory protein::transcriptional regula…
reur_NCIM00028	14	reur_460274657,reur_460269374,reur_460274180,reur_460272521,reur_460273553,reur_460271886,reur_460274800,reur_460275132,reur_460275532,reur_460274981,reur_460272212,reur_460273927,reur_460274646,reur_460272885	protein containing DUF58::membrane protein containing DUF58::hypothetical protein RESH_01350::hypothetical protein RESH_02846::protein containing DUF58::protein containing DUF58::hypothetical protein RESH_00788::protein containing von Willebrand factor, type A::hypothetical protein RESH_00132::hypothetical protein RESH_00629::membrane or secreted protein containing DUF58::hypothetical protein RES…
reur_NCIM00029	13	reur_460271777,reur_460269016,reur_460270668,reur_460272602,reur_460268676,reur_460270674,reur_460269020,reur_460275095,reur_460274433,reur_460271361,reur_460269284,reur_460273523,reur_460275377	3-oxoacyl-(acyl-carrier protein) synthase::malonyl CoA-acyl carrier protein transacylase::Alcohol dehydrogenase zinc-binding domain protein::3-oxoacyl-(acyl-carrier-protein) synthase II::oxidoreductase, zinc-binding dehydrogenase family::type I polyketide synthase::3-oxoacyl-(acyl-carrier-protein) synthase 2::Alcohol dehydrogenase zinc-binding domain protein::polyketide synthase pks5::zinc-contai…
reur_NCIM00030	12	reur_460270958,reur_460271927,reur_460270820,reur_460270986,reur_460274926,reur_460271030,reur_460272900,reur_460273386,reur_460274922,reur_460269646,reur_460274096,reur_460274925	general secretory pathway protein E::general secretory pathway protein E::type IV-A pilus assembly ATPase PilB::general secretion pathway protein E::type IV-A pilus assembly ATPase PilB::type IV-A pilus assembly ATPase PilB::type II/IV secretion system protein, TadA subfamily::general secretion pathway protein E::type IV-A pilus assembly ATPase PilB::twitching motility protein PilT::type II/IV se…
reur_NCIM00031	13	reur_460271154,reur_460270403,reur_460268736,reur_460270700,reur_460274900,reur_460271535,reur_460272809,reur_460271712,reur_460273326,reur_460273324,reur_460272971,reur_460270193,reur_460272683	lipase/esterase::lipase/esterase::lipase/esterase::lipase/esterase::alpha/beta hydrolase domain-containing protein::lipase/esterase::lipase/esterase::endo-1,4-beta-xylanase B::lipase/esterase::lipase/esterase::pectin acetylesterase::endo-1,4-beta-xylanase B::lipase
reur_NCIM00032	13	reur_460269507,reur_460273488,reur_460269682,reur_460273456,reur_460273792,reur_460271740,reur_460274082,reur_460272412,reur_460271504,reur_460273639,reur_460275525,reur_460271203,reur_460268809	FHA/GGDEF domain-containing protein::protein containing Diguanylate cyclase, predicted::diguanylate cyclase::metal-dependent phosphohydrolase::GGDEF domain-containing protein::sensory box/GGDEF family protein::protein containing Diguanylate cyclase, predicted::response regulator receiver modulated metal dependent phosphohydrolase::HD-GYP hydrolase domain containing protein::diguanylate cyclase::r…
reur_NCIM00033	11	reur_460270591,reur_460272554,reur_460270314,reur_460273895,reur_460275670,reur_460269454,reur_460269859,reur_460269443,reur_460272985,reur_460269131,reur_460269038	transposase, partial::Transposase, IS801/IS1294::transposase::transposase::transposase::transposase::transposase::transposase::hypothetical protein RESH_02416::transposase::transposase, partial
reur_NCIM00034	10	reur_460269165,reur_460274173,reur_460269370,reur_460269536,reur_460273867,reur_460272537,reur_460269491,reur_460274855,reur_460275653,reur_460272311	thioredoxin::Thiol-disulfide oxidoreductase::thioredoxin::redoxin domain-containing protein::FixW protein::FixW protein::thioredoxin related protein::Alkyl hydroperoxide reductase/ Thiol specific antioxidant/ Mal allergen domain protein::Thiol-disulfide oxidoreductase::resA protein
reur_NCIM00035	10	reur_460270266,reur_460274024,reur_460271990,reur_460271215,reur_460270119,reur_460272834,reur_460271569,reur_460268669,reur_460272852,reur_460268886	FecR protein domain protein::FecR protein domain protein::FecR protein domain protein::FecR protein domain protein::FecR protein domain protein::FecR protein domain protein::FecR protein domain protein::FecR protein domain protein::FecR protein domain protein::FecR protein domain protein
reur_NCIM00036	10	reur_460270272,reur_460271402,reur_460271661,reur_460272728,reur_460275516,reur_460274459,reur_460273502,reur_460272692,reur_460272669,reur_460274841	Translation elongation factor EFG/EF2::Translation elongation factor EFTu/EF1A, bacterial and organelle::GTP-binding protein lepA::translation elongation factor G::translation initiation factor IF-2::GTP-binding elongation factor protein TypA/BipA::GTP-binding protein LepA::translation elongation factor Tu::bifunctional sulfate adenylyltransferase subunit 1/adenylylsulfate kinase protein::adenyly…
reur_NCIM00037	10	reur_460269238,reur_460272368,reur_460273608,reur_460275193,reur_460270146,reur_460272835,reur_460269438,reur_460268758,reur_460273256,reur_460273625	secreted protein containing Inosine/uridine-preferring nucleoside hydrolase domain protein::BNR/Asp-box repeat domain protein::inosine/uridine-preferring nucleoside hydrolase::sialidase (Neuraminidase)::BNR/Asp-box repeat-containing domain protein::prabable sialidase::BNR/Asp-box repeat domain protein::Exo-alpha-sialidase::sialidase::Inosine/uridine-preferring nucleoside hydrolase
reur_NCIM00038	10	reur_460272321,reur_460270343,reur_460269075,reur_460273822,reur_460270336,reur_460273532,reur_460273039,reur_460271273,reur_460275528,reur_460269810	signal peptide protein::RNA polymerase sigma-H factor::putative secreted protein::signal peptide protein::secreted protein containing DUF1598::secreted protein containing Type II and III secretion system domain protein::signal peptide protein::secreted protein containing DUF1598::signal peptide protein::secreted protein containing DUF1598
reur_NCIM00039	9	reur_460273547,reur_460270991,reur_460269538,reur_460270470,reur_460272830,reur_460270887,reur_460273366,reur_460269815,reur_460270946	lipolytic protein G-D-S-L family::lipolytic protein G-D-S-L family::acetyl xylan esterase::G-D-S-L family lipolytic protein::Glycoside hydrolase, family 10::glycoside hydrolase family 10::Glycoside hydrolase, family 10::putative secreted protein::endo-1,4-beta-xylanase
reur_NCIM00040	9	reur_460272542,reur_460270637,reur_460271879,reur_460275457,reur_460271373,reur_460274080,reur_460274449,reur_460273529,reur_460272223	ATP-dependent DNA helicase RecQ::DEAD/DEAH box helicase domain-containing protein::cold-shock deAd-box protein a::DEAD/DEAH box helicase domain-containing protein::ATP-dependent DNA helicase RecQ::ATP-dependent DNA helicase RecQ::ATP-dependent DNA helicase RecQ::DEAD/H associated domain protein::ATP-dependent DNA helicase, RecQ family
reur_NCIM00041	9	reur_460271694,reur_460271799,reur_460271691,reur_460271692,reur_460271019,reur_460271020,reur_460271698,reur_460271699,reur_460270226	secreted protein containing DUF1593::secreted protein containing DUF1593::protein containing DUF1593::secreted protein containing DUF1593::secreted protein containing DUF1593, partial::secreted protein containing DUF1593::protein containing DUF1593::protein containing DUF1593::Pectate lyase/Amb allergen
reur_NCIM00042	9	reur_460269070,reur_460269250,reur_460270671,reur_460273172,reur_460275053,reur_460271662,reur_460268819,reur_460272408,reur_460275490	esterase::enterochelin esterase::gluconolactonase::gluconolactonase::gluconolactonase::esterase::gluconolactonase precursor::SMP-30/gluconolaconase/LRE domain-containing protein::SMP-30/gluconolaconase/LRE domain-containing protein
reur_NCIM00043	9	reur_460272383,reur_460274174,reur_460270806,reur_460275536,reur_460273931,reur_460270812,reur_460272002,reur_460270636,reur_460269924	hypothetical protein RESH_02959::putative secreted protein::hypothetical protein RESH_04340::putative secreted or membrane protein::putative secreted protein::hypothetical protein RESH_04346::putative membrane protein::putative membrane protein::hypothetical protein RESH_05189
reur_NCIM00044	9	reur_460271493,reur_460275586,reur_460268750,reur_460271339,reur_460275624,reur_460275564,reur_460268639,reur_460272774,reur_460273080	putative secreted protein::tetratricopeptide repeat family protein::tetratricopeptide TPR_2 repeat protein::TPR repeat-containing protein::c-type cytochrome::TPR repeat-containing protein::c-type cytochrome precursor::TPR repeat-containing protein::TPR repeat-containing protein
reur_NCIM00045	9	reur_460273999,reur_460269470,reur_460275137,reur_460274190,reur_460273992,reur_460270543,reur_460268611,reur_460275683,reur_460268617	F0F1 ATP synthase subunit beta::flagellum-specific ATP synthase::transcription termination factor Rho::transcription termination factor Rho::F0F1 ATP synthase subunit alpha::F0F1 ATP synthase subunit beta::sodium-transporting two-sector ATPase::F0F1 ATP synthase subunit alpha::V-type ATP synthase subunit B
reur_NCIM00046	8	reur_460275333,reur_460274275,reur_460268895,reur_460273486,reur_460274572,reur_460269432,reur_460274695,reur_460273375	outer membrane efflux protein::outer membrane efflux protein::outer membrane efflux protein::outer membrane channel protein::membrane protein containing Peptidase M56, BlaR1 domain protein::outer membrane efflux protein::outer membrane efflux protein::outer membrane efflux protein
reur_NCIM00047	9	reur_460275433,reur_460273203,reur_460272066,reur_460272931,reur_460274912,reur_460273198,reur_460271358,reur_460274421,reur_460269429	amino acid adenylation domain protein::8-amino-7-oxononanoate synthase::non-ribosomal peptide synthetase::acyl-CoA dehydrogenase::peptide synthase::amino-7-oxononanoate synthase::acetyl-coenzyme A synthetase::bifunctional acyl-[acyl carrier protein] synthetase/2-acylglycerophosphoethanolamine acyltransferase::AMP-dependent synthetase and ligase
reur_NCIM00048	8	reur_460270625,reur_460274542,reur_460273683,reur_460271880,reur_460273837,reur_460273530,reur_460271601,reur_460268816	Xylose isomerase domain protein TIM barrel::xylose isomerase domain-containing protein::Xylose isomerase domain protein TIM barrel::Xylose isomerase-type TIM barrel domain protein::Xylose isomerase domain protein TIM barrel::Xylose isomerase domain protein TIM barrel::Xylose isomerase domain protein TIM barrel::D-tagatose 3-epimerase
reur_NCIM00049	8	reur_460271027,reur_460270999,reur_460269953,reur_460274091,reur_460270228,reur_460269786,reur_460274133,reur_460269580	sorbitol dehydrogenase::zinc-containing alcohol dehydrogenase family protein::zinc-containing alcohol dehydrogenase superfamily protein::Alcohol dehydrogenase zinc-binding domain protein::zinc-type alcohol dehydrogenase::zinc-binding dehydrogenase family oxidoreductase::alcohol dehydrogenase, zinc-containing, partial::zinc-type alcohol dehydrogenase protein
reur_NCIM00050	8	reur_460270737,reur_460269354,reur_460269355,reur_460270821,reur_460271928,reur_460271029,reur_460270959,reur_460274928	type II secretion system protein::membrane protein containing Type II secretion system F domain protein::membrane protein containing Type II secretion system F domain protein::general secretion pathway protein F::type II secretion system protein F::type IV pilus biogenesis protein PilC::type IV pilus biogenesis protein PilC::Type II secretion system F domain protein
reur_NCIM00051	8	reur_460273770,reur_460271542,reur_460275277,reur_460273872,reur_460271897,reur_460272586,reur_460270420,reur_460268587	Carbon storage regulator::global regulator::Carbon storage regulator::Carbon storage regulator::Carbon storage regulator::Carbon storage regulator::Carbon storage regulator::hypothetical protein RESH_06314
reur_NCIM00052	8	reur_460270520,reur_460273681,reur_460270687,reur_460269909,reur_460269283,reur_460275217,reur_460268944,reur_460273434	ethanolamine utilization protein eutE::proline dehydrogenase/delta-1-pyrroline-5-carboxylate dehydrogenase::NAD-dependent aldehyde dehydrogenase::Aldehyde dehydrogenase domain protein::succinic-semialdehyde dehydrogenase::ketoglutarate semialdehyde dehydrogenase::ketoglutarate semialdehyde dehydrogenase::aldehyde dehydrogenase
reur_NCIM00053	8	reur_460269835,reur_460269246,reur_460274354,reur_460269839,reur_460269249,reur_460274432,reur_460270362,reur_460270366	ABC transporter, permease protein::ABC transporter integral membrane protein::ABC transporter permease protein::membrane protein containing DUF214, permase predicted::ABC transporter integral membrane protein::ABC transporter permease protein::membrane protein containing DUF214, permase predicted::membrane protein containing DUF214, permase predicted
reur_NCIM00054	8	reur_460272200,reur_460271622,reur_460272270,reur_460273098,reur_460272913,reur_460272664,reur_460275660,reur_460268863	TPR repeat containing protein::transmembrane and tetratricopeptide repeat containing 4::TPR repeat-containing protein::Tetratricopeptide TPR_2 repeat protein::TPR repeat-containing protein::O-linked GlcNAc transferase::TPR repeat-containing protein::TPR repeat-containing protein
reur_NCIM00055	8	reur_460272078,reur_460273919,reur_460274802,reur_460273920,reur_460273921,reur_460270149,reur_460271720,reur_460273436	signal peptide protein::signal peptide protein::hypothetical protein RESH_00790::signal peptide protein::signal peptide protein::signal peptide protein::TolB protein::signal peptide protein
reur_NCIM00056	8	reur_460271193,reur_460272026,reur_460269846,reur_460269840,reur_460269620,reur_460272029,reur_460272975,reur_460269043	transposase IS4 family protein::H repeat-associated protein, partial::H repeat-associated protein::family transposase, partial::hypothetical protein RESH_05415, partial::transposase, IS4 family protein::transposase, partial::transposase IS4 family protein
reur_NCIM00057	8	reur_460274548,reur_460273181,reur_460275544,reur_460271405,reur_460275545,reur_460270059,reur_460268832,reur_460269593	reverse transcriptase/maturase, partial::reverse transcriptase/maturase::RNA-directed DNA polymerase (Reverse transcriptase)::RNA-directed DNA polymerase (Reverse transcriptase)::RNA-directed DNA polymerase (reverse transcriptase)::group II intron-encoding maturase, partial::RNA-directed DNA polymerase (Reverse transcriptase)::Group II intron, maturase-specific domain protein
reur_NCIM00058	8	reur_460274706,reur_460274710,reur_460269098,reur_460269097,reur_460269093,reur_460269209,reur_460270956,reur_460269201	YD repeat protein, partial::Rhs family protein::YD repeat-containing protein::YD repeat-containing protein::YD repeat protein::Rhs family protein::hypothetical protein RESH_04227, partial::YD repeat-containing protein, partial
reur_NCIM00059	7	reur_460269362,reur_460271967,reur_460271693,reur_460272065,reur_460272326,reur_460273511,reur_460273291	beta-lactamase::beta-lactamase::beta-lactamase::N-acyl-D-aspartate deacylase::beta-lactamase::beta-lactamase::penicillin-binding protein
reur_NCIM00060	7	reur_460271237,reur_460269598,reur_460270635,reur_460272001,reur_460269738,reur_460269737,reur_460272435	Biopolymer transport protein ExbD/TolR::biopolymer transport protein ExbD/TolR family::Biopolymer transport protein ExbD/TolR::Biopolymer transport protein ExbD/TolR::biopolymer transport exbD2 protein::Biopolymer transport protein ExbD/TolR::Biopolymer transport protein ExbD/TolR, partial
reur_NCIM00061	7	reur_460274483,reur_460275097,reur_460272356,reur_460273877,reur_460275215,reur_460268934,reur_460271449	dihydrolipoyl dehydrogenase::regulatory protein::dihydrolipoyl dehydrogenase::soluble pyridine nucleotide transhydrogenase::pyridine nucleotide-disulfide oxidoreductase family protein::nitrite reductase::pyridine nucleotide-disulfide oxidoreductase dimerization region
reur_NCIM00062	7	reur_460268760,reur_460272619,reur_460270775,reur_460274794,reur_460274416,reur_460275146,reur_460271344	Sodium/solute symporter, subgroup::sodium/solute symporter family protein glucose transporter::sodium/solute symporter family protein::SSS family solute/sodium (Na+) symporter::symporter YidK::sodium-dependent multivitamin transporter::sodium:solute transporter family, possible urea transporter
reur_NCIM00063	7	reur_460274238,reur_460274157,reur_460270815,reur_460269760,reur_460274139,reur_460271536,reur_460271267	cysteine desulfurase IscS::Aminotransferase, class V/Cysteine desulfurase::aminotransferase class V::aminotransferase, class V::aminotransferase class V::isopenicillin N-epimerase::SufS subfamily cysteine desulfurase
reur_NCIM00064	7	reur_460270411,reur_460275067,reur_460270122,reur_460270684,reur_460269032,reur_460272743,reur_460274860	secreted protein-putative xanthan lyase::secreted protein-putative xanthan lyase::pyridine nucleotide-disulfide oxidoreductase::secreted protein-putative xanthan lyase::secreted protein, putative xanthan lyase::Glucose-inhibited division protein A-related protein::secreted protein, putative xanthan lyase related protein
reur_NCIM00065	7	reur_460268931,reur_460272124,reur_460275297,reur_460273675,reur_460268963,reur_460269987,reur_460273000	hemoglobin::flavohemoprotein::oxidoreductase FAD/NAD(P)-binding domain protein::oxidoreductase FAD-binding subunit::Na(+)-translocating NADH-quinone reductase subunit F::oxidoreductase FAD/NAD(P)-binding domain protein::oxidoreductase FAD/NAD(P)-binding domain protein
reur_NCIM00066	7	reur_460272269,reur_460271782,reur_460273703,reur_460269153,reur_460269169,reur_460273621,reur_460275631	RNA polymerase sigma factor rpoD::RNA polymerase sigma factor rpoS::RNA polymerase, sigma 28 subunit, FliA/WhiG::sigma-70 factor::RNA polymerase, sigma 70 subunit, RpoD subfamily::sigma-70 factor::RNA polymerase, sigma 70 subunit, RpoD subfamily
reur_NCIM00067	6	reur_460268599,reur_460273948,reur_460274268,reur_460274518,reur_460270173,reur_460274005	glycogen debranching enzyme GlgX::glycogen branching enzyme::Glycogen debranching enzyme GlgX::glycogen branching enzyme::malto-oligosyltrehalose trehalohydrolase::glycogen debranching enzyme GlgX
reur_NCIM00068	7	reur_460269269,reur_460271006,reur_460273980,reur_460275029,reur_460274343,reur_460272675,reur_460272962	RNA-polymerase sigma-E factor::RNA polymerase sigma-E factor::RNA polymerase sigma-E type, Rhodopirellula baltica::RNA polymerase sigma-E type, Rhodopirellula baltica::RNA polymerase sigma-E factor::RNA polymerase, sigma-24 subunit, ECF subfamily::RNA polymerase sigma-E factor
reur_NCIM00069	6	reur_460269808,reur_460274178,reur_460271882,reur_460275534,reur_460273929,reur_460274659	membrane protein containing DUF1355::membrane protein containing DUF1355::membrane protein containing DUF1355::putative membrane protein::membrane protein containing DUF1355::putative membrane protein
reur_NCIM00070	6	reur_460274276,reur_460273484,reur_460273378,reur_460274512,reur_460272227,reur_460269481	alkaline proteinase secretion protein aprE::membrane-fusion protein::GAF domain protein::phytochrome sensor protein::alkaline protease secretion protein AprE::phytochrome sensor protein
reur_NCIM00071	6	reur_460273603,reur_460273604,reur_460273606,reur_460273796,reur_460273795,reur_460272004	monovalent cation/H+ antiporter subunit D::monovalent cation/H+ antiporter subunit D::monovalent cation/H+ antiporter subunit D::proton-translocating NADH-quinone oxidoreductase, chain L::NADH dehydrogenase (ubiquinone) chain M::NADH/ubiquinone/plastoquinone (complex I)
reur_NCIM00072	6	reur_460272736,reur_460271588,reur_460271718,reur_460272829,reur_460271365,reur_460272906	hypothetical protein RESH_02677::hypothetical protein RESH_03667::hypothetical protein RESH_03484::hypothetical protein RESH_02528::hypothetical protein RESH_03906::hypothetical protein RESH_02506
reur_NCIM00073	6	reur_460271683,reur_460271685,reur_460269558,reur_460269559,reur_460271531,reur_460271533	TadE-like protein::transporter::hypothetical protein RESH_05474::transporter::TadE family protein::TadE-like protein
reur_NCIM00074	6	reur_460272016,reur_460275248,reur_460271857,reur_460273065,reur_460274915,reur_460274126	redoxin::bacterioferritin comigratory protein::peroxiredoxin-2::alkyl hydroperoxide reductase/ Thiol specific antioxidant/ Mal allergen::alkyl hydroperoxide reductase/ Thiol specific antioxidant/ Mal allergen::alkyl hydroperoxide reductase/ Thiol specific antioxidant/ Mal allergen
reur_NCIM00075	6	reur_460275129,reur_460271684,reur_460275130,reur_460274983,reur_460271532,reur_460269556	BatB protein::von Willebrand factor type A::von Willebrand factor(vWA) type A domain-containing protein::von Willebrand factor type A domain-containing protein::von Willebrand factor type A::von Willebrand factor type A
reur_NCIM00076	6	reur_460273483,reur_460274278,reur_460273379,reur_460269483,reur_460272225,reur_460274513	peptidase, M50 family::peptidase, M50 family::peptidase, M50 family::M50 family peptidase::peptidase, M50 family::peptidase, M50 family
reur_NCIM00077	6	reur_460270828,reur_460268987,reur_460270325,reur_460270962,reur_460270010,reur_460269631	integrase family protein::site-specific recombinase::integrase family protein::integrase family protein::Integrase::hypothetical protein RESH_05426
reur_NCIM00078	6	reur_460270011,reur_460268643,reur_460268973,reur_460274058,reur_460269867,reur_460269864	signal peptide protein::signal peptide protein::signal peptide protein::signal peptide protein::signal peptide protein::signal peptide protein
reur_NCIM00079	6	reur_460272128,reur_460271577,reur_460268861,reur_460274138,reur_460273785,reur_460275323	putative secreted protein::ferredoxin::ferredoxin::signal peptide protein::YTV domain protein::hypothetical protein RESH_00192
reur_NCIM00080	6	reur_460269026,reur_460275281,reur_460270450,reur_460275638,reur_460268581,reur_460274006	heavy metal translocating P-type ATPase::heavy metal translocating P-type ATPase::heavy metal translocating P-type ATPase::heavy metal translocating P-type ATPase::heavy metal translocating P-type ATPase::heavy metal translocating P-type ATPase
reur_NCIM00081	6	reur_460269101,reur_460270538,reur_460269094,reur_460274709,reur_460269208,reur_460273293	protein containing DUF1568::protein containing DUF1568::hypothetical protein RESH_05872::hypothetical protein RESH_00871::protein containing DUF1568::hypothetical protein RESH_02119
reur_NCIM00082	6	reur_460270836,reur_460273615,reur_460271348,reur_460272911,reur_460270160,reur_460273539	general secretion pathway protein D::type II and III secretion system protein::general secretion pathway protein D (outD)::bacterial type II/III secretion system protein::type II and III secretion system protein::Type II and III secretion system domain protein
reur_NCIM00083	6	reur_460271637,reur_460269544,reur_460272457,reur_460273365,reur_460275157,reur_460268662	putative secreted protein::esterase::protein of unknown function acetylesterase::esterase::acetyl esterase::phospholipase/carboxylesterase
reur_NCIM00084	6	reur_460274277,reur_460269022,reur_460273485,reur_460269482,reur_460273377,reur_460272226	multidrug efflux pump::multidrug efflux pump::membrane-fusion protein::Multidrug resistance efflux pump-like protein::secretion protein HlyD family protein::secretion protein HlyD family protein
reur_NCIM00085	6	reur_460272040,reur_460268721,reur_460273891,reur_460268873,reur_460272948,reur_460273024	ISSpo2, transposase, partial::ISSpo2, transposase::ISSpo2, transposase, partial::transposase DDE domain protein, partial::ISSpo2, transposase, partial::transposase IS4 family protein, partial
reur_NCIM00086	6	reur_460274468,reur_460272566,reur_460273006,reur_460272568,reur_460273766,reur_460269782	MscS Mechanosensitive ion channel::MscS Mechanosensitive ion channel::small-conductance mechanosensitive channel::MscS Mechanosensitive ion channel::small-conductance mechanosensitive channel::MscS Mechanosensitive ion channel
reur_NCIM00087	6	reur_460273613,reur_460271304,reur_460270206,reur_460271116,reur_460268759,reur_460275147	dihydroxydipicolinate synthase::dihydrodipicolinate synthase::dihydroxydipicolinate synthase::Dihydrodipicolinate synthase::N-acetylneuraminate lyase::dihydrodipicolinate synthetase
reur_NCIM00088	7	reur_460272376,reur_460272511,reur_460270212,reur_460272860,reur_460273820,reur_460269608,reur_460271155	multi-domain protein::large multi-functional protein::large multi-functional protein::large multi-functional protein::large multi-functional protein::hypothetical protein RESH_05441::large multifunctional protein-putative glycosyl hydrolase
reur_NCIM00089	5	reur_460273734,reur_460272190,reur_460271127,reur_460272341,reur_460270478	DegT/DnrJ/EryC1/StrS aminotransferase::perosamine synthetase::DegT/DnrJ/EryC1/StrS aminotransferase family protein::pleiotropic regulatory protein::pleiotropic regulatory protein DegT
reur_NCIM00090	5	reur_460271501,reur_460275216,reur_460271701,reur_460272012,reur_460271439	transcription regulator::transcriptional regulator, ArsR family::ArsR family transcriptional regulator::ArsR family transcriptional regulator::transcriptional regulator, ArsR family
reur_NCIM00091	5	reur_460273025,reur_460268661,reur_460269920,reur_460272565,reur_460275106	protein belonging to Uncharacterized protein family UPF0118::protein belonging to Uncharacterized protein family UPF0118::protein belonging to Uncharacterized protein family UPF0118::protein belonging to Uncharacterized protein family UPF0118::protein belonging to Uncharacterized protein family UPF0118
reur_NCIM00092	5	reur_460272246,reur_460273091,reur_460273863,reur_460270658,reur_460273628	receptor protein kinase::putative secreted protein::adenylate cyclase regulatory protein::leucine-rich repeat domain protein::adenylate cyclase regulatory protein
reur_NCIM00093	5	reur_460272000,reur_460270634,reur_460269739,reur_460275588,reur_460272436	biopolymer transport ExbB-related protein::tolQ-type transport protein::MotA/TolQ/ExbB proton channel::TolQ-type transport protein::TolQ-type transport protein
reur_NCIM00094	5	reur_460275247,reur_460275246,reur_460274309,reur_460269937,reur_460269889	molecular chaperone protein HspA/DnaK::heat-shock chaperone protein::chaperone protein DnaK::molecular chaperone DnaK::molecular chaperone DnaK
reur_NCIM00095	5	reur_460275432,reur_460269173,reur_460270486,reur_460268785,reur_460269384	Aminotransferase class-III::glutamate-1-semialdehyde 2,1-aminomutase::glutamate-1-semialdehyde aminotransferase::adenosylmethionine-8-amino-7-oxononanoate aminotransferase::aminotransferase class-III
reur_NCIM00096	5	reur_460271825,reur_460274610,reur_460272330,reur_460270291,reur_460270845	type I restriction-modification system, M subunit::type I restriction-modification system, M subunit N-6 Adenine-specific DNA methylase::type I restriction-modification system, M subunit, partial::type I restriction-modification system, M subunit::type I restriction-modification system, M subunit
reur_NCIM00097	5	reur_460275023,reur_460273249,reur_460270554,reur_460269662,reur_460269663	hypothetical protein RESH_00598::Major facilitator superfamily MFS-1::hypothetical protein RESH_04578::hypothetical protein RESH_05342::hypothetical protein RESH_05343
reur_NCIM00098	5	reur_460273453,reur_460269866,reur_460273206,reur_460273471,reur_460269753	repeat domain protein::protein containing DUF11::60 kDa outer membrane protein, serovars L1/L2/L3::60 kDa outer membrane protein::repeat domain protein
reur_NCIM00099	5	reur_460273357,reur_460271962,reur_460275489,reur_460270661,reur_460273013	Formylglycine-generating sulfatase enzyme::Formylglycine-generating sulfatase enzyme::Formylglycine-generating sulfatase enzyme::Formylglycine-generating sulfatase enzyme::Formylglycine-generating sulfatase enzyme
reur_NCIM00100	5	reur_460270127,reur_460270473,reur_460274116,reur_460270479,reur_460271424	Serine O-acetyltransferase::serine O-acetyltransferase::transferase hexapeptide repeat containing protein::acetyltransferase::Maa (Maltose O-acetyltransferase)
reur_NCIM00101	5	reur_460269071,reur_460270652,reur_460271602,reur_460271281,reur_460268888	aldo/keto reductase family oxidoreductase TAS::oxidoreductase, aldo/keto reductase family::oxidoreductase::oxidoreductase, aldo/keto reductase family::aldo/keto reductase
reur_NCIM00102	5	reur_460273399,reur_460273398,reur_460275190,reur_460268852,reur_460275165	Phosphodiesterase/alkaline phosphatase D-like protein::Phosphodiesterase/alkaline phosphatase D-like protein::phosphodiesterase/alkaline phosphatase D::alkaline phosphatase D::secreted alkaline phosphatase
reur_NCIM00103	5	reur_460272063,reur_460273475,reur_460269349,reur_460272529,reur_460270063	hypothetical protein RESH_03203::hypothetical protein RESH_01830::protein containing DUF1568::protein containing DUF1568::protein containing DUF1568
reur_NCIM00104	5	reur_460271835,reur_460272111,reur_460270855,reur_460273835,reur_460272818	plasmid partition protein ParA-like protein::Cobyrinic acid ac-diamide synthase::ParA family protein::chromosome partitioning protein ParA::chromosome partitioning protein parA
reur_NCIM00105	5	reur_460268585,reur_460269670,reur_460268865,reur_460271259,reur_460272252	thioredoxin::Thioredoxin::Thioredoxin domain protein::thioredoxin::thioredoxin
reur_NCIM00106	6	reur_460273180,reur_460273937,reur_460274207,reur_460274631,reur_460274505,reur_460274652	diguanylate phosphodiesterase::Diguanylate phosphodiesterase, predicted domain protein::FHA domain containing protein::FHA domain containing protein::Forkhead-associated protein::FHA domain containing protein
reur_NCIM00107	4	reur_460268847,reur_460271612,reur_460274567,reur_460271002	dienelactone hydrolase family protein::carboxymethylenebutenolidase::twin-arginine translocation pathway signal::dienelactone hydrolase
reur_NCIM00108	4	reur_460271922,reur_460270410,reur_460273480,reur_460274317	signal peptide protein::secreted protein containing DUF1573::protein containing DUF1573::secreted protein containing DUF1573, partial
reur_NCIM00109	4	reur_460271797,reur_460275142,reur_460270655,reur_460270260	Glycerol kinase::L-ribulokinase::xylulose kinase::Rhamnulokinase (Rhamnulose kinase)
reur_NCIM00110	4	reur_460269801,reur_460270805,reur_460270329,reur_460273367	Integrase, catalytic core, phage domain protein::Integrase, catalytic core, phage domain protein::hypothetical protein RESH_05002::Integrase, catalytic core, phage domain protein
reur_NCIM00111	4	reur_460268582,reur_460275282,reur_460269828,reur_460275164	integral membrane protein::integral membrane protein::cation efflux system protein::zinc transporter ZitB
reur_NCIM00112	4	reur_460270509,reur_460271674,reur_460272208,reur_460268777	30S ribosomal protein S1::30S ribosomal protein S1::Ribosomal protein S1, RNA binding domain protein::Transcriptional accessory protein
reur_NCIM00113	4	reur_460273958,reur_460270426,reur_460270522,reur_460268889	acetate kinase::acetate kinase::acetate kinase::acetate kinase
reur_NCIM00114	4	reur_460269493,reur_460268770,reur_460272699,reur_460272510	putative secreted protein::hypothetical protein RESH_06156::putative secreted protein::hypothetical protein RESH_02835
reur_NCIM00115	4	reur_460269202,reur_460269096,reur_460274707,reur_460270957	hypothetical protein RESH_05805::hypothetical protein RESH_05874::hypothetical protein RESH_00869::hypothetical protein RESH_04228
reur_NCIM00116	4	reur_460270284,reur_460270326,reur_460270279,reur_460270278	Excisionase/Xis, DNA-binding domain protein::Excisionase/Xis, DNA-binding domain protein::hypothetical protein RESH_04952::hypothetical protein RESH_04951
reur_NCIM00117	4	reur_460271658,reur_460273376,reur_460274059,reur_460271670	preprotein translocase, SecA subunit::preprotein translocase subunit SecA::preprotein translocase subunit SecA, partial::preprotein translocase subunit SecA
reur_NCIM00118	4	reur_460271471,reur_460275659,reur_460275177,reur_460275583	D-isomer specific 2-hydroxyacid dehydrogenase NAD-binding protein::glyoxylate/hydroxypyruvate reductase::D-isomer specific 2-hydroxyacid dehydrogenase NAD-binding protein::D-3-phosphoglycerate dehydrogenase
reur_NCIM00119	4	reur_460273726,reur_460275604,reur_460270164,reur_460269600	bifunctional GMP synthase/glutamine amidotransferase protein::para-aminobenzoate synthase glutamine amidotransferase component II::carbamoyl phosphate synthase small subunit::anthranilate synthase component II
reur_NCIM00120	4	reur_460272392,reur_460274770,reur_460274186,reur_460269626	nitrogen regulatory protein P-II::nitrogen regulatory protein P-II::Nitrogen regulatory protein PII::nitrogen regulatory protein P-II
reur_NCIM00121	4	reur_460268623,reur_460275289,reur_460275298,reur_460270436	secreted protein::secreted protein::hypothetical protein RESH_00393::hypothetical protein RESH_04704
reur_NCIM00122	4	reur_460271830,reur_460270849,reur_460270288,reur_460274614	type I restriction-modification system restriction subunit::type i restriction enzyme hindviip r protein::type I site-specific deoxyribonuclease, HsdR family::type III restriction protein res subunit
reur_NCIM00123	4	reur_460268842,reur_460270200,reur_460271230,reur_460271065	beta-galactosidase::calcineurin-like phosphoesterase domain-containing protein 1::hypothetical protein RESH_03924::hypothetical protein RESH_04150
reur_NCIM00124	4	reur_460270468,reur_460270469,reur_460275291,reur_460275205	acyltransferase 3::acyltransferase 3::acyltransferase 3::acyltransferase 3
reur_NCIM00125	4	reur_460269979,reur_460274585,reur_460273141,reur_460272938	molybdopterin oxidoreductase, iron-sulfur binding subunit::cyclic nucleotide-binding protein::molybdopterin oxidoreductase, iron-sulfur binding subunit::molybdopterin oxidoreductase, iron sulfur subunit
reur_NCIM00126	4	reur_460273037,reur_460275487,reur_460273974,reur_460270665	RNA polymerase sigma-70 ECF-like protein::RNA polymerase sigma-70 ECF-like protein::RNA polymerase sigma-70 ECF-like protein::RNA polymerase sigma-70 ECF-like protein
reur_NCIM00127	4	reur_460270432,reur_460275267,reur_460270445,reur_460272608	Outer membrane efflux protein::Outer membrane efflux protein::Outer membrane efflux protein::outer membrane efflux protein
reur_NCIM00128	4	reur_460274719,reur_460271180,reur_460274721,reur_460274720	universal stress protein::universal stress protein::universal stress protein::universal stress protein, UspA-like protein
reur_NCIM00129	4	reur_460274121,reur_460271912,reur_460268952,reur_460269359	transcriptional regulator, GntR family with aminotransferase domain protein::transcriptional regulator, GntR family::GntR family transcriptional regulator::transcriptional regulator, GntR family
reur_NCIM00130	4	reur_460272969,reur_460275261,reur_460269236,reur_460273801	sulfate transporter family protein::transmembrane transport protein::sulfate transporter::sulfate transporter family protein
reur_NCIM00131	4	reur_460273855,reur_460271436,reur_460274724,reur_460271438	Rhodanese domain protein::metallo-beta-lactamase/rhodanese-like domain-containing protein::metallo-beta-lactamase/rhodanese-like domain-containing protein::rhodanese domain-containing protein
reur_NCIM00132	4	reur_460269189,reur_460272758,reur_460273852,reur_460269854	secreted protein containing DUF1570::secreted protein containing DUF1570::protein containing DUF1570::protein containing DUF1570
reur_NCIM00133	4	reur_460269991,reur_460269975,reur_460273001,reur_460269997	Cupin 2 conserved barrel domain protein::hypothetical protein RESH_05128::cupin 2 domain-containing protein::Cupin 2 conserved barrel domain protein
reur_NCIM00134	4	reur_460271342,reur_460272474,reur_460270465,reur_460272627	asparagine synthase (glutamine-hydrolyzing)::amidophosphoribosyltransferase::asparagine synthase (glutamine-hydrolyzing)::asparagine synthase (glutamine-hydrolyzing)
reur_NCIM00135	4	reur_460269376,reur_460275415,reur_460271044,reur_460275596	(CYCLOPHILIN 5) peptidyl-prolyl cis-trans isomerase::peptidylprolyl isomerase::Peptidylprolyl isomerase::cyclophilin type peptidylprolyl isomerase
reur_NCIM00136	4	reur_460270004,reur_460271895,reur_460269986,reur_460274359	Transcriptional regulator, Rrf2::Transcriptional regulator, Rrf2::Transcriptional regulator, Rrf2::Transcriptional regulator, Rrf2
reur_NCIM00137	4	reur_460270324,reur_460270961,reur_460270315,reur_460275477	recombinase::Recombinase::hypothetical protein RESH_04988::Resolvase domain protein
reur_NCIM00138	4	reur_460270238,reur_460269148,reur_460269969,reur_460273066	DNA helicase, UvrD/REP type::ATP-dependent DNA helicase PcrA, partial::UvrD/REP helicase::ATP-dependent DNA helicase PcrA
reur_NCIM00139	4	reur_460273762,reur_460268670,reur_460274118,reur_460271363	haloalkane dehalogenase::hydrolase, alpha/beta hydrolase fold family protein::alpha/beta hydrolase fold protein::alpha/beta hydrolase fold protein
reur_NCIM00140	4	reur_460270503,reur_460273641,reur_460268766,reur_460271714	glucosamine-6-phosphate deaminase::Glucosamine-6-phosphate deaminase::glucosamine-6-phosphate deaminase::glucosamine-6-phosphate isomerase
reur_NCIM00141	4	reur_460269803,reur_460270878,reur_460270784,reur_460272700	redoxin domain-containing protein::Thiol-disulfide oxidoreductase::Alkyl hydroperoxide reductase/ Thiol specific antioxidant/ Mal allergen domain protein::alkyl hydroperoxide reductase/ Thiol specific antioxidant/ Mal allergen
reur_NCIM00142	4	reur_460272081,reur_460274450,reur_460268798,reur_460274971	Pseudouridine synthase domain protein::ribosomal large subunit pseudouridine synthase D::ribosomal large subunit pseudouridine synthase D::ribosomal large subunit pseudouridine synthase D
reur_NCIM00143	4	reur_460272539,reur_460272390,reur_460271022,reur_460274079	ribose ABC transporter permease protein::monosaccharide-transporting ATPase::ribose transport system permease protein rbsC::ribose transport system permease protein RbsC
reur_NCIM00144	4	reur_460269894,reur_460275005,reur_460275099,reur_460269425	intracellular protease, PfpI family::intracellular protease, PfpI family::intracellular protease, PfpI family protein::intracellular protease, PfpI family
reur_NCIM00145	4	reur_460271650,reur_460270199,reur_460271330,reur_460274290	Non-specific serine/threonine protein kinase::helicase, Snf2 family protein::SNF2-related protein::SNF2-related protein
reur_NCIM00146	4	reur_460273320,reur_460270184,reur_460272015,reur_460272520	hypothetical protein RESH_02146::hypothetical protein RESH_04857::hypothetical protein RESH_03294::hypothetical protein RESH_02845
reur_NCIM00147	4	reur_460275346,reur_460273086,reur_460272518,reur_460274798	a von Willebrand factor type A (vWA) domain protein::von Willebrand factor type A::von Willebrand factor type A domain-containing protein::von Willebrand factor type A
[truncated: 419 more rows]

## Sheet: rmai
family accession	family size	gene accession (IMG Gene ID or NCBI GI)	function
[truncated: 668 more rows]

## Sheet: p2
family accession	family size	gene accession (IMG Gene ID or NCBI GI)	function
[truncated: 533 more rows]

[truncated: 17 more sheets: p1, psta, bmar, p3, pmar, plim, spal, pbra, ipal, saci, gobs, pmik, kstu, cfla, vspi, lara, zgal]
