# Supplementary material for: Genome Analysis of Planctomycetes Inhabiting Blades of the Red Alga Porphyra umbilicalis
Source: PLoS One. 2016 Mar 25;11(3):e0151883. doi: 10.1371/journal.pone.0151883 (PMC4807772; doi:10.1371/journal.pone.0151883)
Supplement: S6 Table — Abbreviated family names are response regulators (RR), serine/threonine protein kinases (STPK), domain of unknown function (DUF), ABC transporters (ABC), glycosyltransferases (GT1, GT2), NADH-dependent dehydrogenases (NDDH), membrane-bound dehydrogenases (MBDH). (XLSX) [file pone.0151883.s017.xlsx]

## Sheet: Sheet1
Table S6. Highly represented gene families in Planctomycetes. Abbreviated family names are response regulators (RR), serine/threonine protein kinases (STPK), domain of unknown function (DUF), ABC transporters (ABC), glycosyltransferases (GT1, GT2), NADH-dependent dehydrogenases (NDDH), membrane-bound dehydrogenases (MBDH).
	response regulator	sulfatase	STPK	DUF1559	DUF1549 DUF1553	DUF1501	ABC	glycosyl transferase 1	glycosyl transferase 2	NADH dehydrogenase	MB dehydrogenase
R. rubra	120	200	79	118	42	37	62	29	20	43	16
R. sallentina	122	156	74	119	44	37	62	42	18	37	17
R. baltica	94	106	57	74	48	41	54	19	13	37	25
R. europaea	87	112	52	79	50	44	57	17	15	41	25
R. maiorica	122	187	66	115	71	61	59	48	23	49	35
P2	116	142	71	45	48	38	57	15	11	37	30
P1	90	134	107	61	37	32	54	21	15	30	28
P. staleyi	78	35	33	70	57	57	52	8	13	28	23
B. marina	105	40	42	208	42	31	48	18	12	34	25
P3	65	22	25	60	20	18	35	13	7	20	0
P. limnophilus	68	36	29	77	28	25	42	13	9	25	15
S. paludicola	133	41	59	123	80	116	67	13	6	42	21
P. maris	92	87	43	142	73	95	51	11	16	46	30
P. brasiliensis	83	102	31	110	42	38	48	25	22	34	19
I. pallida	61	17	64	47	26	26	52	27	19	26	12
S. acidiphila	137	37	96	188	61	90	68	38	35	48	29
G. obscuriglobus	148	14	110	144	49	62	60	34	15	34	22
P. mikurensis	32	19	4	31	0	0	46	15	11	22	0
K. stuttgartiensis	90	3	2	3	0	0	30	17	20	1	1
C. flavus	211	46	37	7	66	54	67	34	36	37	51
V. spinosum	123	46	24	8	63	48	73	38	33	43	44
L. araneosa	35	302	106	158	31	25	46	10	5	17	31
Z. galactanivorans	117	74	0	0	9	5	40	8	16	22	5
